# Supplementary material for: Proton-assisted activation of a MnIII–OOH for aromatic C–H hydroxylation through a putative [MnVO] species
Source: Royal Society of Chemistry journal article supplement (doi:10.1039/d4cc00798k), 2024-01-01
Supplement: d4cc00798k1.pdf [file d4cc00798k1.pdf]

Supporting online information for

## Proton-assisted activation of a Mn<sup>III</sup>-OOH for aromatic C-H hydroxylation through a putative [Mn<sup>V</sup>=O] species

Sikha Gupta,<sup>a</sup> Parkhi Sharma,<sup>a</sup> Khyati Jain,<sup>a</sup> Bittu Chandra,<sup>b</sup> Sharath Chandra Mallojjala,<sup>c,\*</sup> and Apparao Draksharapu<sup>a,\*</sup>

<sup>a</sup> Department of Chemistry, Indian Institute of Technology Kanpur, Kanpur-208016 (India)

Email: appud@iitk.ac.in

<sup>b</sup> Department of Chemistry, University of Minnesota, Minneapolis, Minnesota 55455, United States.

<sup>c</sup> Department of Chemistry, Binghamton University, Binghamton, New York 13902, United States.

sharathc@binghamton.edu

### Materials and methods:

All the commercially available chemicals used in the study were used as purchased. Hydrogen peroxide was purchased from TCI Chemicals, and triethyl amine was acquired from Alfa Aesar. Mn<sup>II</sup>(H<sub>2</sub>O)<sub>6</sub>(ClO<sub>4</sub>)<sub>2</sub> from Sigma Aldrich and HPLC grade solvents (MeCN, MeOH, and H<sub>2</sub>O) were availed from Thomas Baker.

**Caution!** Perchlorate salts of metal complexes containing organic ligands are potentially explosive. These compounds should be prepared in small quantities and handled with proper safety precautions.

### Instrumentation:

Agilent 8453 diode-array spectrophotometer was used to record UV/Vis absorption spectra. The -40 °C temperature was maintained with a cryostat from Unisoku Scientific Instruments. 1 cm quartz cells ( $\lambda = 190$ -1100 nm range) were used to monitor reaction kinetics on the UV/Vis spectrophotometer. ESI-MS was performed using Agilent 6546 LC/Q-TOF under positive ion mode. Resonance Raman spectra were obtained at 405 nm excitation wavelength (40 mW, Cobolt lasers, HÜBNER Photonics) using Kymera 328i motorized Czerny-Turner Spectrograph (Andor Technology) equipped with a DU 420A-BEX2-DD camera (iDus 420 CCD, Andor Technology). The CCD camera was cooled to -80 °C. The spectral slit width of the instrument was set to 100  $\mu$ m. The spectral calibration was performed using a 1:1 MeCN: toluene (v/v) solvent mixture. NMR spectra were recorded on a Bruker 400 MHz spectrometer at 233 K. The X-band electron paramagnetic resonance (EPR) was measured on a JES-FA200 ESR spectrometer at 77 K in acetonitrile solution. EPR parameters : [ frequency, 9136 MHz; power, 0.995 mW; field center, 490.0 mT, width,  $\pm 500.00$  Mt; sweep time, 30.0 s; modulation frequency, 100.00 kHz, width, 1 mT; amplitude, 1 mT; and time constant, 0.03 s].

The reaction mixture was injected (10  $\mu$ L) in HPLC system (Agilent 1260 infinity machine model) attached with a ZORBAX SB-C-18 reverse phase column (150  $\times$  4.6 mm, 5  $\mu$ m) and DAD detector. Individual purity of the sample was analyzed prior to reactivity studies using HPLC experiments with the method described below: A gradient mixture of water and acetonitrile possessing 0.1% trifluoroacetic acid (pre-degassed by applying vacuum and ultrasonication) was used as the mobile phase. Method: 0 min to 15 min, 0.5 mL per min flow rate. For the oxidation reaction of xanthene, the condition given in the table below was used.

| Time (minutes) | Water<br>(0.1% trifluoroacetic acid) | Acetonitrile (0.1%<br>trifluoroacetic acid) |
|----------------|--------------------------------------|---------------------------------------------|
| 0.00           | 70.00                                | 30.00                                       |
| 5.00           | 70.00                                | 30.00                                       |
| 5.10           | 40.00                                | 60.00                                       |
| 8.00           | 40.00                                | 60.00                                       |
| 8.10           | 10.00                                | 90.00                                       |
| 12.00          | 10.00                                | 90.00                                       |
| 12.10          | 70.00                                | 30.00                                       |
| 15.00          | 70.00                                | 30.00                                       |

#### Method of detecting formaldehyde in the solution:

The presence of formaldehyde in the solution is detected using the Hantzsch reaction.<sup>1</sup> The reaction between acetylacetone, ammonia, and formaldehyde at pH 6 results in a yellow-colored species due to the formation of diacetyl-dihydro-lutidine at room temperature. The yellow species gives a prominent band at 412 nm in the UV/Vis spectrum.<sup>1</sup>

The reagent solution is prepared by mixing of NH<sub>4</sub>OAc (15 g, 0.19 mol), acetic acid (0.3 mL, 5.4 mol), and acetylacetone (0.2 mL, 1.9 mol) in 100 mL water.<sup>2</sup> Addition of reagent solution to the solution of **3A** in MeOH, depicted a band at 412 nm, confirming the presence of formaldehyde in the solution.

#### Characterization of [(BnTPEN)Mn<sup>III</sup>-(OO)]<sup>+</sup> (**2**):

According to the reported literature, the suitable way of generating Mn<sup>III</sup>-OOH is via the protonation of Mn<sup>III</sup>-(OO) species.<sup>3</sup> Hence, we first tried to synthesize [(BnTPEN)Mn<sup>III</sup>-(OO)]<sup>+</sup> species. When 10 eq. of H<sub>2</sub>O<sub>2</sub> and 2 eq. of triethyl amine were added to a solution of **1** in MeOH, a blue-colored species (**2**) with an absorption maximum at 600 nm ( $\epsilon_{600\text{ nm}} = 240\text{ M}^{-1}\text{cm}^{-1}$ ), and a shoulder at 380 nm is observed in the UV/Vis spectrum (Fig. 1 and S1). [H<sub>2</sub>O<sub>2</sub>] dependent studies show that the maximum yield of **2** requires 10 eq. of H<sub>2</sub>O<sub>2</sub> and 2 eq. Et<sub>3</sub>N (Fig. S2). A similar absorption spectrum was reported for [(MeTPEN)Mn<sup>III</sup>-(OO)]<sup>+</sup> in MeCN at -25 °C.<sup>4</sup> ESI-MS studies on the formed species **2** revealed a signal at  $m/z = 510.17$  with the formulation of [(BnTPEN)Mn<sup>III</sup>O<sub>2</sub>]<sup>+</sup>, confirming its presence in the solution (Fig. S3). The perpendicular mode EPR spectrum of species **2** was observed to be silent (Fig. S4). This silent characteristic of the EPR spectrum of **2** confirms the oxidation state of Mn to be +3. The NMR studies revealed the paramagnetic shifted signals in the range of -50 to 100 ppm further validating the +3 oxidation state (*i.e.*,  $S = 2$  system) of **2** (Fig. S5).<sup>5</sup> Based on the similarities in the UV/Vis spectrum of [(MeTPEN)Mn<sup>III</sup>-(OO)]<sup>+</sup> along with ESI-MS, paramagnetic NMR, and EPR analysis, we assigned blue-colored 600 nm absorbing species in the present work to be a [(BnTPEN)Mn<sup>III</sup>-(OO)]<sup>+</sup> (**2**) species.

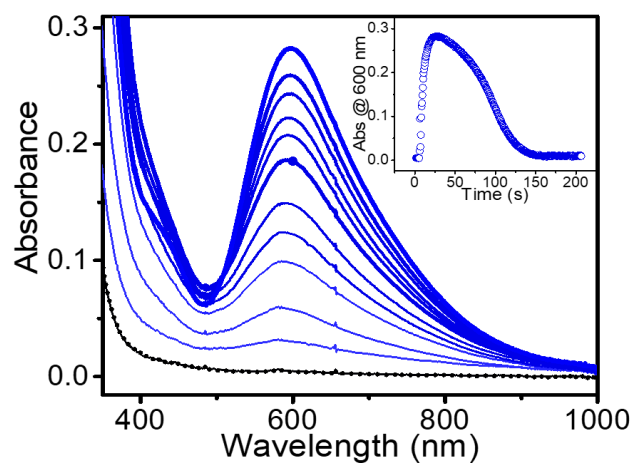

**Figure S1:** UV/Vis absorption spectral changes showing the formation of **2** (blue) by the reaction of **1** (black) with 10 eq. of  $\text{H}_2\text{O}_2$  and 2 eq. of  $\text{Et}_3\text{N}$  in MeOH at room temperature. The inset shows the change in absorbance at 600 nm with time.

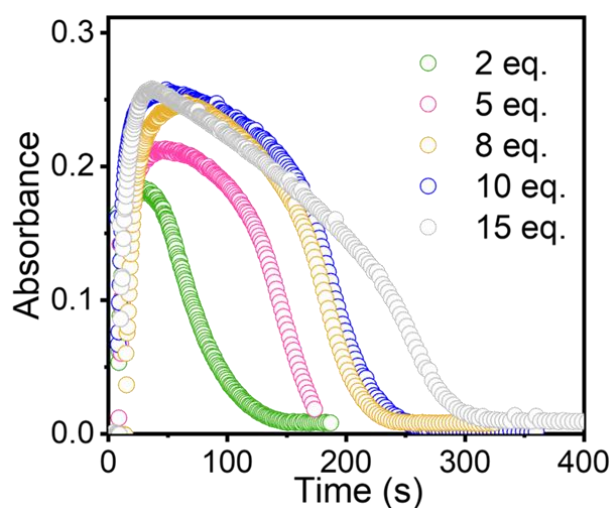

**Figure S2:** Absorbance vs time plot monitoring the formation and decay of 600 nm (**2**) species with different equivalents (2-15 eq.) of hydrogen peroxide and 2 eq. of  $\text{Et}_3\text{N}$  in MeOH at room temperature.

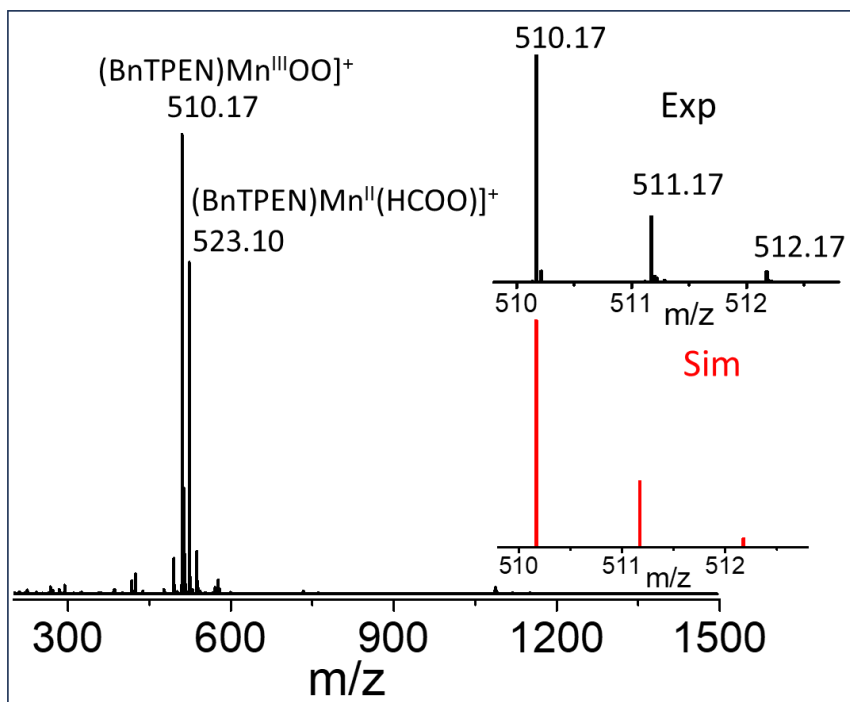

**Figure S3:** ESI-MS data of **2**, generated by the reaction of **1** with 10 eq. of  $\text{H}_2\text{O}_2$  and 2 eq. of  $\text{Et}_3\text{N}$  in MeOH at room temperature. Note: The observation of a signal at  $m/z$  523.10 for  $[(\text{BnTPEN})\text{Mn}(\text{II})(\text{HCOO})]^+$  alongside **2** likely arises from the ESI-MS conditions employed. Formate has been utilized as an ion to facilitate the acquisition of ESI-MS data.

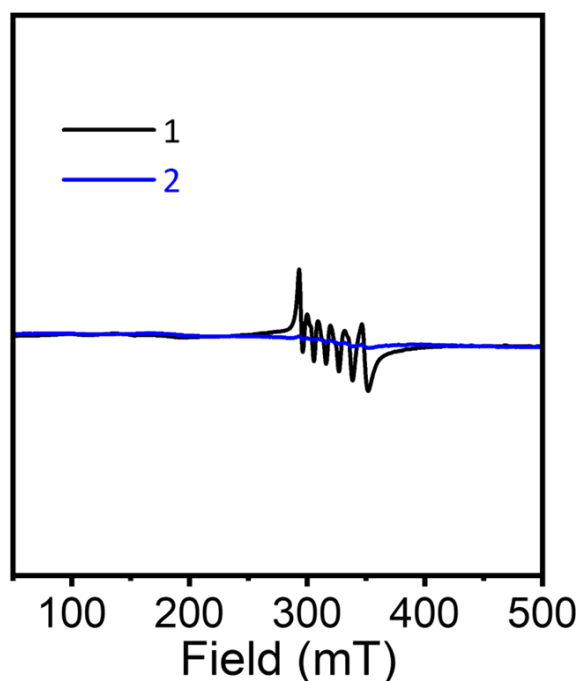

**Figure S4:** Perpendicular mode EPR spectra of **1** (black) and **2** (blue) in MeOH at 77 K. *Conditions to prepare 2:* 2 mM **1** in MeOH + 2 eq.  $\text{Et}_3\text{N}$  + 10 eq.  $\text{H}_2\text{O}_2$  at room temperature.

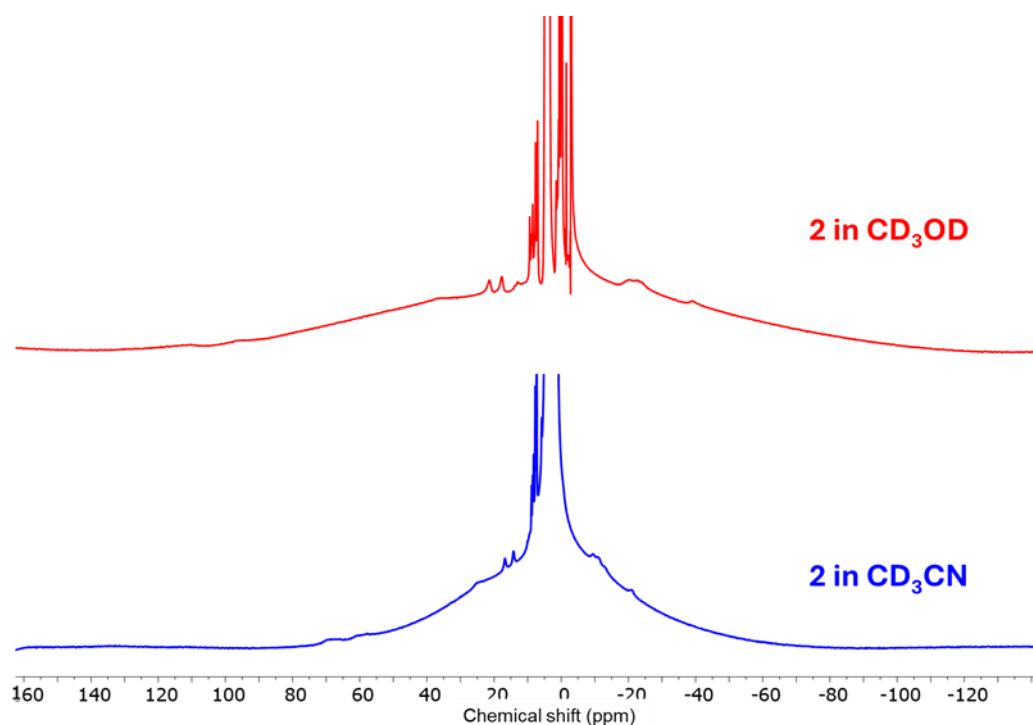

**Figure S5:**  $^1\text{H}$  NMR (400 MHz) spectra of **2** in  $\text{CD}_3\text{CN}$  (blue trace) and in  $\text{CD}_3\text{OD}$  (red trace) at  $-40$  °C. Conditions to prepare **2**: 4 mM **1** in  $\text{CD}_3\text{OD}/\text{CD}_3\text{CN}$  + 2 eq.  $\text{Et}_3\text{N}$  + 10 eq.  $\text{H}_2\text{O}_2$ .

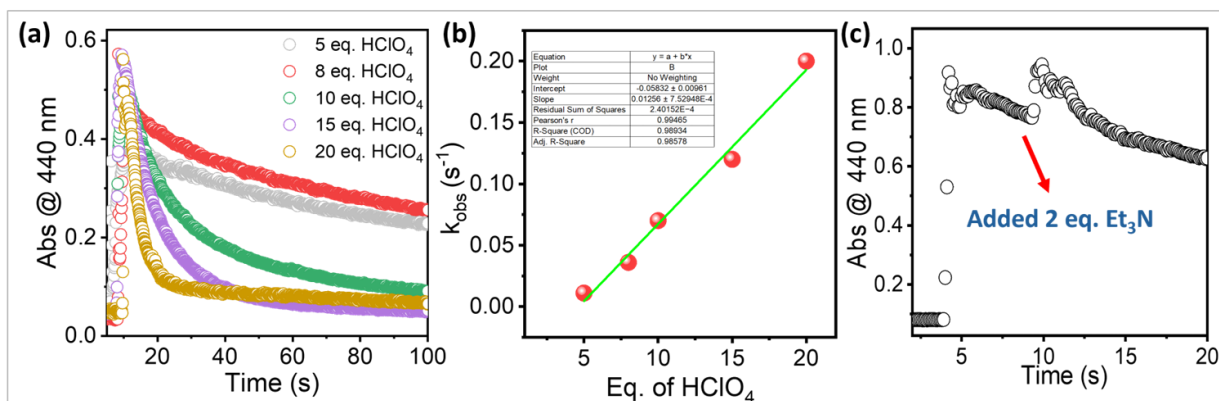

**Figure S6:** (a) Absorbance vs time plot monitoring the formation and decay of 440 nm (**3A**) species with different equivalents of (5-20)  $\text{HClO}_4$  in MeOH at  $-40$  °C. (b) Linear dependence on  $[\text{HClO}_4]$  of the decay rate of 440 nm species at  $-40$  °C. (c) Absorbance vs time plot monitored at 440 nm showing the addition of 2 eq.  $\text{Et}_3\text{N}$  to **3A** in MeOH at  $-40$  °C. Note: The addition of 2 eq. of  $\text{Et}_3\text{N}$  to **3A** did not result in the regeneration of **2** from **3A**. This suggests that an excess of  $\text{Et}_3\text{N}$  (approx. 4 eq.) is necessary to drive the equilibrium (Figure S7).

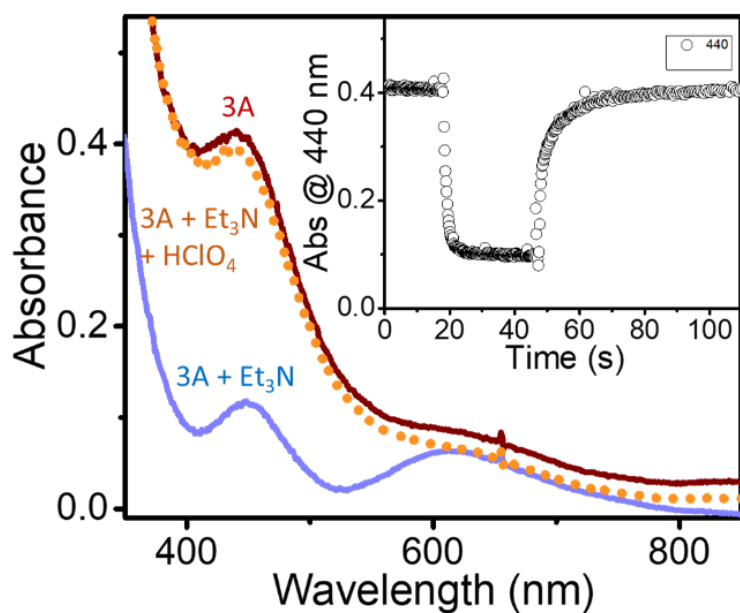

**Figure S7:** UV/Vis absorption spectral changes showing acid-base equilibrium between **2** and **3A** in MeOH at  $-40\text{ }^{\circ}\text{C}$ . The inset shows the change in absorbance at 440 nm vs time.

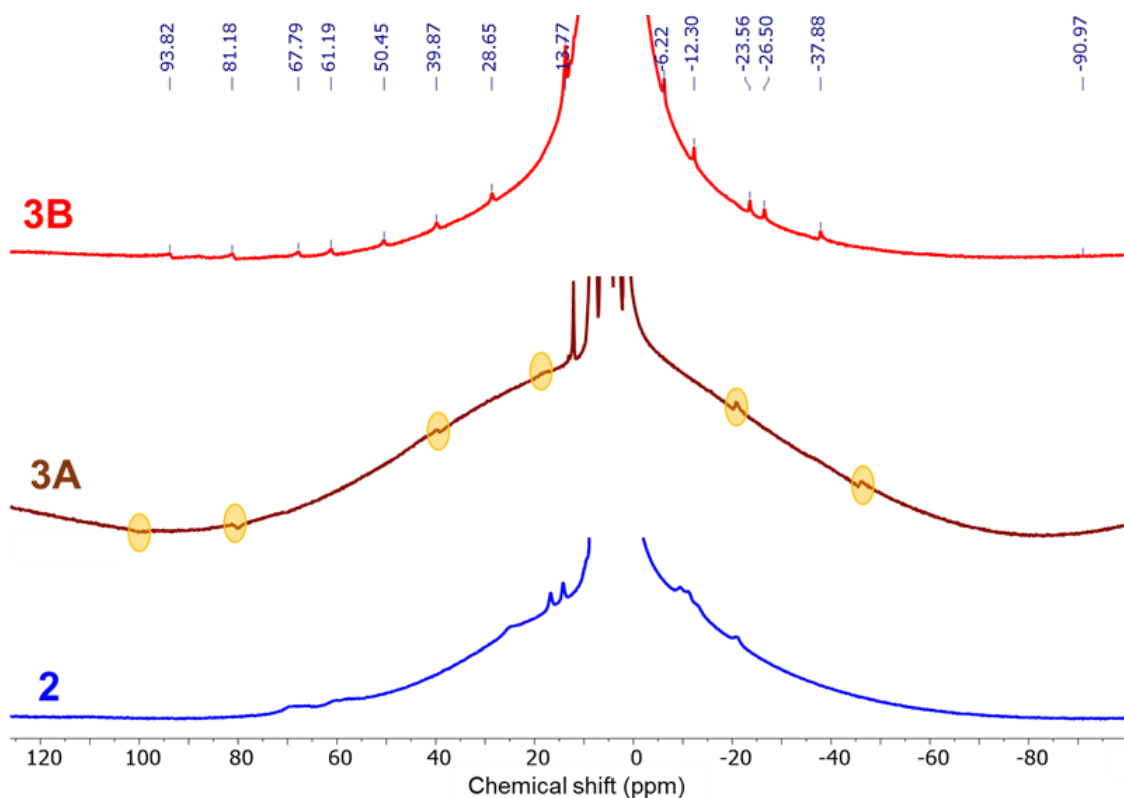

**Figure S8:** <sup>1</sup>H NMR (400 MHz) spectrum of **2** and **3A** and in CD<sub>3</sub>OD and **3B** in CD<sub>3</sub>CN at  $-40\text{ }^{\circ}\text{C}$ . Conditions to prepare **2**: 4 mM **1** + 2 eq. Et<sub>3</sub>N + 10 eq. H<sub>2</sub>O<sub>2</sub> at  $0\text{ }^{\circ}\text{C}$ . Conditions to prepare **3A**: Adding 10 eq. HClO<sub>4</sub> to **2** in CD<sub>3</sub>OD at  $-40\text{ }^{\circ}\text{C}$ . Conditions to prepare **3B**: Addition of 10 eq. HClO<sub>4</sub> to **2** in CD<sub>3</sub>CN at  $-40\text{ }^{\circ}\text{C}$ .

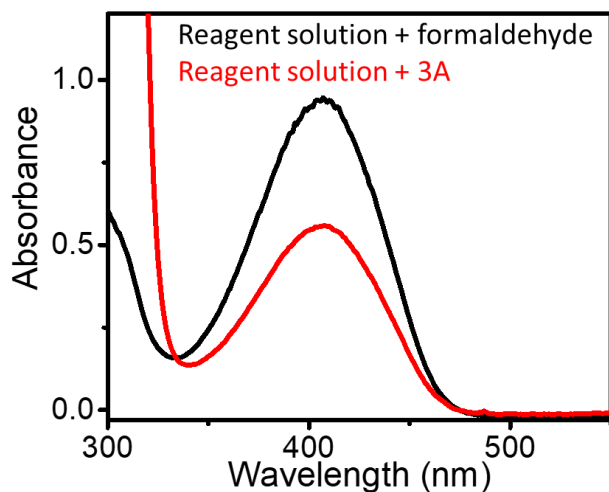

**Figure S9:** UV/Vis absorption spectra showing the formation of 412 nm species with the addition of reagent solution to **3A** in MeOH at 25 °C. The formation of 412 nm species indicates the presence of formaldehyde in the reaction mixture.

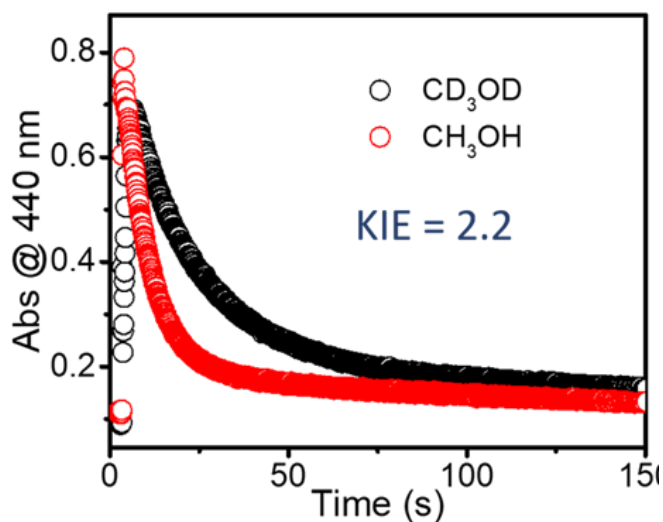

**Figure S10:** Time traces showing the decay of the 440 nm band due to **3A** in  $\text{CH}_3\text{OH}$  (red) and  $\text{CD}_3\text{OD}$  (black).

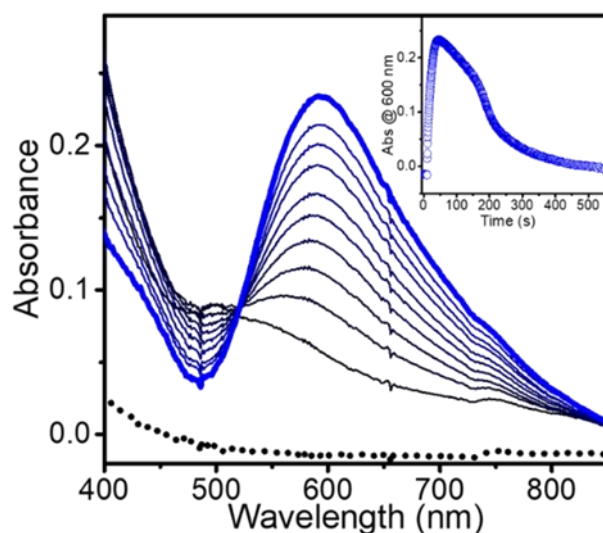

**Figure S11:** UV/Vis absorption spectral changes showing the formation of **2** (blue) by reaction of **1** (black) with 10 eq. of  $\text{H}_2\text{O}_2$  and 2 eq. of  $\text{Et}_3\text{N}$  in MeCN at room temperature. The inset shows the change in absorbance at 600 nm with time.

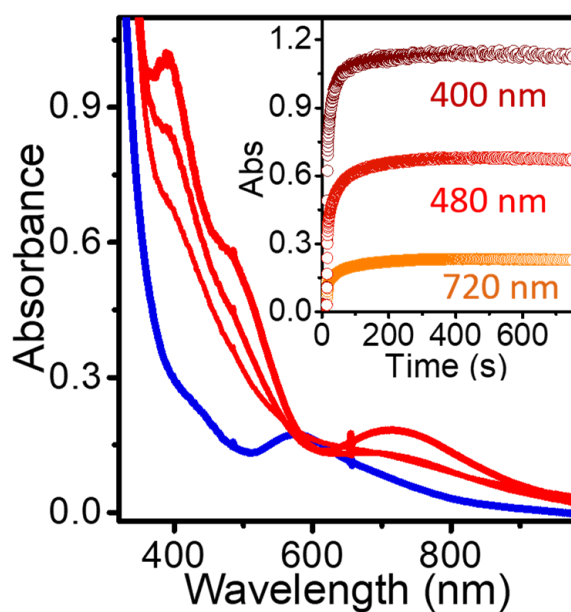

**Figure S12:** UV/Vis absorption spectral changes showing the formation of **3B** after adding 10 eq. of  $\text{HClO}_4$  to **2** in MeCN at  $-40\text{ }^\circ\text{C}$ . *Conditions to generate 2:* **1** + 10 eq. of  $\text{H}_2\text{O}_2$  + 2 eq. of  $\text{Et}_3\text{N}$  in MeCN at room temperature. The inset shows the time traces of 400, 480, and 720 nm bands.



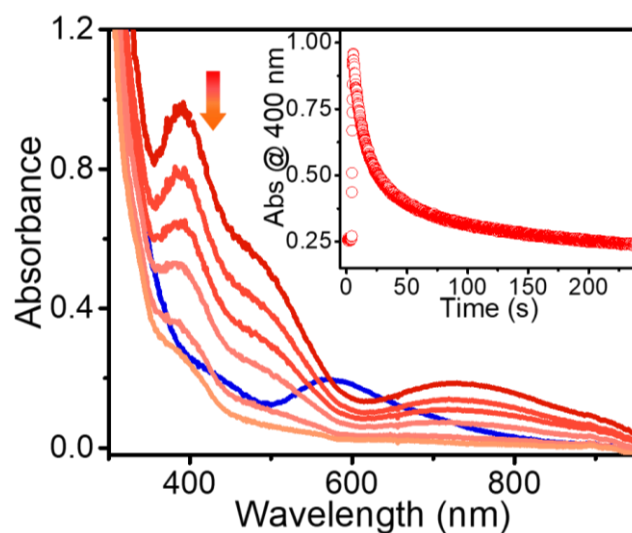

**Figure S13:** UV/Vis absorption spectral changes showing the formation of **3B** after adding 10 eq. of  $\text{HClO}_4$  to **2** in MeCN at room temperature. *Conditions to generate 2:* **1** + 10 eq. of  $\text{H}_2\text{O}_2$  + 2 eq. of  $\text{Et}_3\text{N}$  in MeCN at room temperature. The inset shows the decay of the 400 nm band with time.

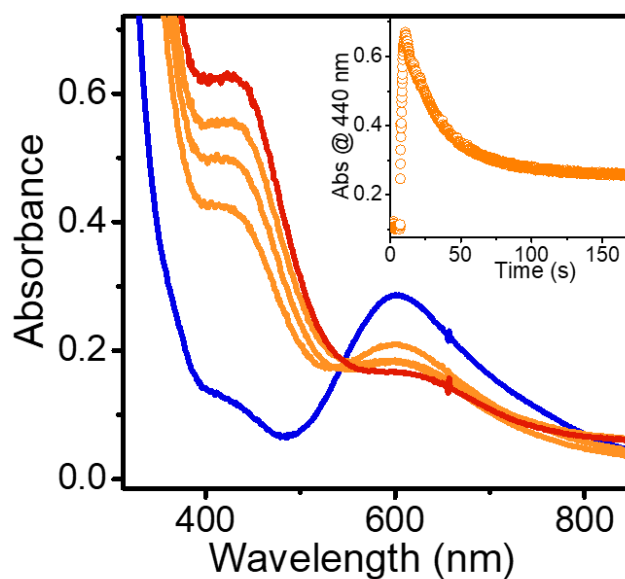

**Figure S14:** UV/Vis absorption spectral changes showing the formation of **3A** after adding 10 eq. of  $\text{HClO}_4$  to **2** in MeCN:MeOH (1:1) at  $-40\text{ }^\circ\text{C}$ . *Conditions to generate 2:* 1 mM **1** + 10 eq. of  $\text{H}_2\text{O}_2$  + 2 eq. of  $\text{Et}_3\text{N}$  in MeCN:MeOH (1:1) at room temperature. The inset shows the decay profile of 440 nm species.

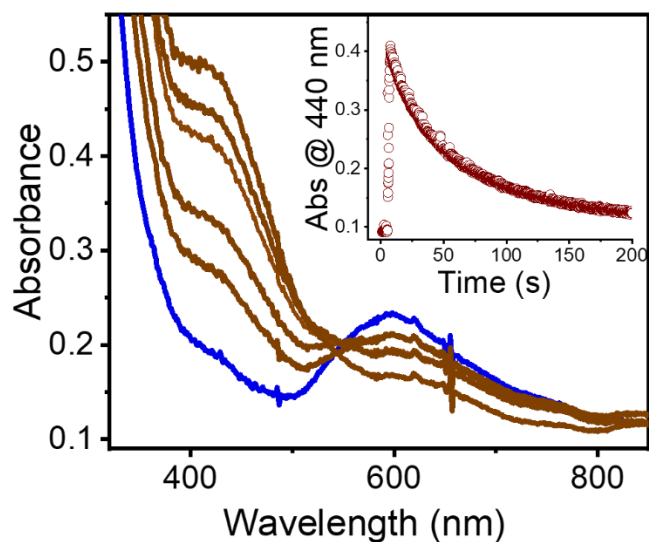

**Figure S15:** UV/Vis absorption spectral changes showing the formation of **3A** after adding 10 eq. of HClO<sub>4</sub> to **2** in MeCN:MeOH (9:1) at -40 °C. *Conditions to generate 2:* 1mM **1** + 10 eq. of H<sub>2</sub>O<sub>2</sub> + 2 eq. of Et<sub>3</sub>N in MeCN:MeOH (9:1) at room temperature. The inset shows the decay profile of 440 nm species.

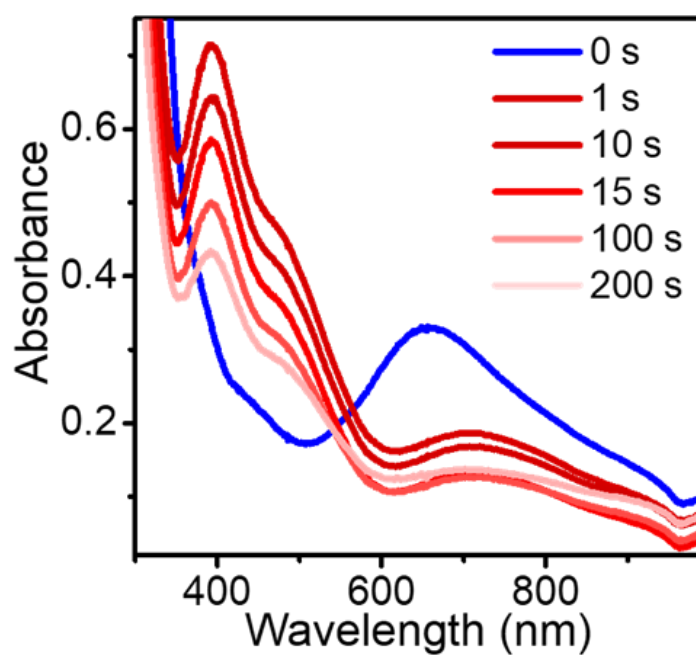

**Figure S16:** UV/Vis absorption spectral changes showing the formation and decay of **3B** after adding 20 eq. of HClO<sub>4</sub> to **2** (blue trace) in H<sub>2</sub>O at 5 °C. *Conditions to generate 2:* 1 mM **1** + 10 eq. of H<sub>2</sub>O<sub>2</sub> + 5 eq. of Et<sub>3</sub>N in H<sub>2</sub>O at room temperature.

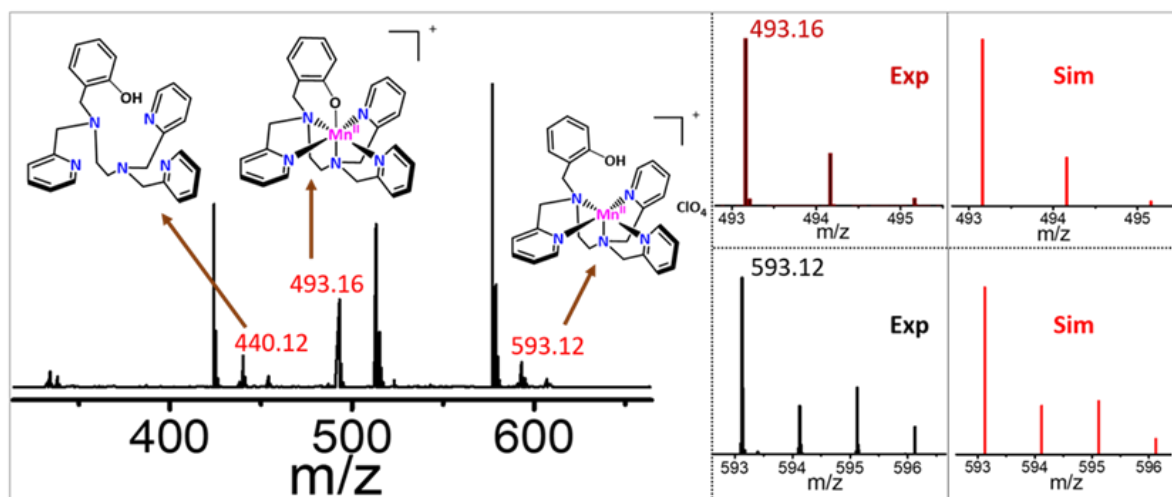

**Figure S17:** ESI-MS analysis of **3B** in MeCN. Conditions to generate **3B**: **2** + 10 eq. of  $\text{HClO}_4$  in MeCN  
 Conditions to generate **2**: **1** + 10 eq. of  $\text{H}_2\text{O}_2$  + 2 eq. of  $\text{Et}_3\text{N}$  in MeCN.

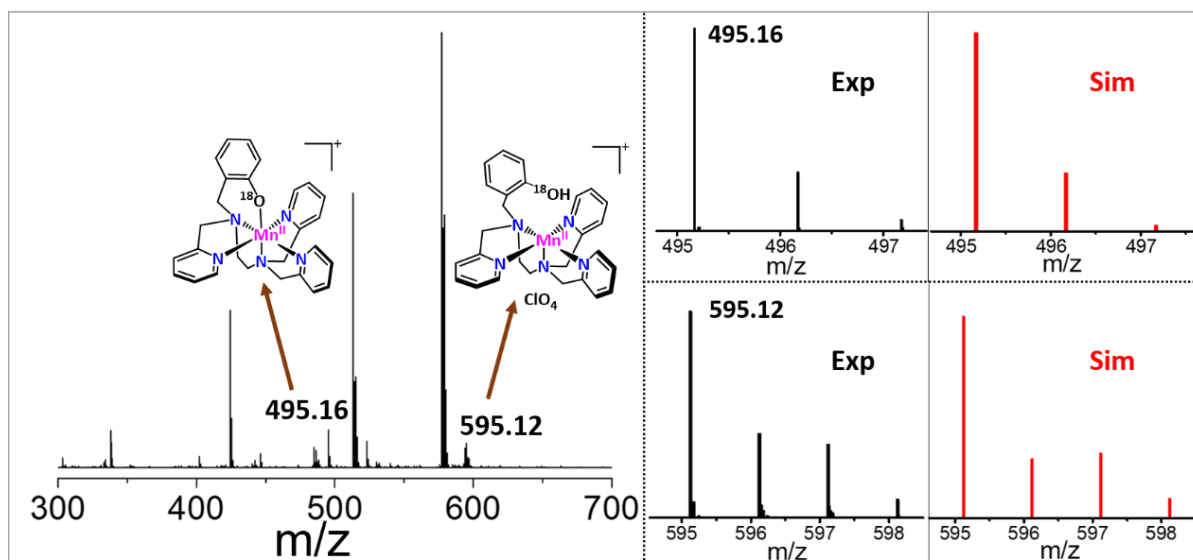

**Figure S18:** ESI-MS analysis of  $^{18}\text{O}$ -**3B** in MeCN. Conditions to generate  $^{18}\text{O}$ -**3B**: **2** + 10 eq. of  $\text{HClO}_4$  in MeCN  
 Conditions to generate **2**: **1** + 10 eq. of  $\text{H}_2^{18}\text{O}_2$  + 2 eq. of  $\text{Et}_3\text{N}$  in MeCN.

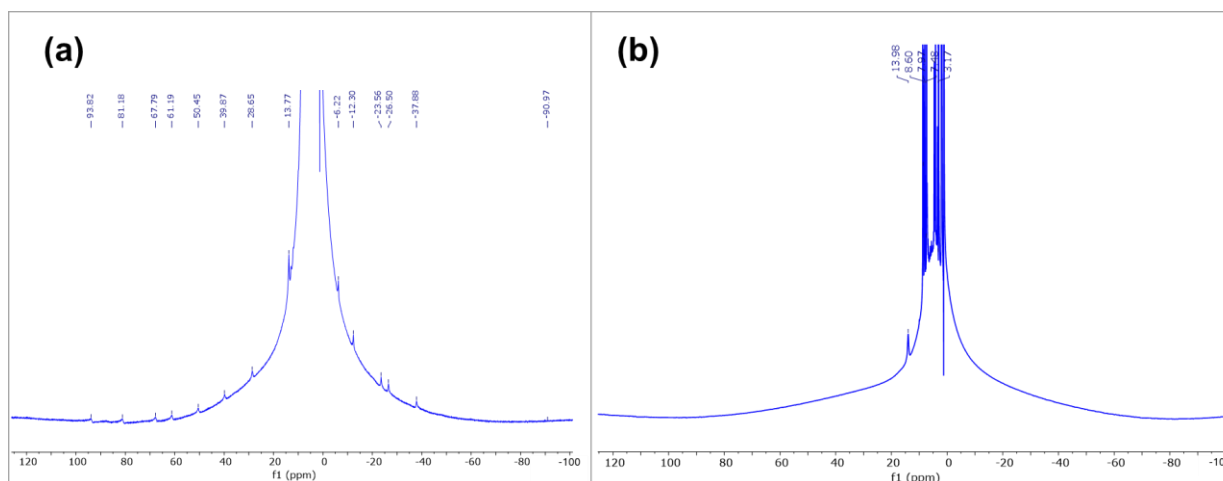

**Figure S19:** (a)  $^1\text{H}$  NMR (400 MHz) spectra of **3B** in  $\text{CD}_3\text{CN}$  at  $-40\text{ }^\circ\text{C}$ . (b)  $^1\text{H}$  NMR (400 MHz) spectra of a decayed sample of **3B** in  $\text{CD}_3\text{CN}$  at  $-40\text{ }^\circ\text{C}$ . *Conditions to prepare 3B:* Addition of 10 eq.  $\text{HClO}_4$  to **2** in  $\text{CD}_3\text{CN}$  at  $-40\text{ }^\circ\text{C}$ . *Conditions to prepare 2:* 4 mM **1** + 2 eq.  $\text{Et}_3\text{N}$  + 10 eq.  $\text{H}_2\text{O}_2$  in  $\text{CD}_3\text{CN}$ .

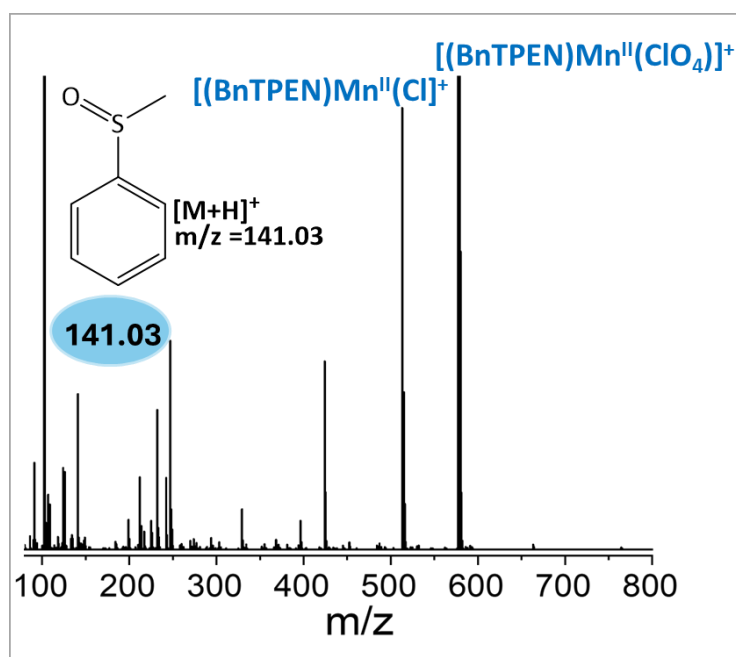

**Figure S20:** Product analysis of the reaction mixture of **2** + 50 eq. of thioanisole + 10 eq. of  $\text{HClO}_4$  by ESI-MS. *Conditions to generate 2:* **1** + 10 eq. of  $\text{H}_2\text{O}_2$  + 2 eq. of  $\text{Et}_3\text{N}$  in  $\text{MeCN}$ .

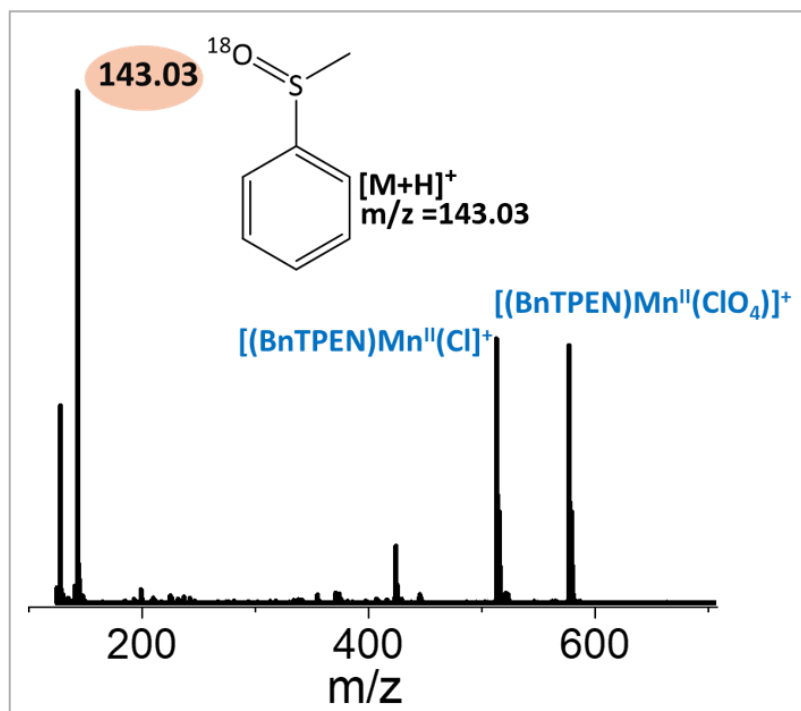

**Figure S21:** Product analysis of the reaction mixture of **2** + 50 eq. of thioanisole + 10 eq. of  $\text{HClO}_4$  by ESI-MS. Conditions to generate **2**: **1** + 10 eq. of  $\text{H}_2^{18}\text{O}_2$  + 2 eq. of  $\text{Et}_3\text{N}$  in MeCN.

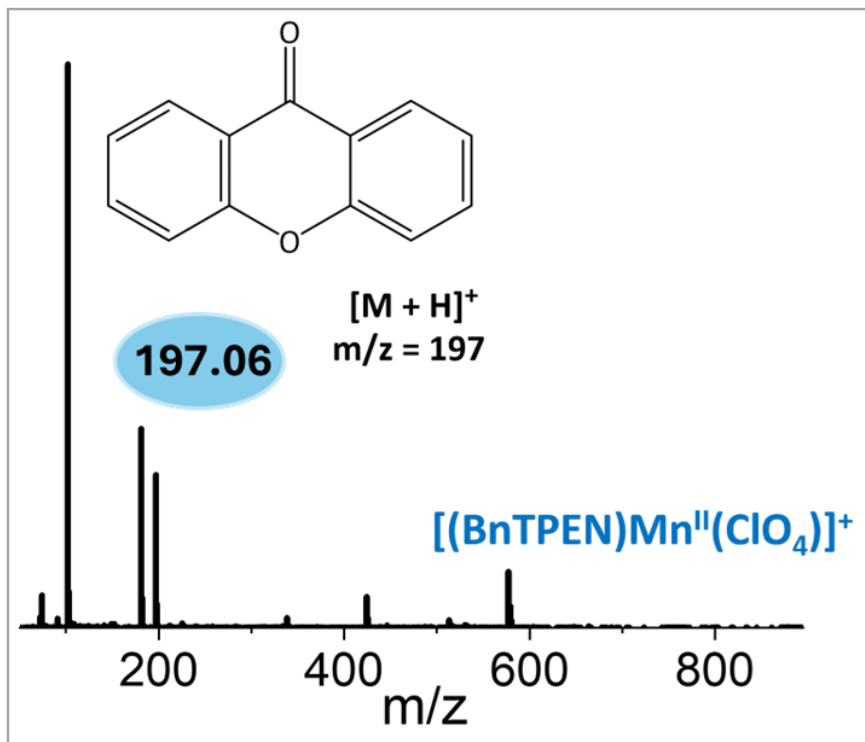

**Figure S22:** Product analysis of the reaction mixture of **2** + 50 eq. of xanthene + 10 eq. of  $\text{HClO}_4$  by ESI-MS. Conditions to generate **2**: **1** + 10 eq. of  $\text{H}_2\text{O}_2$  + 2 eq. of  $\text{Et}_3\text{N}$  in MeCN.

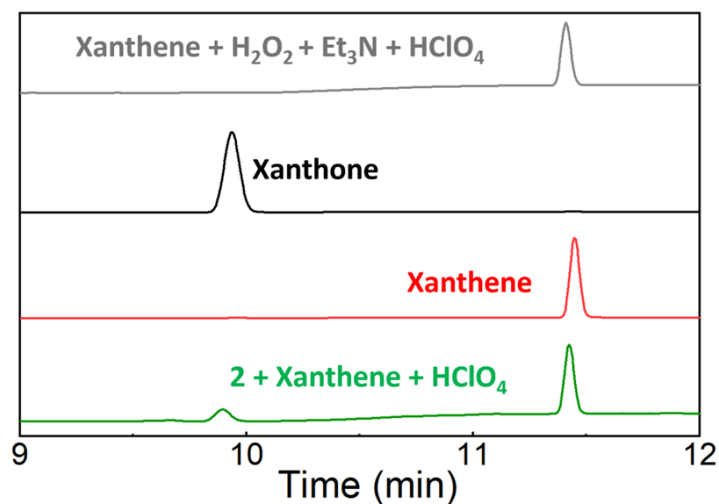

**Figure S23:** Product analysis of the reaction mixture of xanthene with **2** in the presence of 10 eq.  $\text{HClO}_4$  in  $\text{CH}_3\text{CN}$  (green),  $\text{H}_2\text{O}_2$  in the presence of eq.  $\text{Et}_3\text{N}$  and  $\text{HClO}_4$  with 10 eq. xanthene without Mn complex under the same conditions (grey), xanthone (black), and xanthene in  $\text{CH}_3\text{CN}$  by HPLC. Note: HPLC analysis confirms that  $\text{H}_2\text{O}_2$  in the presence of  $\text{HClO}_4$  and  $\text{Et}_3\text{N}$  cannot convert xanthene to xanthone. This suggests that without the Mn complex, oxidants are incapable of oxidizing xanthene to xanthone.

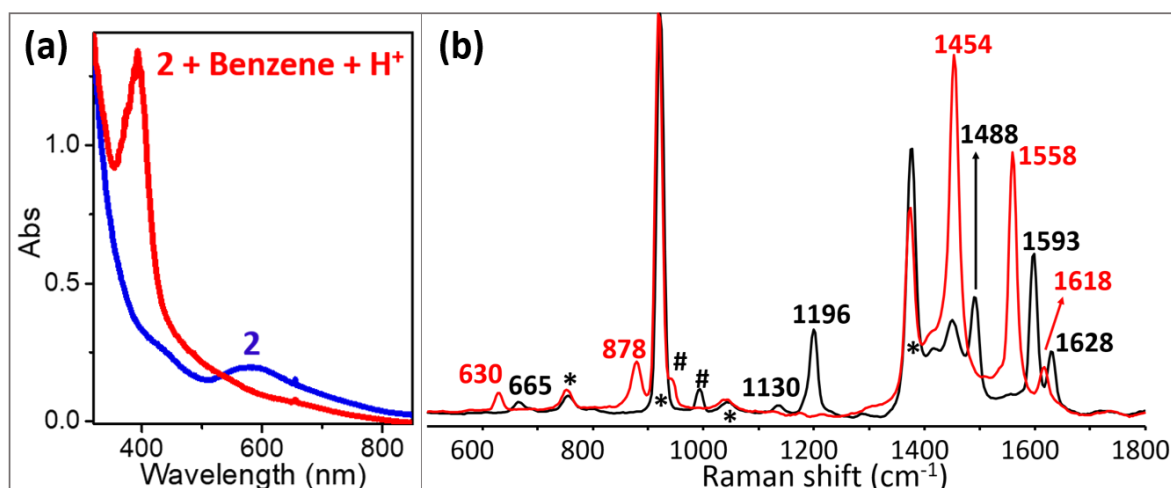

**Fig. S24:** (a) UV/Vis absorption spectral changes showing the formation of 390 nm species. (b) Resonance Raman spectra of 390 nm species using  $\lambda_{\text{exc}} = 405 \text{ nm}$  in MeCN at  $-40 \text{ }^\circ\text{C}$ . \* Indicate solvent peak and # indicate reagent (benzene) peak. Condition to generate 390 nm species: 1 mM **2** + 50 eq. of benzene + 10 eq. of  $\text{HClO}_4$  in MeCN at  $-40 \text{ }^\circ\text{C}$ . Condition to generate **2**: 1 mM **1** + 10 eq. of  $\text{H}_2\text{O}_2$  + 2 eq. of  $\text{Et}_3\text{N}$  in MeCN at room temperature.

Even lower amounts of H<sub>2</sub>O<sub>2</sub> (2 eq.) can generate species **2**, albeit with a reduced yield. Using a lower concentration of H<sub>2</sub>O<sub>2</sub> (2 eq.) in the presence of Et<sub>3</sub>N and HClO<sub>4</sub> still allows for the oxidation of substrates (such as benzene) but results in a decreased yield of the substrate-oxidized product (390 nm species) (Figure S25).

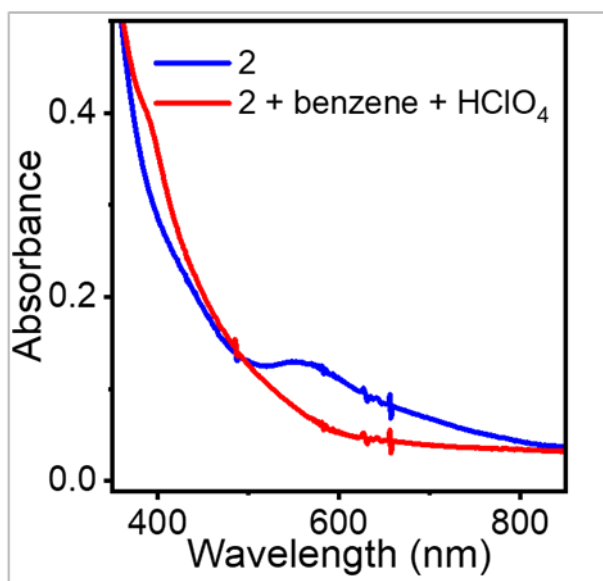

**Figure S25:** UV/Vis absorption spectra showing the formation of 390 nm species with low yield upon adding 10 eq. HClO<sub>4</sub> to **2** produced using 2 eq. of H<sub>2</sub>O<sub>2</sub> + 2 eq. of Et<sub>3</sub>N. Condition to generate 390 nm species: 1 mM **2** + 50 eq. of benzene + 10 eq. of HClO<sub>4</sub> in MeCN at -40 °C. Condition to generate **2**: 1 mM **1** + 2 eq. of H<sub>2</sub>O<sub>2</sub> + 2 eq. of Et<sub>3</sub>N in MeCN at room temperature.

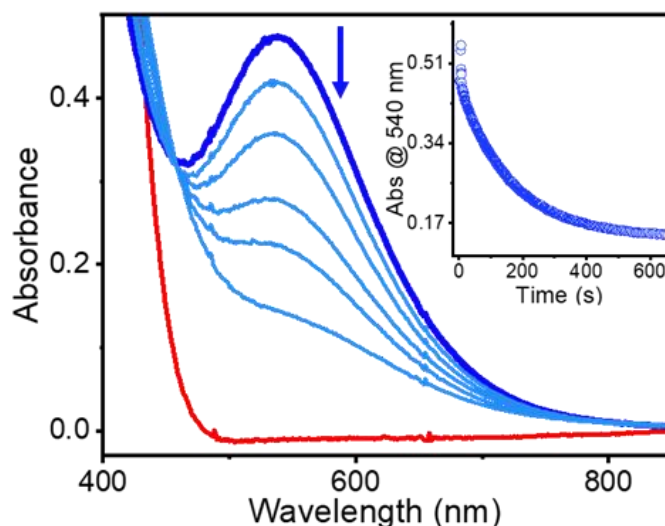

**Figure S26:** UV/Vis absorption spectral changes showing the decay of 540 nm band after adding 1 eq. of HClO<sub>4</sub> to [(BnTPEN)Fe<sup>III</sup>-OOH]<sup>2+</sup> in MeOH at 0 °C. Conditions to generate [(BnTPEN)Fe<sup>III</sup>-OOH]<sup>2+</sup>: (BnTPEN)Fe<sup>II</sup> + 10 eq. of H<sub>2</sub>O<sub>2</sub> in MeOH at 0 °C.

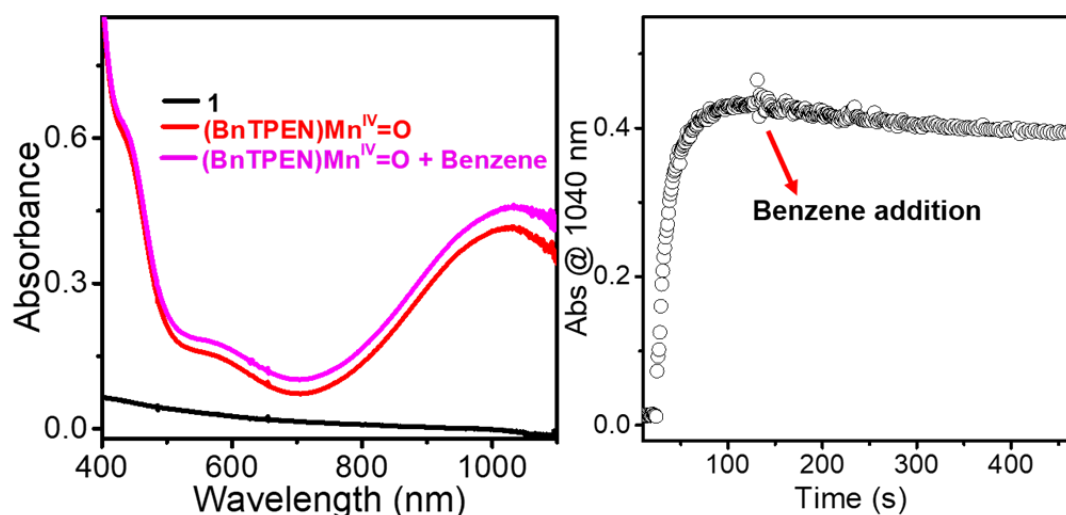

**Figure S27:** (left) UV/Vis absorption spectral changes showing the reaction of  $[(\text{BnTPEN})\text{Mn}^{\text{IV}}=\text{O}]^{2+}$  (red) with benzene (pink). (right) The corresponding changes in absorbance at 1040 nm over time. *Condition to generate  $[(\text{BnTPEN})\text{Mn}^{\text{IV}}=\text{O}]^{2+}$ : 2 mM **1** + 2.5 eq. of PhIO in TFE at room temperature.*

Nam and co-workers have reported that the addition of HOTf to  $[(\text{BnTPEN})\text{Mn}^{\text{IV}}=\text{O}]^{2+}$  (at 1020 nm) in a 1:1 mixture of TFE and MeCN resulted in the formation of a band at 580 nm, attributed to  $[(\text{BnTPEN})\text{Mn}^{\text{IV}}=\text{O} \bullet \bullet \bullet (\text{HOTf})_2]^{2+}$ .<sup>6</sup> Following the literature methodology, we generated 580 nm absorbing species by adding 10 eq. of  $\text{HClO}_4$  to  $[(\text{BnTPEN})\text{Mn}^{\text{IV}}=\text{O}]^{2+}$  in TFE, resulting in the appearance of a band at 580 nm at room temperature. Upon the addition of benzene to the 580 nm species, there was no alteration in the decay rate of the 580 nm band (Figure S28). Furthermore, the absence of the appearance of the 390 nm band suggests that  $\text{Mn}^{\text{IV}}$ -oxo is not capable of oxidizing benzene in TFE, even in the presence of 10 eq. of  $\text{HClO}_4$ . It could be argued that TFE might pose challenges during the reactivity. For a more appropriate comparison, MeCN would be an ideal choice.

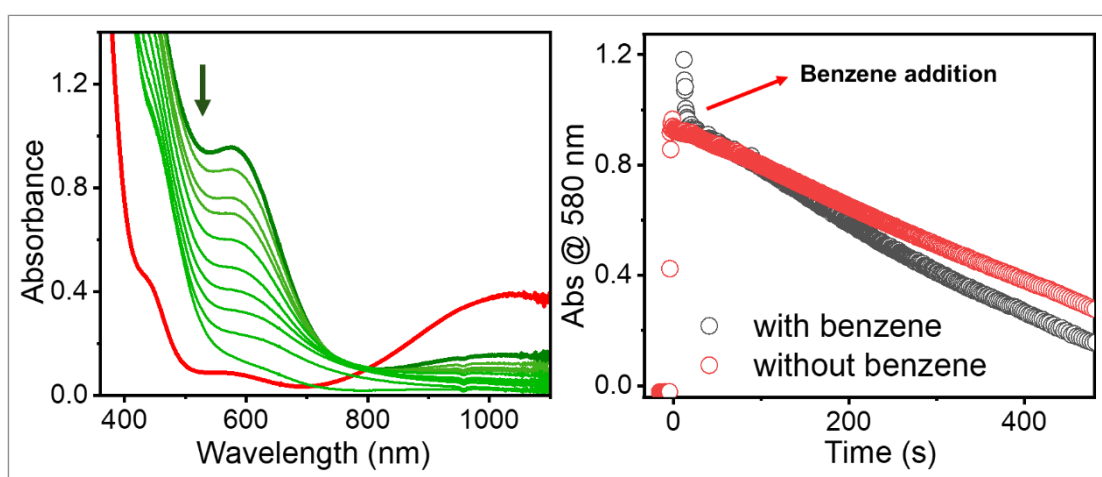

**Figure S28:** (a) UV-Vis spectrum depicting the formation of 580 nm band upon the addition of 10 eq.  $\text{HClO}_4$  to  $(\text{BnTPEN})\text{Mn}^{\text{IV}}=\text{O}$  (red) in TFE at RT. *Conditions to generate  $(\text{BnTPEN})\text{Mn}^{\text{IV}}=\text{O}$ : 1 mM **1** + 2.5 eq. PhIO in TFE at RT.* (b) Time traces depicting the decay profile of 580 nm species in the presence (black) and absence (red) of 50 eq. of benzene as a substrate.



Our research group recently reported the generation of (BnTPEN)Mn<sup>IV</sup>-OH (which absorbs at 620 nm) by adding HClO<sub>4</sub> to (BnTPEN)Mn<sup>III</sup>-O-Ce<sup>IV</sup> in MeCN at room temperature.<sup>5</sup> The addition of benzene to (BnTPEN)Mn<sup>IV</sup>-OH in MeCN did not alter the decay profile of the 620 nm band for Mn<sup>IV</sup>-OH (Figure S29). This experiment also suggests that (BnTPEN)Mn<sup>IV</sup>-OH in the MeCN complex is not capable of oxidizing phenyl rings either intramolecularly or intermolecularly.

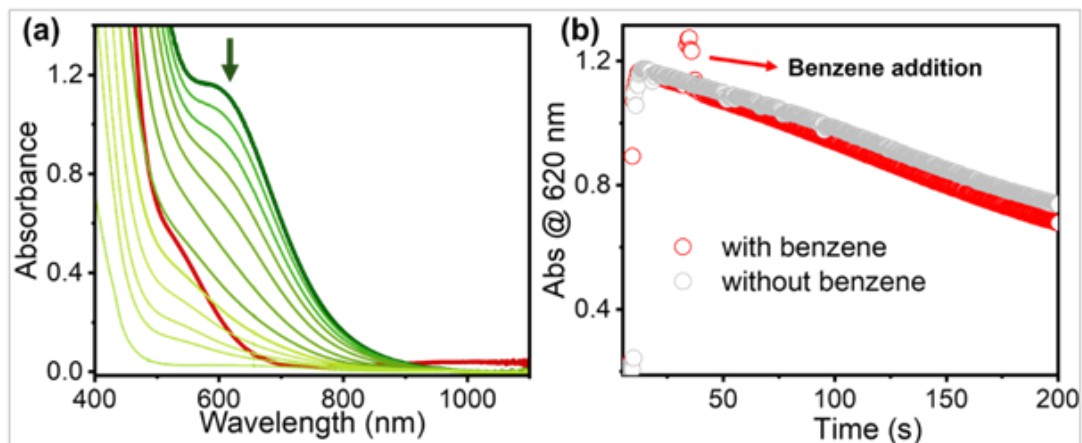

**Figure S29:** (a) UV-Vis spectrum depicting the formation of 620 nm band upon the addition of 10 eq. HClO<sub>4</sub> to (BnTPEN)Mn<sup>III</sup>-O-Ce<sup>IV</sup> (red) in CH<sub>3</sub>CN at RT. Conditions to generate (BnTPEN)Mn<sup>III</sup>-O-Ce<sup>IV</sup>: 1mM **1** + 20  $\mu$ l H<sub>2</sub>O + 4 eq. CAN in CH<sub>3</sub>CN at RT. (b) Time traces depicting the decay profile of 620 nm species in the absence (black) and presence (red) of 50 eq. of benzene as a substrate.

The potential involvement of hydroxyl radicals can be assessed using the method described by Indra and co-workers.<sup>7</sup> Terephthalic acid can serve as a radical trap to detect hydroxyl radicals formed in the solution. In the presence of OH<sup>•</sup> radicals, terephthalic acid is oxidized to 2-hydroxyterephthalic acid, which exhibits a characteristic emission peak at 439.4 nm in the fluorescence spectrum. However, our experiments showed no evidence of 2-hydroxyterephthalic acid (emission peak at 439.4 nm) in the solution of **3A** and **3B** when terephthalic acid was added (Figure S30). These findings may suggest that there is no homolysis of Mn<sup>III</sup>-OOH occurring in this case.

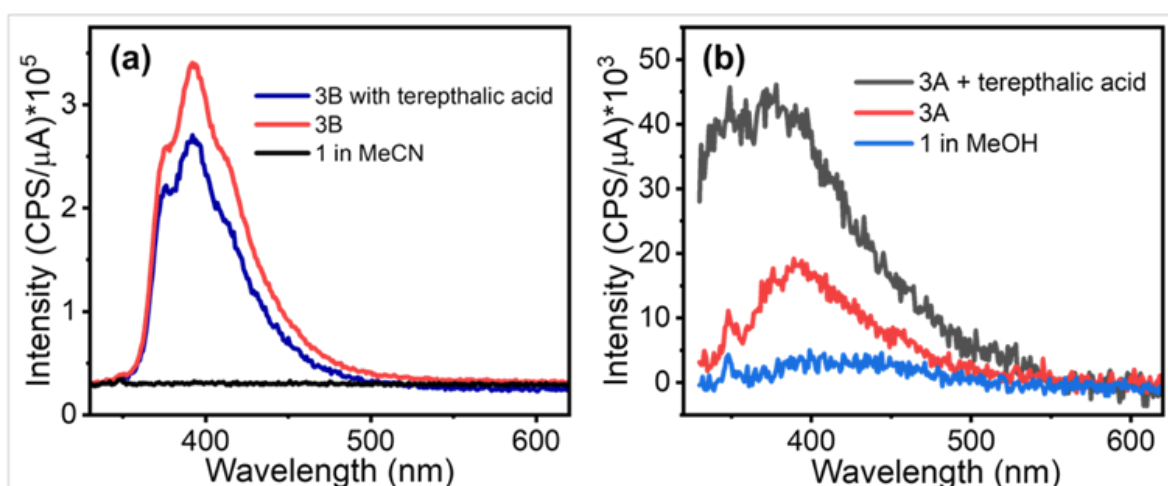

**Figure S30:** (a) Fluorescence spectrum of **1** in MeCN (black), **3B** (red), a mixture of terephthalic acid, and **3B** (blue) in MeCN. (b) Fluorescence spectrum of **1** in MeOH (blue), **3A** (red), a mixture of terephthalic acid, and **3A** (black) in MeOH.

### Computational methods:

All geometries optimizations and frequency computations were performed in Gaussian16, with B3LYP as the functional using the unrestricted formalism with Grimme's D3 empirical dispersion with Becke-Johnson correction and def2-SVP as the basis set. Solvent effects were accounted for using the polarized continuum model as implemented in Gaussian 16. Single points were computed using B3LYP functional with Grimme's D3 empirical dispersion with Becke-Johnson correction and 6-311+G(d,p) basis set. Acetonitrile was used as the solvent for all computations. Ultrafine grid was used for all computations. Stability analysis was performed to verify the stability of the wave function. XQC and YQC algorithms were used when necessary for scf convergence.

### Key words used:

For optimizations:

```
#P B3LYP def2SVP opt freq=noraman scrf=(pcm,solvent-acetonitrile) empiricaldispersion=gd3bj
```

For stability analysis,

```
Stable = opt
```

```
For single points: #P UB3LYP ginput IOP(6/7=3) 6-311+G(d,p) empiricaldispersion=gd3bj
```

```
For TS search: #p opt=(calcfc,ts,noeigen,nofreeze) freq=noraman ub3lyp  
scrf=(solvent=acetonitrile,pcm) def2svp empiricaldispersion=gd3bj
```

Transition state search for the oxidation of the pendant benzyl group of the ligand by the putative Mn(V)=O oxo species. Two mechanistic pathways were conceived for this process viz., (I) the direct hydrogen atom abstraction by Mn(V)=O (TS<sub>HAT</sub>) and (II) S<sub>RN</sub>1 type attack of Mn(V)=O species on the benzyl group (TS<sub>SRN1</sub>) followed by hydrogen atom abstraction. Investigating these two pathways using computations revealed that TS<sub>SRN1</sub> is the favored pathway by 10.9 kcal/mol compared to TS<sub>HAT</sub>. These TSS energies are reported with respect to each other ( $\Delta\Delta G^\ddagger$ ) to compare them with each other. Further details related to the energy profile are currently underway along with a more rigorous computational treatment for the system.

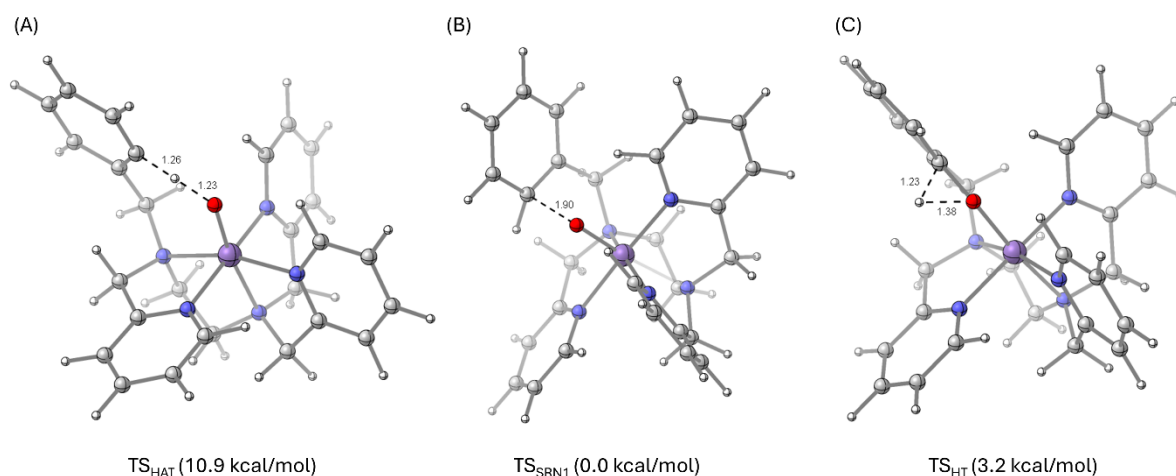

**Figure S31:** TS for the oxidation of the phenyl group on the triplet surface computed at UB3LYP-D3BJ/6-311+G(d,p)//PCM(CH<sub>3</sub>CN)-UB3LYP-D3BJ/def2-SVP level of theory.

Deuterium kinetic isotope effects were predicted using Mayer-Bigeleisen equations<sup>8</sup> as implemented in isoeff. The following input file was used for computing the deuterium isotope effects

```
$GLOBAL MEMORY=2000000 $END
  $IODEF SSINP = Methanol.log TSINP = kie_OSS_HAT_Oxo_G2.log $END

-----1-2H-----
  $ISOEFF HMASS(2) = 2 HMATS(65) = 2 KIE= .T. EIE= .F. $END
  $ISOEFF HMASS(3) = 2 HMATS(66) = 2 KIE= .T. EIE= .F. $END
  $ISOEFF HMASS(4) = 2 HMATS(67) = 2 KIE= .T. EIE= .F. $END
  $ISOEFF HMASS(6) = 2 HMATS(69) = 2 KIE= .T. EIE= .F. $END
  $ISOEFF SCFACT=0.9614 $END
  $ISOEFF TKELV(1) = 298 $END
```

-\$-

Key portions of output from isoeff:

```
SSFACT = 0.9614
TSFACT = 0.9614

ISOTOPE EFFECT(298.00) = 2.587711
```

**Table S1:** Table with the raw energies for the key transition states reported in the manuscript.

| File                   | Free Energy Correction (Hartree) | Single Point (Hartree) | SP+G (Hartree) |
|------------------------|----------------------------------|------------------------|----------------|
| TS <sub>Methanol</sub> | 0.522834                         | -2661.686143           | -2661.163309   |
| TS <sub>HAT</sub>      | 0.465763                         | -2545.913625           | -2545.447862   |
| TS <sub>SRN1</sub>     | 0.473876                         | -2545.93911            | -2545.465234   |
| TS <sub>HT</sub>       | 0.470724                         | -2545.930808           | -2545.460084   |

## References

- 1 T. Nash, *Nature*, 1952, **170**, 976.
- 2 J. Chen, S. Stepanovic, A. Draksharapu, M. Gruden, and W. R. Browne, *Angew. Chem. Int. Ed.*, 2018, **57**, 3207-3211.
- 3 D. B. Rice, A. A. Massie and T. A. Jackson, *Acc. Chem. Res.*, 2017, **50**, 2706–2717.
- 4 S. Groni, P. Dorlet, G. Blain, S. Bourcier, R. Guillot and E. Anxolabéhère-Mallart, *Inorg. Chem.*, 2008, **47**, 3166–3172.
- 5 S. Gupta, P. Arora, R. Kumar, A. Awasthi, B. Chandra, R. Eerlapally, J. Xiong, Y. Gou, L. Que Jr., A. Draksharapu, *Angew. Chem. Int. Ed.*, 2024, **63**, e20231637.

- 6 J. Chen, H. Yoon, Y. M. Lee, M. S. Seo, R. Sarangi, S. Fukuzumi and W. Nam, *Chem. Sci.*, 2015, **6**, 3624–3632.
- 7 V. Vyas, V. Kumar and A. Indra, *Chem. Commun.*, 2024, **60**, 2544–2547.
- 8 J. Bigeleisen, and M. G. Mayer, *J. Chem. Phys.* 1947, **15**, 261– 267.
- 9 S. H. Vosko, L. Wilk, and M. Nusair, *Can. J. Phys.*, 1980, **58**, 1200-1211.
- 10 P. J. Stephens, F. J. Devlin, C. F. Chabalowski, and M. J. Frisch, *J. Phys. Chem.*, 1994, **98**, 11623-11627.
- 11 S. Grimme, J. Antony, S. Ehrlich and H. Krieg, *J. Chem. Phys.*, 2010, **132**, 154104.
- 12 F. Weigend, and R. Ahlrichs, *Phys. Chem. Chem. Phys.*, 2005, **7**, 3297-3305.
- 13 J. Tomasi, B. Mennucci, and R. Cammi, *Chem. Rev.* 2005, **105**, 2999– 3094.

### XYZ Coordinates:

69

TS<sub>Methanol</sub>

69

```
Final Energy =          -2661.6861432900
C          -3.3161500      -0.0766000      -0.9059820
C          -3.4033560      -0.1969400       1.4403190
C          -4.7911530      -0.2621910       1.4157920
C          -5.4493030      -0.2293950       0.1850220
C          -4.7012950      -0.1416480      -0.9916290
H          -2.8396850      -0.2158390       2.3728070
H          -5.3394470      -0.3390640       2.3547530
H          -6.5382820      -0.2817710       0.1385730
H          -5.1804780      -0.1296710      -1.9707940
C          -2.3924920       0.0376290      -2.0835630
H          -2.1907350       1.0936320      -2.3094590
H          -2.8257740      -0.4073560      -2.9906960
N          -1.1187690      -0.6284620      -1.7084880
C           0.0437810      -0.1774980      -2.5208680
H           0.0364540      -0.6552310      -3.5121020
H          -0.0419660       0.9033680      -2.6841470
C           1.3016190      -0.5366230      -1.7663490
H           1.3866820      -1.6251570      -1.6633150
H           2.1961690      -0.1893640      -2.2997240
N           1.2742170       0.0454350      -0.3812710
C          -1.2945340      -2.1114270      -1.7611120
H          -0.7876410      -2.5242960      -2.6449640
H          -2.3626190      -2.3395940      -1.8907720
C          -0.8388190      -2.7884050      -0.5067840
C          -0.7158130      -4.1746680      -0.4230960
C          -0.3928120      -4.7542040       0.8012220
H          -0.8833850      -4.7832320      -1.3120270
C          -0.3241660      -2.5589110       1.7621610
C          -0.2059960      -3.9309760       1.9157480
H          -0.2928130      -5.8374120       0.8875070
```

|    |            |            |            |
|----|------------|------------|------------|
| H  | -0.1718950 | -1.8730330 | 2.5953930  |
| H  | 0.0375540  | -4.3417770 | 2.8955810  |
| C  | 1.6650580  | 1.4851050  | -0.3903860 |
| H  | 2.4761960  | 1.6623410  | -1.1083630 |
| H  | 2.0514120  | 1.7456360  | 0.6060020  |
| C  | 2.2085920  | -0.7317490 | 0.5374560  |
| H  | 1.9104250  | -1.7820470 | 0.4710560  |
| H  | 2.0098100  | -0.3798580 | 1.5561370  |
| C  | 0.5042880  | 2.3929780  | -0.6230610 |
| C  | 0.6617330  | 3.7077470  | -1.0536150 |
| C  | -1.7846900 | 2.7329290  | -0.2611180 |
| C  | -0.4480850 | 4.5491800  | -1.0792000 |
| H  | 1.6490720  | 4.0613260  | -1.3507360 |
| C  | -1.6884090 | 4.0559620  | -0.6607350 |
| H  | -2.7329980 | 2.3191190  | 0.0739370  |
| H  | -0.3471200 | 5.5831190  | -1.4130460 |
| H  | -2.5779070 | 4.6853870  | -0.6444090 |
| C  | 3.6693820  | -0.5792910 | 0.1967390  |
| C  | 4.2710770  | -1.3949480 | -0.7755570 |
| C  | 4.4547190  | 0.3756730  | 0.8618470  |
| C  | 5.6209280  | -1.2383650 | -1.0956700 |
| H  | 3.6890450  | -2.1709580 | -1.2766530 |
| C  | 5.8052390  | 0.5317950  | 0.5440190  |
| H  | 4.0144310  | 0.9922110  | 1.6485470  |
| C  | 6.3888710  | -0.2701770 | -0.4411490 |
| H  | 6.0761840  | -1.8807110 | -1.8523220 |
| H  | 6.4039310  | 1.2764580  | 1.0726420  |
| H  | 7.4454390  | -0.1494800 | -0.6901940 |
| N  | -2.6945320 | -0.0983040 | 0.2989110  |
| N  | -0.6227900 | -2.0035930 | 0.5663550  |
| N  | -0.7081530 | 1.9138180  | -0.2591020 |
| Mn | -0.6939530 | -0.0027070 | 0.2967610  |
| O  | -0.4513160 | 0.2165030  | 1.8507430  |
| C  | 0.1068070  | 2.5972550  | 2.8889140  |
| H  | -0.1950200 | 1.5293480  | 2.4432670  |
| H  | -0.6483220 | 3.2747500  | 2.4662240  |
| H  | -0.0098650 | 2.4300070  | 3.9719910  |
| O  | 1.3594150  | 2.9500860  | 2.4829550  |
| H  | 2.0272240  | 2.6084340  | 3.0996860  |

OSS\_HAT\_Oxo\_G1.log  
69

Final Energy = -2661.6782409500

|   |           |            |            |
|---|-----------|------------|------------|
| C | 3.0922570 | 0.4069740  | -1.2024810 |
| C | 3.3518350 | 0.4648700  | 1.1337360  |
| C | 4.7159520 | 0.6953870  | 1.0071780  |
| C | 5.2727940 | 0.7849940  | -0.2699000 |
| C | 4.4486240 | 0.6446190  | -1.3889280 |
| H | 2.8693270 | 0.3883910  | 2.1072740  |
| H | 5.3241200 | 0.8065380  | 1.9049400  |
| H | 6.3403800 | 0.9723840  | -0.3957160 |
| H | 4.8464770 | 0.7234600  | -2.4007670 |
| C | 2.0992560 | 0.2119890  | -2.3109650 |
| H | 2.0046750 | -0.8556160 | -2.5545530 |
| H | 2.4082040 | 0.7228250  | -3.2339670 |

|    |            |            |            |
|----|------------|------------|------------|
| N  | 0.7900590  | 0.7169940  | -1.8235050 |
| C  | -0.3745670 | 0.1489200  | -2.5541240 |
| H  | -0.4966350 | 0.6344010  | -3.5339350 |
| H  | -0.1885310 | -0.9151330 | -2.7419000 |
| C  | -1.5981460 | 0.3665610  | -1.6963840 |
| H  | -1.7850710 | 1.4394100  | -1.5674990 |
| H  | -2.4938480 | -0.0666390 | -2.1605130 |
| N  | -1.3970660 | -0.2215130 | -0.3287770 |
| C  | 0.7835980  | 2.2113040  | -1.8522740 |
| H  | 0.1195800  | 2.5723070  | -2.6506550 |
| H  | 1.7906160  | 2.5678750  | -2.1129620 |
| C  | 0.4112820  | 2.8132170  | -0.5331400 |
| C  | 0.1839020  | 4.1817830  | -0.3903880 |
| C  | -0.0697700 | 4.6990650  | 0.8771020  |
| H  | 0.2163900  | 4.8254010  | -1.2700030 |
| C  | 0.1325660  | 2.4815020  | 1.7650020  |
| C  | -0.0854120 | 3.8332820  | 1.9749450  |
| H  | -0.2497610 | 5.7671690  | 1.0093120  |
| H  | 0.1152940  | 1.7647210  | 2.5859350  |
| H  | -0.2717650 | 4.1948640  | 2.9862400  |
| C  | -1.6376340 | -1.6944350 | -0.3268520 |
| H  | -2.4847810 | -1.9475540 | -0.9771580 |
| H  | -1.9186780 | -1.9865410 | 0.6950960  |
| C  | -2.3265160 | 0.4456460  | 0.6768290  |
| H  | -2.1059790 | 1.5161670  | 0.6465980  |
| H  | -2.0409660 | 0.0612080  | 1.6631190  |
| C  | -0.4140640 | -2.4760260 | -0.6815500 |
| C  | -0.4716190 | -3.7873320 | -1.1445910 |
| C  | 1.9216570  | -2.5765090 | -0.5336280 |
| C  | 0.7148790  | -4.5031310 | -1.2982310 |
| H  | -1.4391190 | -4.2372590 | -1.3688760 |
| C  | 1.9287480  | -3.8919750 | -0.9701340 |
| H  | 2.8475150  | -2.0691110 | -0.2724850 |
| H  | 0.6930950  | -5.5313800 | -1.6628290 |
| H  | 2.8773950  | -4.4217320 | -1.0548770 |
| C  | -3.7900040 | 0.2058920  | 0.4062960  |
| C  | -4.5086010 | 1.0599450  | -0.4463890 |
| C  | -4.4597030 | -0.8689690 | 1.0130070  |
| C  | -5.8595510 | 0.8264730  | -0.7096840 |
| H  | -4.0161750 | 1.9242110  | -0.8975880 |
| C  | -5.8109530 | -1.1027000 | 0.7509880  |
| H  | -3.9277990 | -1.5215330 | 1.7093060  |
| C  | -6.5112800 | -0.2595610 | -0.1169760 |
| H  | -6.4065140 | 1.4994120  | -1.3732900 |
| H  | -6.3192960 | -1.9409000 | 1.2320750  |
| H  | -7.5685270 | -0.4415440 | -0.3220350 |
| N  | 2.5702900  | 0.3180630  | 0.0457450  |
| N  | 0.3639790  | 1.9862220  | 0.5280330  |
| N  | 0.7707530  | -1.8784360 | -0.4137200 |
| Mn | 0.6024330  | 0.0097170  | 0.2021090  |
| O  | 0.4704730  | -0.2854140 | 1.7354120  |
| C  | 1.0272320  | -2.6039360 | 3.0423210  |
| H  | 0.7693350  | -1.7096860 | 2.3381920  |
| H  | 0.0430830  | -3.0522630 | 3.2461240  |

|   |           |            |           |
|---|-----------|------------|-----------|
| H | 1.6746360 | -3.2627490 | 2.4398040 |
| O | 1.5896010 | -2.1396060 | 4.1989240 |
| H | 2.5452080 | -2.0202810 | 4.0810470 |

69

OSS\_HAT\_Oxo\_G2.log

69

Final Energy = -2661.6861432900

|   |            |            |            |
|---|------------|------------|------------|
| C | -3.3161500 | -0.0766000 | -0.9059820 |
| C | -3.4033560 | -0.1969400 | 1.4403190  |
| C | -4.7911530 | -0.2621910 | 1.4157920  |
| C | -5.4493030 | -0.2293950 | 0.1850220  |
| C | -4.7012950 | -0.1416480 | -0.9916290 |
| H | -2.8396850 | -0.2158390 | 2.3728070  |
| H | -5.3394470 | -0.3390640 | 2.3547530  |
| H | -6.5382820 | -0.2817710 | 0.1385730  |
| H | -5.1804780 | -0.1296710 | -1.9707940 |
| C | -2.3924920 | 0.0376290  | -2.0835630 |
| H | -2.1907350 | 1.0936320  | -2.3094590 |
| H | -2.8257740 | -0.4073560 | -2.9906960 |
| N | -1.1187690 | -0.6284620 | -1.7084880 |
| C | 0.0437810  | -0.1774980 | -2.5208680 |
| H | 0.0364540  | -0.6552310 | -3.5121020 |
| H | -0.0419660 | 0.9033680  | -2.6841470 |
| C | 1.3016190  | -0.5366230 | -1.7663490 |
| H | 1.3866820  | -1.6251570 | -1.6633150 |
| H | 2.1961690  | -0.1893640 | -2.2997240 |
| N | 1.2742170  | 0.0454350  | -0.3812710 |
| C | -1.2945340 | -2.1114270 | -1.7611120 |
| H | -0.7876410 | -2.5242960 | -2.6449640 |
| H | -2.3626190 | -2.3395940 | -1.8907720 |
| C | -0.8388190 | -2.7884050 | -0.5067840 |
| C | -0.7158130 | -4.1746680 | -0.4230960 |
| C | -0.3928120 | -4.7542040 | 0.8012220  |
| H | -0.8833850 | -4.7832320 | -1.3120270 |
| C | -0.3241660 | -2.5589110 | 1.7621610  |
| C | -0.2059960 | -3.9309760 | 1.9157480  |
| H | -0.2928130 | -5.8374120 | 0.8875070  |
| H | -0.1718950 | -1.8730330 | 2.5953930  |
| H | 0.0375540  | -4.3417770 | 2.8955810  |
| C | 1.6650580  | 1.4851050  | -0.3903860 |
| H | 2.4761960  | 1.6623410  | -1.1083630 |
| H | 2.0514120  | 1.7456360  | 0.6060020  |
| C | 2.2085920  | -0.7317490 | 0.5374560  |
| H | 1.9104250  | -1.7820470 | 0.4710560  |
| H | 2.0098100  | -0.3798580 | 1.5561370  |
| C | 0.5042880  | 2.3929780  | -0.6230610 |
| C | 0.6617330  | 3.7077470  | -1.0536150 |
| C | -1.7846900 | 2.7329290  | -0.2611180 |
| C | -0.4480850 | 4.5491800  | -1.0792000 |
| H | 1.6490720  | 4.0613260  | -1.3507360 |
| C | -1.6884090 | 4.0559620  | -0.6607350 |
| H | -2.7329980 | 2.3191190  | 0.0739370  |
| H | -0.3471200 | 5.5831190  | -1.4130460 |
| H | -2.5779070 | 4.6853870  | -0.6444090 |

|    |            |            |            |
|----|------------|------------|------------|
| C  | 3.6693820  | -0.5792910 | 0.1967390  |
| C  | 4.2710770  | -1.3949480 | -0.7755570 |
| C  | 4.4547190  | 0.3756730  | 0.8618470  |
| C  | 5.6209280  | -1.2383650 | -1.0956700 |
| H  | 3.6890450  | -2.1709580 | -1.2766530 |
| C  | 5.8052390  | 0.5317950  | 0.5440190  |
| H  | 4.0144310  | 0.9922110  | 1.6485470  |
| C  | 6.3888710  | -0.2701770 | -0.4411490 |
| H  | 6.0761840  | -1.8807110 | -1.8523220 |
| H  | 6.4039310  | 1.2764580  | 1.0726420  |
| H  | 7.4454390  | -0.1494800 | -0.6901940 |
| N  | -2.6945320 | -0.0983040 | 0.2989110  |
| N  | -0.6227900 | -2.0035930 | 0.5663550  |
| N  | -0.7081530 | 1.9138180  | -0.2591020 |
| Mn | -0.6939530 | -0.0027070 | 0.2967610  |
| O  | -0.4513160 | 0.2165030  | 1.8507430  |
| C  | 0.1068070  | 2.5972550  | 2.8889140  |
| H  | -0.1950200 | 1.5293480  | 2.4432670  |
| H  | -0.6483220 | 3.2747500  | 2.4662240  |
| H  | -0.0098650 | 2.4300070  | 3.9719910  |
| O  | 1.3594150  | 2.9500860  | 2.4829550  |
| H  | 2.0272240  | 2.6084340  | 3.0996860  |

63

OSS\_TS\_MnBnTPEN\_Oxo\_G2.log

63

Final Energy = -2545.9134789800

|   |            |            |            |
|---|------------|------------|------------|
| C | -2.7017230 | -1.2408070 | 0.4814260  |
| C | -1.3623050 | -1.2287850 | 2.4118920  |
| C | -2.3577420 | -1.8626670 | 3.1467200  |
| C | -3.5605800 | -2.1855270 | 2.5156940  |
| C | -3.7322420 | -1.8766360 | 1.1637650  |
| H | -0.4049560 | -0.9482160 | 2.8528870  |
| H | -2.1844070 | -2.0964730 | 4.1972310  |
| H | -4.3585960 | -2.6844590 | 3.0681200  |
| H | -4.6519840 | -2.1313320 | 0.6365310  |
| C | -2.7646760 | -0.8480740 | -0.9732430 |
| H | -3.1327330 | 0.1819410  | -1.0789630 |
| H | -3.4510240 | -1.4958520 | -1.5376270 |
| N | -1.3802260 | -0.9264840 | -1.5036450 |
| C | -1.1279200 | -0.1483420 | -2.7448930 |
| H | -1.4718550 | -0.6969190 | -3.6341040 |
| H | -1.7078910 | 0.7822510  | -2.6978150 |
| C | 0.3623300  | 0.1238750  | -2.8305370 |
| H | 0.9317640  | -0.8130360 | -2.8541180 |
| H | 0.6159780  | 0.6794690  | -3.7444940 |
| N | 0.7961550  | 0.9084550  | -1.6202750 |
| C | -0.9918090 | -2.3583780 | -1.6700280 |
| H | -1.0352600 | -2.6452550 | -2.7303490 |
| H | -1.7299510 | -2.9885800 | -1.1526670 |
| C | 0.3480080  | -2.6545050 | -1.0748800 |
| C | 1.0284530  | -3.8439200 | -1.3299260 |
| C | 2.2161460  | -4.1032900 | -0.6497640 |
| H | 0.6182550  | -4.5545490 | -2.0479300 |
| C | 1.9633920  | -2.0022630 | 0.4777210  |



|    |            |            |            |
|----|------------|------------|------------|
| C  | 2.6829810  | -3.1711550 | 0.2812600  |
| H  | 2.7665910  | -5.0270040 | -0.8361240 |
| H  | 2.2797730  | -1.2477200 | 1.1947230  |
| H  | 3.5967700  | -3.3401050 | 0.8511310  |
| C  | 0.3420100  | 2.3297470  | -1.7776950 |
| H  | 0.1445110  | 2.5379820  | -2.8392720 |
| H  | 1.1596100  | 3.0081200  | -1.5004460 |
| C  | 2.2773140  | 0.8496460  | -1.4649640 |
| H  | 2.7316380  | 1.5105030  | -2.2257040 |
| H  | 2.6070630  | -0.1660270 | -1.7152310 |
| C  | -0.8592750 | 2.6486140  | -0.9442130 |
| C  | -1.4968920 | 3.8847580  | -1.0338960 |
| C  | -2.2713090 | 1.9915170  | 0.7966870  |
| C  | -2.5554080 | 4.1652550  | -0.1742890 |
| H  | -1.1529520 | 4.6158900  | -1.7661840 |
| C  | -2.9401890 | 3.2043800  | 0.7654640  |
| H  | -2.5414830 | 1.2256550  | 1.5193680  |
| H  | -3.0683540 | 5.1269060  | -0.2283360 |
| H  | -3.7501150 | 3.3867580  | 1.4716280  |
| C  | 2.8204980  | 1.2128070  | -0.1090830 |
| C  | 2.0684210  | 1.9566850  | 0.8705710  |
| C  | 4.0765260  | 0.7275260  | 0.2470630  |
| C  | 2.6272040  | 2.2034100  | 2.1631980  |
| H  | 1.2496470  | 2.6083900  | 0.5767890  |
| C  | 4.5942890  | 0.9693310  | 1.5226980  |
| H  | 4.6511660  | 0.1310560  | -0.4636630 |
| C  | 3.8664170  | 1.7023550  | 2.4888530  |
| H  | 2.0486320  | 2.7928820  | 2.8755270  |
| H  | 5.5751880  | 0.5661560  | 1.7824910  |
| H  | 4.2968410  | 1.8757840  | 3.4758940  |
| N  | -1.5439530 | -0.9236170 | 1.1142590  |
| N  | 0.8303190  | -1.7420950 | -0.2084490 |
| N  | -1.2617900 | 1.7109220  | -0.0589000 |
| Mn | -0.1839460 | 0.0131780  | -0.0136050 |
| O  | 0.8214670  | 0.4515900  | 1.1870370  |

63

OSS\_TS\_MnBnTPEN\_Oxo\_G3.log

63

Final Energy = -2545.9115383500

|   |            |            |            |
|---|------------|------------|------------|
| C | -3.0517100 | 0.1167250  | 0.3956680  |
| C | -1.9336540 | -0.4338210 | 2.3808470  |
| C | -3.1378680 | -0.5252360 | 3.0726450  |
| C | -4.3295150 | -0.2841180 | 2.3867060  |
| C | -4.2875080 | 0.0373690  | 1.0271790  |
| H | -0.9708450 | -0.6061090 | 2.8653220  |
| H | -3.1327190 | -0.7826380 | 4.1319020  |
| H | -5.2883930 | -0.3512570 | 2.9034500  |
| H | -5.1996720 | 0.2233620  | 0.4597020  |
| C | -2.8538790 | 0.4921290  | -1.0496050 |
| H | -2.7004970 | 1.5762440  | -1.1431800 |
| H | -3.7244080 | 0.2317460  | -1.6680190 |
| N | -1.6263960 | -0.2065830 | -1.5275960 |
| C | -1.0098550 | 0.3989590  | -2.7441240 |
| H | -1.5524250 | 0.0892470  | -3.6488650 |

|    |            |            |            |
|----|------------|------------|------------|
| H  | -1.0967460 | 1.4904270  | -2.6716310 |
| C  | 0.4392820  | -0.0434160 | -2.8020520 |
| H  | 0.5100170  | -1.1361410 | -2.8810460 |
| H  | 0.9468170  | 0.3783260  | -3.6815470 |
| N  | 1.1434580  | 0.3737790  | -1.5448900 |
| C  | -1.9323770 | -1.6620200 | -1.7341980 |
| H  | -2.0064790 | -1.8770210 | -2.8093910 |
| H  | -2.9242460 | -1.8736920 | -1.3096100 |
| C  | -0.9469040 | -2.5656170 | -1.0600540 |
| C  | -0.9203380 | -3.9395600 | -1.2932850 |
| C  | -0.0519370 | -4.7346180 | -0.5480970 |
| H  | -1.5822330 | -4.3729060 | -2.0437170 |
| C  | 0.6897100  | -2.7590790 | 0.5896630  |
| C  | 0.7571510  | -4.1345790 | 0.4204870  |
| H  | -0.0131180 | -5.8124900 | -0.7140530 |
| H  | 1.2964610  | -2.2544650 | 1.3399120  |
| H  | 1.4373840  | -4.7190710 | 1.0398370  |
| C  | 1.4925660  | 1.8244910  | -1.5911520 |
| H  | 1.6417530  | 2.1503540  | -2.6305920 |
| H  | 2.4601260  | 1.9681870  | -1.0871340 |
| C  | 2.3804170  | -0.4344300 | -1.3600610 |
| H  | 3.0577410  | -0.2596030 | -2.2096230 |
| H  | 2.0974410  | -1.4958880 | -1.3964640 |
| C  | 0.4867840  | 2.6799060  | -0.8837390 |
| C  | 0.4701150  | 4.0654530  | -1.0325220 |
| C  | -1.1584460 | 2.7838870  | 0.7659100  |
| C  | -0.3957630 | 4.8199250  | -0.2440410 |
| H  | 1.1391560  | 4.5393090  | -1.7513590 |
| C  | -1.2115810 | 4.1671940  | 0.6841340  |
| H  | -1.7848470 | 2.2437520  | 1.4721300  |
| H  | -0.4273730 | 5.9060870  | -0.3449340 |
| H  | -1.8891140 | 4.7178760  | 1.3365640  |
| C  | 3.1223640  | -0.1637670 | -0.0758480 |
| C  | 2.4750950  | -0.0074110 | 1.1935380  |
| C  | 4.5117100  | -0.1358100 | -0.0784150 |
| C  | 3.2225850  | 0.0200460  | 2.4052880  |
| H  | 1.9275570  | 1.0742380  | 1.4104450  |
| C  | 5.2507910  | -0.0321910 | 1.1116870  |
| H  | 5.0389540  | -0.2146330 | -1.0308370 |
| C  | 4.6111850  | 0.0413060  | 2.3499720  |
| H  | 2.6762110  | 0.0784690  | 3.3477160  |
| H  | 6.3407840  | -0.0186250 | 1.0608680  |
| H  | 5.1881330  | 0.1036370  | 3.2733770  |
| N  | -1.9041640 | -0.1173400 | 1.0764050  |
| N  | -0.1336360 | -1.9904010 | -0.1526750 |
| N  | -0.3396050 | 2.0501770  | -0.0196540 |
| Mn | -0.2398530 | 0.0212370  | -0.0352250 |
| O  | 1.0528490  | 0.0193270  | 1.3401370  |

69

Singlet\_HAT\_Oxo\_G1.log

69

Final Energy = -2661.6771244100

|   |           |           |            |
|---|-----------|-----------|------------|
| C | 3.1914190 | 0.3007750 | -1.0967160 |
| C | 3.3767850 | 0.4616020 | 1.2356500  |

|   |            |            |            |
|---|------------|------------|------------|
| C | 4.7517490  | 0.6418240  | 1.1441670  |
| C | 5.3544580  | 0.6458040  | -0.1149440 |
| C | 4.5609220  | 0.4818500  | -1.2517910 |
| H | 2.8633300  | 0.4557800  | 2.1963200  |
| H | 5.3328300  | 0.7804730  | 2.0560620  |
| H | 6.4317600  | 0.7890400  | -0.2128440 |
| H | 4.9896630  | 0.5022560  | -2.2539280 |
| C | 2.2194450  | 0.1144430  | -2.2217340 |
| H | 2.0923500  | -0.9541450 | -2.4444230 |
| H | 2.5618020  | 0.5985170  | -3.1477360 |
| N | 0.9215700  | 0.6730530  | -1.7658410 |
| C | -0.2306630 | 0.1551680  | -2.5496070 |
| H | -0.2956170 | 0.6537300  | -3.5282950 |
| H | -0.0749640 | -0.9133070 | -2.7421750 |
| C | -1.4726050 | 0.4008460  | -1.7328410 |
| H | -1.6273890 | 1.4760440  | -1.5825440 |
| H | -2.3689440 | 0.0094250  | -2.2312980 |
| N | -1.3204040 | -0.2308040 | -0.3813160 |
| C | 0.9785380  | 2.1669730  | -1.7913420 |
| H | 0.3968830  | 2.5519910  | -2.6410920 |
| H | 2.0177280  | 2.4782440  | -1.9713600 |
| C | 0.5335950  | 2.7952140  | -0.5049160 |
| C | 0.3183530  | 4.1702380  | -0.4035850 |
| C | 0.0078140  | 4.7182320  | 0.8381540  |
| H | 0.4050050  | 4.7956990  | -1.2926340 |
| C | 0.1335280  | 2.5155210  | 1.7755400  |
| C | -0.0740110 | 3.8755620  | 1.9501960  |
| H | -0.1637050 | 5.7911880  | 0.9392120  |
| H | 0.0644930  | 1.8165950  | 2.6092770  |
| H | -0.3043680 | 4.2607070  | 2.9436140  |
| C | -1.5754740 | -1.7007900 | -0.4412490 |
| H | -2.3567670 | -1.9288030 | -1.1779300 |
| H | -1.9638890 | -2.0157820 | 0.5376680  |
| C | -2.2831720 | 0.4147380  | 0.6083780  |
| H | -2.0182520 | 1.4741770  | 0.6579520  |
| H | -2.0747680 | -0.0393560 | 1.5838460  |
| C | -0.3323070 | -2.4937380 | -0.6926090 |
| C | -0.3677300 | -3.7974780 | -1.1805690 |
| C | 1.9740420  | -2.6326450 | -0.3363800 |
| C | 0.8168270  | -4.5308060 | -1.2351590 |
| H | -1.3165940 | -4.2286390 | -1.5010240 |
| C | 2.0040850  | -3.9429150 | -0.7893300 |
| H | 2.8793460  | -2.1415640 | 0.0142570  |
| H | 0.8131340  | -5.5538280 | -1.6149090 |
| H | 2.9489300  | -4.4861130 | -0.7962670 |
| C | -3.7363350 | 0.2577140  | 0.2377640  |
| C | -4.3735370 | 1.2180510  | -0.5651730 |
| C | -4.4796740 | -0.8405290 | 0.7000020  |
| C | -5.7150640 | 1.0691320  | -0.9212770 |
| H | -3.8227010 | 2.0978530  | -0.9049750 |
| C | -5.8216240 | -0.9903240 | 0.3450340  |
| H | -4.0145980 | -1.5791470 | 1.3567490  |
| C | -6.4398310 | -0.0392580 | -0.4723400 |
| H | -6.1974940 | 1.8248660  | -1.5446220 |

|    |            |            |            |
|----|------------|------------|------------|
| H  | -6.3875440 | -1.8480060 | 0.7146120  |
| H  | -7.4898560 | -0.1555560 | -0.7495960 |
| N  | 2.6246160  | 0.2819910  | 0.1316180  |
| N  | 0.4191060  | 1.9888050  | 0.5657840  |
| N  | 0.8277320  | -1.9175530 | -0.3034680 |
| Mn | 0.6457850  | -0.0078200 | 0.2618200  |
| O  | 0.4862300  | -0.2674660 | 1.8151410  |
| C  | 0.6378460  | -2.4792660 | 3.1357830  |
| H  | 0.6214740  | -1.4677040 | 2.3848250  |
| H  | 0.2933660  | -3.2767530 | 2.4594320  |
| H  | 1.7100970  | -2.4870120 | 3.3802850  |
| O  | -0.1228090 | -2.2219330 | 4.2056270  |
| H  | -1.0493710 | -2.4742630 | 4.0498190  |

69

Singlet\_HAT\_Oxo\_G2.log

69

Final Energy = -2661.6807260300

|   |            |            |            |
|---|------------|------------|------------|
| C | -3.1555460 | -0.3942470 | -1.0777590 |
| C | -3.3645550 | -0.5391620 | 1.2534100  |
| C | -4.7354840 | -0.7412570 | 1.1481710  |
| C | -5.3234700 | -0.7681900 | -0.1176130 |
| C | -4.5199570 | -0.6003580 | -1.2467220 |
| H | -2.8622030 | -0.5164860 | 2.2194230  |
| H | -5.3248080 | -0.8794010 | 2.0548130  |
| H | -6.3970270 | -0.9304200 | -0.2263670 |
| H | -4.9373850 | -0.6344440 | -2.2531990 |
| C | -2.1763800 | -0.1880230 | -2.1925930 |
| H | -2.0677120 | 0.8837800  | -2.4096020 |
| H | -2.5005110 | -0.6747220 | -3.1237140 |
| N | -0.8717000 | -0.7221530 | -1.7265860 |
| C | 0.2765380  | -0.1741730 | -2.4965910 |
| H | 0.3594900  | -0.6641640 | -3.4782250 |
| H | 0.1009920  | 0.8925280  | -2.6819090 |
| C | 1.5154380  | -0.4018570 | -1.6703330 |
| H | 1.6878130  | -1.4750660 | -1.5250410 |
| H | 2.4094210  | 0.0088300  | -2.1575910 |
| N | 1.3385570  | 0.2178550  | -0.3166750 |
| C | -0.8950190 | -2.2168450 | -1.7641530 |
| H | -0.2798470 | -2.5814930 | -2.5991470 |
| H | -1.9207460 | -2.5501240 | -1.9780250 |
| C | -0.4705810 | -2.8458310 | -0.4712580 |
| C | -0.2481630 | -4.2200010 | -0.3715460 |
| C | 0.0490220  | -4.7704140 | 0.8722250  |
| H | -0.3186150 | -4.8429170 | -1.2638350 |
| C | -0.1030520 | -2.5717460 | 1.8148510  |
| C | 0.1114580  | -3.9307520 | 1.9878230  |
| H | 0.2254030  | -5.8426820 | 0.9722000  |
| H | -0.0507450 | -1.8756350 | 2.6520540  |
| H | 0.3312030  | -4.3175480 | 2.9830060  |
| C | 1.5694840  | 1.6925570  | -0.3639890 |
| H | 2.3463030  | 1.9391480  | -1.0995730 |
| H | 1.9550210  | 2.0066870  | 0.6158480  |
| C | 2.3007300  | -0.4213850 | 0.6779580  |
| H | 2.0495340  | -1.4846580 | 0.7167670  |

|    |            |            |            |
|----|------------|------------|------------|
| H  | 2.0765090  | 0.0209930  | 1.6552280  |
| C  | 0.3154810  | 2.4705580  | -0.6064930 |
| C  | 0.3400020  | 3.7900500  | -1.0503630 |
| C  | -1.9952940 | 2.5638200  | -0.2874280 |
| C  | -0.8532520 | 4.5084580  | -1.0998080 |
| H  | 1.2881770  | 4.2449820  | -1.3381970 |
| C  | -2.0384150 | 3.8878400  | -0.6963750 |
| H  | -2.8990830 | 2.0494910  | 0.0323890  |
| H  | -0.8580690 | 5.5444060  | -1.4427590 |
| H  | -2.9916710 | 4.4161220  | -0.7020860 |
| C  | 3.7556220  | -0.2427750 | 0.3246680  |
| C  | 4.4165990  | -1.1939970 | -0.4698590 |
| C  | 4.4778790  | 0.8647200  | 0.7983000  |
| C  | 5.7615240  | -1.0281340 | -0.8051570 |
| H  | 3.8819530  | -2.0802350 | -0.8189920 |
| C  | 5.8230530  | 1.0315310  | 0.4639120  |
| H  | 3.9935470  | 1.5969170  | 1.4482360  |
| C  | 6.4655970  | 0.0885760  | -0.3440810 |
| H  | 6.2628440  | -1.7773640 | -1.4214070 |
| H  | 6.3724750  | 1.8959090  | 0.8426680  |
| H  | 7.5184160  | 0.2177670  | -0.6045210 |
| N  | -2.6021700 | -0.3594460 | 0.1562160  |
| N  | -0.3764030 | -2.0422380 | 0.6032690  |
| N  | -0.8394620 | 1.8652880  | -0.2561240 |
| Mn | -0.6286290 | -0.0472490 | 0.3055450  |
| O  | -0.4805830 | 0.1993630  | 1.8658540  |
| C  | -0.8900340 | 2.4626540  | 3.0437870  |
| H  | -0.6480200 | 1.3732840  | 2.4427810  |
| H  | -1.9828730 | 2.4843260  | 2.9291640  |
| H  | -0.5133830 | 2.1839670  | 4.0411910  |
| O  | -0.2944660 | 3.4929420  | 2.4319760  |
| H  | 0.6126040  | 3.6261370  | 2.7585520  |

63

Singlet\_TS\_MnBnTPEN\_Oxo\_G2.log

63

|                |            |                  |            |
|----------------|------------|------------------|------------|
| Final Energy = |            | -2545.9037860800 |            |
| C              | -2.7964330 | -1.0020440       | 0.4672670  |
| C              | -1.4822190 | -1.1356410       | 2.4035270  |
| C              | -2.5313170 | -1.7066260       | 3.1170190  |
| C              | -3.7484300 | -1.9247030       | 2.4693450  |
| C              | -3.8811200 | -1.5736250       | 1.1235520  |
| H              | -0.5104730 | -0.9414310       | 2.8595580  |
| H              | -2.3867160 | -1.9756160       | 4.1635490  |
| H              | -4.5872200 | -2.3740710       | 3.0035780  |
| H              | -4.8115640 | -1.7463120       | 0.5817320  |
| C              | -2.8111520 | -0.5716790       | -0.9770940 |
| H              | -3.0741970 | 0.4916640        | -1.0622580 |
| H              | -3.5535900 | -1.1359690       | -1.5603000 |
| N              | -1.4370700 | -0.7735870       | -1.5107730 |
| C              | -1.1253860 | -0.0040910       | -2.7428670 |
| H              | -1.5215590 | -0.5079690       | -3.6370430 |
| H              | -1.6200440 | 0.9738720        | -2.6817920 |
| C              | 0.3818190  | 0.1310180        | -2.8277240 |
| H              | 0.8575260  | -0.8569520       | -2.8536150 |

|    |            |            |            |
|----|------------|------------|------------|
| H  | 0.6862900  | 0.6614680  | -3.7411200 |
| N  | 0.8835330  | 0.8607270  | -1.6132230 |
| C  | -1.1952740 | -2.2336120 | -1.7057370 |
| H  | -1.2311770 | -2.4851850 | -2.7753100 |
| H  | -2.0125320 | -2.7954020 | -1.2312530 |
| C  | 0.0870680  | -2.6829340 | -1.0834770 |
| C  | 0.6347530  | -3.9386990 | -1.3466350 |
| C  | 1.7810970  | -4.3337030 | -0.6622200 |
| H  | 0.1552350  | -4.5922630 | -2.0760820 |
| C  | 1.7463970  | -2.2253080 | 0.4793430  |
| C  | 2.3397220  | -3.4628020 | 0.2767860  |
| H  | 2.2294980  | -5.3102400 | -0.8525260 |
| H  | 2.1427510  | -1.5185360 | 1.2057090  |
| H  | 3.2278180  | -3.7310090 | 0.8493540  |
| C  | 0.5704420  | 2.3174570  | -1.7535310 |
| H  | 0.4083130  | 2.5650970  | -2.8124600 |
| H  | 1.4431990  | 2.9115360  | -1.4500600 |
| C  | 2.3476020  | 0.6588230  | -1.4610390 |
| H  | 2.8728170  | 1.2549070  | -2.2304800 |
| H  | 2.5771950  | -0.3905990 | -1.6875060 |
| C  | -0.6056630 | 2.7306360  | -0.9256510 |
| C  | -1.1445500 | 4.0127650  | -1.0140360 |
| C  | -2.0620250 | 2.1853980  | 0.8183590  |
| C  | -2.1743510 | 4.3758770  | -0.1499170 |
| H  | -0.7473160 | 4.7144380  | -1.7481610 |
| C  | -2.6297830 | 3.4487140  | 0.7926380  |
| H  | -2.3924870 | 1.4410200  | 1.5390310  |
| H  | -2.6109040 | 5.3746160  | -0.2028070 |
| H  | -3.4191540 | 3.6961170  | 1.5022800  |
| C  | 2.9244110  | 0.9873410  | -0.1116260 |
| C  | 2.1598220  | 1.6681750  | 0.9207150  |
| C  | 4.1859640  | 0.5050750  | 0.2066300  |
| C  | 2.7461580  | 1.8650000  | 2.2237210  |
| H  | 1.4265910  | 2.4248220  | 0.6436460  |
| C  | 4.7147320  | 0.6923240  | 1.4905320  |
| H  | 4.7630030  | -0.0471530 | -0.5371650 |
| C  | 3.9944030  | 1.3688860  | 2.5041740  |
| H  | 2.1687790  | 2.4125360  | 2.9699970  |
| H  | 5.7036800  | 0.2886370  | 1.7175460  |
| H  | 4.4411610  | 1.5017510  | 3.4900560  |
| N  | -1.6245240 | -0.7896480 | 1.1130840  |
| N  | 0.6494840  | -1.8363140 | -0.2032950 |
| N  | -1.0798070 | 1.8242250  | -0.0405770 |
| Mn | -0.1759400 | 0.0463560  | 0.0016620  |
| O  | 0.9340180  | 0.3284230  | 1.1454390  |

63

Singlet\_TS\_MnBnTPEN\_Oxo\_G3.log

63

|                |                  |           |
|----------------|------------------|-----------|
| Final Energy = | -2545.8778248300 |           |
| C              | -2.8197300       | 0.3281040 |
| C              | -2.0599080       | 2.3249650 |
| C              | -3.2543600       | 2.9678970 |
| C              | -4.2542980       | 2.2511330 |
| C              | -4.0380770       | 0.9097250 |

|   |            |            |            |
|---|------------|------------|------------|
| H | -1.2439930 | -0.3838840 | 2.8346060  |
| H | -3.3920270 | 0.1639790  | 4.0129080  |
| H | -5.2019490 | 1.3549450  | 2.7298990  |
| H | -4.8028050 | 1.9329620  | 0.3175290  |
| C | -2.4359430 | 1.4096540  | -1.0940370 |
| H | -1.8867650 | 2.3604250  | -1.1422520 |
| H | -3.3157910 | 1.5098770  | -1.7453490 |
| N | -1.5423780 | 0.3134920  | -1.5831710 |
| C | -0.7503610 | 0.6756280  | -2.7891400 |
| H | -1.3546490 | 0.5718490  | -3.7016600 |
| H | -0.4560110 | 1.7305440  | -2.7144440 |
| C | 0.4517560  | -0.2416850 | -2.8166320 |
| H | 0.1382790  | -1.2934800 | -2.8598540 |
| H | 1.0839250  | -0.0560450 | -3.6973300 |
| N | 1.2407690  | -0.0423410 | -1.5594340 |
| C | -2.3579420 | -0.9223020 | -1.8202740 |
| H | -2.3668090 | -1.1594940 | -2.8930230 |
| H | -3.4029030 | -0.7182580 | -1.5471770 |
| C | -1.8760490 | -2.0917230 | -1.0215800 |
| C | -2.4239110 | -3.3637530 | -1.1879500 |
| C | -1.9800110 | -4.4019270 | -0.3736730 |
| H | -3.1927130 | -3.5249540 | -1.9446010 |
| C | -0.5002990 | -2.8450710 | 0.6940450  |
| C | -1.0046260 | -4.1339050 | 0.5901890  |
| H | -2.3928560 | -5.4060030 | -0.4848110 |
| H | 0.2555280  | -2.5947750 | 1.4369150  |
| H | -0.6327900 | -4.9108810 | 1.2582880  |
| C | 2.0278020  | 1.2246500  | -1.6468520 |
| H | 2.1650070  | 1.5200480  | -2.6968640 |
| H | 3.0386570  | 1.0506730  | -1.2504450 |
| C | 2.1550310  | -1.1998460 | -1.3561620 |
| H | 2.8111590  | -1.3075050 | -2.2331930 |
| H | 1.5376210  | -2.1093180 | -1.3023390 |
| C | 1.4132810  | 2.3315810  | -0.8511700 |
| C | 1.8678060  | 3.6449780  | -0.9480960 |
| C | -0.0550000 | 2.9139670  | 0.8690400  |
| C | 1.3343850  | 4.6107900  | -0.0973990 |
| H | 2.6388230  | 3.8956960  | -1.6772670 |
| C | 0.3660680  | 4.2336010  | 0.8381070  |
| H | -0.8132560 | 2.5864160  | 1.5771650  |
| H | 1.6757900  | 5.6456330  | -0.1567270 |
| H | -0.0665220 | 4.9520800  | 1.5341790  |
| C | 2.9969770  | -1.0998600 | -0.1133420 |
| C | 2.4148290  | -0.8031680 | 1.1536460  |
| C | 4.3565780  | -1.3808870 | -0.1286540 |
| C | 3.1428810  | -0.9104240 | 2.3653650  |
| H | 1.9721160  | 0.3406070  | 1.3320930  |
| C | 5.1061860  | -1.4116150 | 1.0601240  |
| H | 4.8449980  | -1.5954410 | -1.0807520 |
| C | 4.5056580  | -1.1792010 | 2.3001400  |
| H | 2.6265130  | -0.7337920 | 3.3098660  |
| H | 6.1734140  | -1.6337280 | 1.0088610  |
| H | 5.0924850  | -1.2235110 | 3.2183430  |
| N | -1.8587080 | 0.4628690  | 1.0399770  |

|    |            |            |            |
|----|------------|------------|------------|
| N  | -0.9212080 | -1.8441970 | -0.1073240 |
| N  | 0.4461980  | 1.9794460  | 0.0255290  |
| Mn | -0.2003410 | 0.0750710  | -0.0247470 |
| O  | 0.9938740  | -0.5623150 | 1.2527450  |

63

Singlet\_TS\_MnBnTPEN\_Oxo\_G4.log

63

Final Energy = -2545.9037860400

|   |            |            |            |
|---|------------|------------|------------|
| C | -2.7969030 | -1.0008770 | 0.4672040  |
| C | -1.4828280 | -1.1347350 | 2.4035350  |
| C | -2.5321890 | -1.7051870 | 3.1170650  |
| C | -3.7493630 | -1.9228620 | 2.4693710  |
| C | -3.8818520 | -1.5719240 | 1.1235230  |
| H | -0.5110140 | -0.9408660 | 2.8595640  |
| H | -2.3877400 | -1.9740860 | 4.1636390  |
| H | -4.5883570 | -2.3718100 | 3.0036350  |
| H | -4.8123420 | -1.7443040 | 0.5816880  |
| C | -2.8114110 | -0.5707080 | -0.9772170 |
| H | -3.0740780 | 0.4927160  | -1.0625460 |
| H | -3.5540440 | -1.1348230 | -1.5603520 |
| N | -1.4373940 | -0.7731740 | -1.5108400 |
| C | -1.1253690 | -0.0038620 | -2.7429630 |
| H | -1.5218350 | -0.5075420 | -3.6371210 |
| H | -1.6195010 | 0.9743700  | -2.6818950 |
| C | 0.3819010  | 0.1304590  | -2.8278200 |
| H | 0.8570920  | -0.8577630 | -2.8535500 |
| H | 0.6866730  | 0.6606420  | -3.7412710 |
| N | 0.8839120  | 0.8600570  | -1.6133840 |
| C | -1.1961330 | -2.2332990 | -1.7057380 |
| H | -1.2319170 | -2.4848550 | -2.7753210 |
| H | -2.0136990 | -2.7947710 | -1.2314130 |
| C | 0.0859270  | -2.6831250 | -1.0832520 |
| C | 0.6330600  | -3.9391770 | -1.3461970 |
| C | 1.7791550  | -4.3346240 | -0.6616230 |
| H | 0.1533230  | -4.5926160 | -2.0756120 |
| C | 1.7453050  | -2.2260770 | 0.4796790  |
| C | 2.3380910  | -3.4638620 | 0.2773270  |
| H | 2.2271230  | -5.3113920 | -0.8517610 |
| H | 2.1418810  | -1.5194060 | 1.2060200  |
| H | 3.2260050  | -3.7324040 | 0.8500200  |
| C | 0.5715440  | 2.3169290  | -1.7538710 |
| H | 0.4091790  | 2.5644350  | -2.8127940 |
| H | 1.4447350  | 2.9105720  | -1.4508060 |
| C | 2.3478670  | 0.6574820  | -1.4610800 |
| H | 2.8734210  | 1.2532110  | -2.2305620 |
| H | 2.5769890  | -0.3920790 | -1.6873660 |
| C | -0.6041260 | 2.7309040  | -0.9257690 |
| C | -1.1419750 | 4.0134830  | -1.0139320 |
| C | -2.0610120 | 2.1864590  | 0.8180420  |
| C | -2.1715810 | 4.3772130  | -0.1498390 |
| H | -0.7440750 | 4.7149870  | -1.7478650 |
| C | -2.6278320 | 3.4501990  | 0.7924730  |
| H | -2.3920210 | 1.4422280  | 1.5386170  |
| H | -2.6073510 | 5.3763030  | -0.2025520 |



|    |            |            |            |
|----|------------|------------|------------|
| H  | -3.4170890 | 3.6980700  | 1.5020790  |
| C  | 2.9246920  | 0.9859650  | -0.1116680 |
| C  | 2.1602700  | 1.6673200  | 0.9204740  |
| C  | 4.1859920  | 0.5032110  | 0.2068210  |
| C  | 2.7465800  | 1.8641840  | 2.2235010  |
| H  | 1.4274210  | 2.4241980  | 0.6431980  |
| C  | 4.7147080  | 0.6904930  | 1.4907440  |
| H  | 4.7628760  | -0.0494200 | -0.5367960 |
| C  | 3.9945800  | 1.3675910  | 2.5041750  |
| H  | 2.1693710  | 2.4121390  | 2.9696000  |
| H  | 5.7034520  | 0.2864090  | 1.7179430  |
| H  | 4.4413070  | 1.5004760  | 3.4900690  |
| N  | -1.6249340 | -0.7888700 | 1.1130360  |
| N  | 0.6486330  | -1.8366610 | -0.2031100 |
| N  | -1.0789960 | 1.8246970  | -0.0408800 |
| Mn | -0.1759910 | 0.0464090  | 0.0015620  |
| O  | 0.9341060  | 0.3281730  | 1.1453650  |

63

TS<sub>SRN1</sub>

63

Final Energy = -2545.9391103200

|   |            |            |            |
|---|------------|------------|------------|
| C | -2.6552380 | -1.3917240 | 0.4522270  |
| C | -1.3311660 | -1.2710890 | 2.3987830  |
| C | -2.2927200 | -1.9541250 | 3.1332940  |
| C | -3.4680660 | -2.3572360 | 2.4954400  |
| C | -3.6505030 | -2.0767630 | 1.1380190  |
| H | -0.3959270 | -0.9178250 | 2.8353100  |
| H | -2.1165590 | -2.1619040 | 4.1886820  |
| H | -4.2392580 | -2.8957170 | 3.0489270  |
| H | -4.5517710 | -2.3911980 | 0.6111320  |
| C | -2.7295140 | -1.0113870 | -1.0048690 |
| H | -3.1667560 | -0.0088100 | -1.1158920 |
| H | -3.3647840 | -1.7067450 | -1.5722660 |
| N | -1.3395500 | -0.9940370 | -1.5240290 |
| C | -1.1270760 | -0.1858440 | -2.7540590 |
| H | -1.4333670 | -0.7437580 | -3.6511360 |
| H | -1.7625530 | 0.7074110  | -2.6977280 |
| C | 0.3443160  | 0.1753050  | -2.8326140 |
| H | 0.9695530  | -0.7245770 | -2.8777850 |
| H | 0.5640240  | 0.7623030  | -3.7356460 |
| N | 0.7464460  | 0.9611880  | -1.6098480 |
| C | -0.8447760 | -2.3938350 | -1.6910940 |
| H | -0.8698230 | -2.6852300 | -2.7507590 |
| H | -1.5341280 | -3.0754240 | -1.1707380 |
| C | 0.5137770  | -2.5960860 | -1.0937270 |
| C | 1.2878860  | -3.7237130 | -1.3561000 |
| C | 2.4812110  | -3.9025800 | -0.6574330 |
| H | 0.9463590  | -4.4536950 | -2.0906330 |
| C | 2.0565750  | -1.8497330 | 0.5055070  |
| C | 2.8630000  | -2.9584190 | 0.3004870  |
| H | 3.1024630  | -4.7789360 | -0.8502510 |
| H | 2.2898000  | -1.0818850 | 1.2398140  |
| H | 3.7770260  | -3.0721770 | 0.8833250  |
| C | 0.2256580  | 2.3655100  | -1.7348600 |

|    |            |            |            |
|----|------------|------------|------------|
| H  | 0.0439410  | 2.5946530  | -2.7951790 |
| H  | 1.0057120  | 3.0695390  | -1.4172240 |
| C  | 2.2347370  | 0.9747330  | -1.4763150 |
| H  | 2.6375710  | 1.6790000  | -2.2254040 |
| H  | 2.6083590  | -0.0157470 | -1.7635450 |
| C  | -1.0048420 | 2.6093540  | -0.9183420 |
| C  | -1.7070540 | 3.8105920  | -1.0068250 |
| C  | -2.3922910 | 1.8695980  | 0.8086960  |
| C  | -2.7857290 | 4.0297290  | -0.1546440 |
| H  | -1.3953240 | 4.5633080  | -1.7315100 |
| C  | -3.1255500 | 3.0451800  | 0.7773070  |
| H  | -2.6252430 | 1.0873240  | 1.5262630  |
| H  | -3.3489190 | 4.9628330  | -0.2079910 |
| H  | -3.9495920 | 3.1794670  | 1.4779200  |
| C  | 2.7734480  | 1.3137770  | -0.1090940 |
| C  | 1.9756440  | 1.9559280  | 0.9140590  |
| C  | 4.0603460  | 0.9017780  | 0.2071870  |
| C  | 2.5578810  | 2.2005320  | 2.2067630  |
| H  | 1.1757560  | 2.6389140  | 0.6349460  |
| C  | 4.5936230  | 1.1304130  | 1.4845790  |
| H  | 4.6603750  | 0.3764760  | -0.5382100 |
| C  | 3.8354300  | 1.7790830  | 2.4875370  |
| H  | 1.9548870  | 2.7211580  | 2.9518160  |
| H  | 5.6056280  | 0.7883210  | 1.7091070  |
| H  | 4.2739700  | 1.9545450  | 3.4708960  |
| N  | -1.5239270 | -1.0007920 | 1.0948080  |
| N  | 0.9219390  | -1.6668820 | -0.2027350 |
| N  | -1.3657780 | 1.6488420  | -0.0415280 |
| Mn | -0.2019790 | -0.0144860 | -0.0226740 |
| O  | 0.7475130  | 0.5523040  | 1.2555590  |

63

OSS\_TS\_MnBnTPEN\_Oxo\_G1.log

63

|                |            |                  |            |
|----------------|------------|------------------|------------|
| Final Energy = |            | -2545.9053440100 |            |
| C              | -2.2682760 | 1.9154570        | 0.2355650  |
| C              | -1.7804520 | 0.9294400        | 2.3103840  |
| C              | -2.7530890 | 1.6953540        | 2.9428990  |
| C              | -3.4975870 | 2.5997070        | 2.1834730  |
| C              | -3.2559390 | 2.7067250        | 0.8113970  |
| H              | -1.1619980 | 0.2127970        | 2.8522050  |
| H              | -2.9178370 | 1.5784010        | 4.0141210  |
| H              | -4.2688930 | 3.2127420        | 2.6527120  |
| H              | -3.8308020 | 3.3912350        | 0.1871870  |
| C              | -1.9111750 | 1.9455480        | -1.2304260 |
| H              | -1.0877200 | 2.6498430        | -1.4107250 |
| H              | -2.7608850 | 2.2743280        | -1.8466360 |
| N              | -1.4666290 | 0.5783360        | -1.5949300 |
| C              | -0.6494900 | 0.4665900        | -2.8322980 |
| H              | -1.2879290 | 0.4466760        | -3.7272480 |
| H              | -0.0119040 | 1.3558980        | -2.9154720 |
| C              | 0.1749170  | -0.8053170       | -2.7291700 |
| H              | -0.4624280 | -1.6898150       | -2.6046250 |
| H              | 0.7769010  | -0.9663620       | -3.6354400 |
| N              | 1.0707810  | -0.6916410       | -1.5297550 |

|    |            |            |            |
|----|------------|------------|------------|
| C  | -2.6494020 | -0.3264830 | -1.6743570 |
| H  | -2.9123490 | -0.5233700 | -2.7230500 |
| H  | -3.5180330 | 0.1848340  | -1.2333200 |
| C  | -2.4545540 | -1.5880060 | -0.9002670 |
| C  | -3.3274720 | -2.6688800 | -1.0191690 |
| C  | -3.2183250 | -3.7296380 | -0.1238760 |
| H  | -4.0957170 | -2.6558700 | -1.7932600 |
| C  | -1.4117810 | -2.5637000 | 0.9350690  |
| C  | -2.2614100 | -3.6585200 | 0.8921900  |
| H  | -3.8893940 | -4.5869640 | -0.1984700 |
| H  | -0.6853140 | -2.4481940 | 1.7348750  |
| H  | -2.1689130 | -4.4377270 | 1.6487650  |
| C  | 2.1395280  | 0.3169390  | -1.8385620 |
| H  | 2.1756340  | 0.5043520  | -2.9205290 |
| H  | 3.1206020  | -0.0924050 | -1.5796890 |
| C  | 1.6942040  | -2.0344020 | -1.1979000 |
| H  | 2.2809070  | -2.3628590 | -2.0684870 |
| H  | 0.8696400  | -2.7425380 | -1.0492990 |
| C  | 1.9782150  | 1.5948730  | -1.0847030 |
| C  | 2.8649650  | 2.6564520  | -1.2660430 |
| C  | 0.8633670  | 2.7493840  | 0.6094230  |
| C  | 2.7294080  | 3.7932620  | -0.4762480 |
| H  | 3.6559370  | 2.5739690  | -2.0122770 |
| C  | 1.7174070  | 3.8325150  | 0.4887570  |
| H  | 0.0740110  | 2.7467360  | 1.3561340  |
| H  | 3.4121580  | 4.6354720  | -0.6005000 |
| H  | 1.5869180  | 4.6919490  | 1.1462600  |
| C  | 2.5591160  | -1.9322760 | 0.0215710  |
| C  | 3.9206390  | -1.6758600 | -0.0450850 |
| C  | 1.9320870  | -2.0018330 | 1.3129830  |
| C  | 4.6497550  | -1.4133480 | 1.1288300  |
| H  | 4.4391390  | -1.6728050 | -1.0055880 |
| C  | 2.6923960  | -1.7245940 | 2.4955430  |
| H  | 1.1067770  | -2.7066490 | 1.4119620  |
| C  | 4.0315980  | -1.4130020 | 2.3959090  |
| H  | 5.7161940  | -1.1921150 | 1.0513100  |
| H  | 2.1938570  | -1.7826180 | 3.4644740  |
| H  | 4.6205210  | -1.1972730 | 3.2882390  |
| N  | -1.5480520 | 1.0491070  | 0.9915090  |
| N  | -1.4721400 | -1.5711840 | 0.0222380  |
| N  | 0.9779350  | 1.6588100  | -0.1843820 |
| Mn | -0.1536770 | 0.0004990  | -0.0039120 |
| O  | 0.6109610  | -0.5720580 | 1.3257600  |

63

OSS\_TS\_MnBnTPEN\_Oxo\_G2.log

63

Final Energy = -2545.9134789800

|   |            |            |           |
|---|------------|------------|-----------|
| C | -2.7017230 | -1.2408070 | 0.4814260 |
| C | -1.3623050 | -1.2287850 | 2.4118920 |
| C | -2.3577420 | -1.8626670 | 3.1467200 |
| C | -3.5605800 | -2.1855270 | 2.5156940 |
| C | -3.7322420 | -1.8766360 | 1.1637650 |
| H | -0.4049560 | -0.9482160 | 2.8528870 |
| H | -2.1844070 | -2.0964730 | 4.1972310 |

|   |            |            |            |
|---|------------|------------|------------|
| H | -4.3585960 | -2.6844590 | 3.0681200  |
| H | -4.6519840 | -2.1313320 | 0.6365310  |
| C | -2.7646760 | -0.8480740 | -0.9732430 |
| H | -3.1327330 | 0.1819410  | -1.0789630 |
| H | -3.4510240 | -1.4958520 | -1.5376270 |
| N | -1.3802260 | -0.9264840 | -1.5036450 |
| C | -1.1279200 | -0.1483420 | -2.7448930 |
| H | -1.4718550 | -0.6969190 | -3.6341040 |
| H | -1.7078910 | 0.7822510  | -2.6978150 |
| C | 0.3623300  | 0.1238750  | -2.8305370 |
| H | 0.9317640  | -0.8130360 | -2.8541180 |
| H | 0.6159780  | 0.6794690  | -3.7444940 |
| N | 0.7961550  | 0.9084550  | -1.6202750 |
| C | -0.9918090 | -2.3583780 | -1.6700280 |
| H | -1.0352600 | -2.6452550 | -2.7303490 |
| H | -1.7299510 | -2.9885800 | -1.1526670 |
| C | 0.3480080  | -2.6545050 | -1.0748800 |
| C | 1.0284530  | -3.8439200 | -1.3299260 |
| C | 2.2161460  | -4.1032900 | -0.6497640 |
| H | 0.6182550  | -4.5545490 | -2.0479300 |
| C | 1.9633920  | -2.0022630 | 0.4777210  |
| C | 2.6829810  | -3.1711550 | 0.2812600  |
| H | 2.7665910  | -5.0270040 | -0.8361240 |
| H | 2.2797730  | -1.2477200 | 1.1947230  |
| H | 3.5967700  | -3.3401050 | 0.8511310  |
| C | 0.3420100  | 2.3297470  | -1.7776950 |
| H | 0.1445110  | 2.5379820  | -2.8392720 |
| H | 1.1596100  | 3.0081200  | -1.5004460 |
| C | 2.2773140  | 0.8496460  | -1.4649640 |
| H | 2.7316380  | 1.5105030  | -2.2257040 |
| H | 2.6070630  | -0.1660270 | -1.7152310 |
| C | -0.8592750 | 2.6486140  | -0.9442130 |
| C | -1.4968920 | 3.8847580  | -1.0338960 |
| C | -2.2713090 | 1.9915170  | 0.7966870  |
| C | -2.5554080 | 4.1652550  | -0.1742890 |
| H | -1.1529520 | 4.6158900  | -1.7661840 |
| C | -2.9401890 | 3.2043800  | 0.7654640  |
| H | -2.5414830 | 1.2256550  | 1.5193680  |
| H | -3.0683540 | 5.1269060  | -0.2283360 |
| H | -3.7501150 | 3.3867580  | 1.4716280  |
| C | 2.8204980  | 1.2128070  | -0.1090830 |
| C | 2.0684210  | 1.9566850  | 0.8705710  |
| C | 4.0765260  | 0.7275260  | 0.2470630  |
| C | 2.6272040  | 2.2034100  | 2.1631980  |
| H | 1.2496470  | 2.6083900  | 0.5767890  |
| C | 4.5942890  | 0.9693310  | 1.5226980  |
| H | 4.6511660  | 0.1310560  | -0.4636630 |
| C | 3.8664170  | 1.7023550  | 2.4888530  |
| H | 2.0486320  | 2.7928820  | 2.8755270  |
| H | 5.5751880  | 0.5661560  | 1.7824910  |
| H | 4.2968410  | 1.8757840  | 3.4758940  |
| N | -1.5439530 | -0.9236170 | 1.1142590  |
| N | 0.8303190  | -1.7420950 | -0.2084490 |
| N | -1.2617900 | 1.7109220  | -0.0589000 |

|    |            |           |            |
|----|------------|-----------|------------|
| Mn | -0.1839460 | 0.0131780 | -0.0136050 |
| O  | 0.8214670  | 0.4515900 | 1.1870370  |

63

Quintet\_TS\_HAT\_MnBnTPEN\_Oxo\_G1.log

63

Final Energy = -2545.9061093900

|   |            |            |            |
|---|------------|------------|------------|
| C | -3.2059100 | 0.1889370  | 0.1954660  |
| C | -2.2879510 | -0.3555660 | 2.2999580  |
| C | -3.5539900 | -0.4174300 | 2.8688900  |
| C | -4.6686160 | -0.1645570 | 2.0662640  |
| C | -4.4934560 | 0.1389330  | 0.7124530  |
| H | -1.3732570 | -0.5321200 | 2.8676530  |
| H | -3.6555090 | -0.6611670 | 3.9264010  |
| H | -5.6737770 | -0.2101070 | 2.4887230  |
| H | -5.3449230 | 0.3297770  | 0.0589550  |
| C | -2.8649580 | 0.5292560  | -1.2295010 |
| H | -2.6969120 | 1.6103490  | -1.3324040 |
| H | -3.6763130 | 0.2616260  | -1.9214490 |
| N | -1.6079950 | -0.1879400 | -1.5679070 |
| C | -0.8497230 | 0.4043250  | -2.7004080 |
| H | -1.3009030 | 0.1221030  | -3.6636000 |
| H | -0.9070830 | 1.4969300  | -2.6271420 |
| C | 0.5738810  | -0.0986980 | -2.6210440 |
| H | 0.6067030  | -1.1904750 | -2.7292680 |
| H | 1.1841850  | 0.3214920  | -3.4325260 |
| N | 1.2149780  | 0.2422580  | -1.2954000 |
| C | -1.8964650 | -1.6406110 | -1.7894980 |
| H | -1.8577080 | -1.8749490 | -2.8630050 |
| H | -2.9284940 | -1.8462550 | -1.4695000 |
| C | -0.9933850 | -2.5393490 | -1.0024690 |
| C | -0.9357440 | -3.9132790 | -1.2245950 |
| C | -0.1618000 | -4.7043620 | -0.3776300 |
| H | -1.5030470 | -4.3500190 | -2.0468880 |
| C | 0.4445880  | -2.7310150 | 0.8423030  |
| C | 0.5289340  | -4.1045210 | 0.6801660  |
| H | -0.1044550 | -5.7826470 | -0.5355110 |
| H | 0.9582960  | -2.2077900 | 1.6472700  |
| H | 1.1319100  | -4.6898900 | 1.3741550  |
| C | 1.6404220  | 1.6753860  | -1.2800020 |
| H | 1.9993750  | 1.9723310  | -2.2758520 |
| H | 2.4959370  | 1.7731990  | -0.5958370 |
| C | 2.4116090  | -0.6611270 | -1.1583010 |
| H | 2.9469560  | -0.6413690 | -2.1189050 |
| H | 2.0355620  | -1.6854710 | -1.0329340 |
| C | 0.5728980  | 2.5924990  | -0.7789780 |
| C | 0.6328280  | 3.9689710  | -0.9887290 |
| C | -1.2807230 | 2.8384930  | 0.6246550  |
| C | -0.2986380 | 4.7921890  | -0.3603830 |
| H | 1.4143510  | 4.3807440  | -1.6277860 |
| C | -1.2605190 | 4.2170290  | 0.4740630  |
| H | -2.0197070 | 2.3592960  | 1.2630420  |
| H | -0.2679480 | 5.8725190  | -0.5105740 |
| H | -1.9968190 | 4.8226080  | 1.0022670  |
| C | 3.3870000  | -0.3292930 | -0.0618420 |

|    |            |            |            |
|----|------------|------------|------------|
| C  | 3.0195840  | 0.1014810  | 1.2186690  |
| C  | 4.7570330  | -0.5549760 | -0.2558140 |
| C  | 3.9036820  | 0.5325320  | 2.2020520  |
| H  | 1.7991790  | -0.0334000 | 1.5342300  |
| C  | 5.6774430  | -0.2520130 | 0.7562570  |
| H  | 5.1065790  | -0.9532770 | -1.2111140 |
| C  | 5.2612600  | 0.2834910  | 1.9839630  |
| H  | 3.5487310  | 0.9834440  | 3.1307210  |
| H  | 6.7428540  | -0.3945300 | 0.5646010  |
| H  | 5.9901440  | 0.5257400  | 2.7598610  |
| N  | -2.1365230 | -0.0557130 | 0.9969950  |
| N  | -0.2883920 | -1.9700690 | -0.0012320 |
| N  | -0.3951960 | 2.0439770  | -0.0127200 |
| Mn | -0.3529430 | 0.0216450  | 0.1231280  |
| O  | 0.5382340  | 0.0490320  | 1.6105340  |

63

Singlet\_TS\_HAT\_MnBnTPEN\_Oxo\_G1.log

63

Final Energy = -2545.9085541600

|   |            |            |            |
|---|------------|------------|------------|
| C | 3.0669470  | 0.1881540  | -0.3123920 |
| C | 2.0701710  | -0.6342440 | -2.2762820 |
| C | 3.3133680  | -0.8084350 | -2.8707620 |
| C | 4.4624750  | -0.4697050 | -2.1547210 |
| C | 4.3361980  | 0.0297190  | -0.8573640 |
| H | 1.1500510  | -0.8832100 | -2.8035450 |
| H | 3.3662930  | -1.2076100 | -3.8837610 |
| H | 5.4506280  | -0.6010170 | -2.5984380 |
| H | 5.2104730  | 0.2934880  | -0.2617560 |
| C | 2.8031460  | 0.7492650  | 1.0530200  |
| H | 2.6708900  | 1.8386730  | 0.9957710  |
| H | 3.6451380  | 0.5683720  | 1.7354600  |
| N | 1.5525800  | 0.1342580  | 1.5596050  |
| C | 0.8730310  | 0.9375500  | 2.6076360  |
| H | 1.3734280  | 0.8197990  | 3.5811570  |
| H | 0.9338270  | 1.9992450  | 2.3451550  |
| C | -0.5486270 | 0.4393430  | 2.6817430  |
| H | -0.5757880 | -0.6090850 | 3.0047360  |
| H | -1.1394790 | 1.0161510  | 3.4064490  |
| N | -1.2131430 | 0.5083820  | 1.3333800  |
| C | 1.8287850  | -1.2454720 | 2.0593740  |
| H | 1.6111330  | -1.3098860 | 3.1344850  |
| H | 2.9030960  | -1.4576270 | 1.9620850  |
| C | 1.0803530  | -2.2934290 | 1.3033270  |
| C | 1.2074300  | -3.6462910 | 1.6239690  |
| C | 0.6061280  | -4.5992750 | 0.8095760  |
| H | 1.7964000  | -3.9336430 | 2.4955960  |
| C | -0.1961130 | -2.8169670 | -0.5779170 |
| C | -0.0892240 | -4.1741830 | -0.3263460 |
| H | 0.6962830  | -5.6613220 | 1.0429380  |
| H | -0.7206650 | -2.4502480 | -1.4572440 |
| H | -0.5501820 | -4.8811740 | -1.0162940 |
| C | -1.6591900 | 1.8999700  | 1.0402620  |
| H | -2.1045570 | 2.3576470  | 1.9339560  |
| H | -2.4414770 | 1.8475190  | 0.2710980  |

|    |            |            |            |
|----|------------|------------|------------|
| C  | -2.4195210 | -0.4360390 | 1.3923440  |
| H  | -2.9662510 | -0.1336820 | 2.2992610  |
| H  | -2.0115800 | -1.4365270 | 1.5697450  |
| C  | -0.5708790 | 2.7347950  | 0.4613230  |
| C  | -0.5744590 | 4.1246800  | 0.5179850  |
| C  | 1.2680740  | 2.7441190  | -0.9897100 |
| C  | 0.3818990  | 4.8321880  | -0.2083870 |
| H  | -1.3294490 | 4.6350600  | 1.1158720  |
| C  | 1.3033350  | 4.1289730  | -0.9903970 |
| H  | 1.9712460  | 2.1695700  | -1.5861520 |
| H  | 0.4017920  | 5.9226990  | -0.1750820 |
| H  | 2.0502950  | 4.6417260  | -1.5960460 |
| C  | -3.3489240 | -0.4327360 | 0.2157540  |
| C  | -3.3056360 | -1.4874330 | -0.7175100 |
| C  | -4.3342240 | 0.5623440  | 0.0570160  |
| C  | -4.1592300 | -1.5080080 | -1.8210330 |
| H  | -2.6272810 | -2.3214360 | -0.5497590 |
| C  | -5.1869610 | 0.5436890  | -1.0443590 |
| H  | -4.4532710 | 1.3448700  | 0.8087160  |
| C  | -5.0902890 | -0.4828890 | -1.9957400 |
| H  | -4.1052590 | -2.3334810 | -2.5330260 |
| H  | -5.9416730 | 1.3241480  | -1.1574880 |
| H  | -5.7618900 | -0.4927950 | -2.8566280 |
| N  | 1.9623210  | -0.1373540 | -1.0266730 |
| N  | 0.3464090  | -1.8927580 | 0.2507570  |
| N  | 0.3628070  | 2.0624400  | -0.2517100 |
| Mn | 0.1703970  | 0.0880050  | -0.1648350 |
| O  | -0.8184100 | -0.1586530 | -1.2807940 |

63

Singlet\_TS\_MnBnTPEN\_Oxo\_G2.log

63

Final Energy = -2545.9037860800

|   |            |            |            |
|---|------------|------------|------------|
| C | -2.7964330 | -1.0020440 | 0.4672670  |
| C | -1.4822190 | -1.1356410 | 2.4035270  |
| C | -2.5313170 | -1.7066260 | 3.1170190  |
| C | -3.7484300 | -1.9247030 | 2.4693450  |
| C | -3.8811200 | -1.5736250 | 1.1235520  |
| H | -0.5104730 | -0.9414310 | 2.8595580  |
| H | -2.3867160 | -1.9756160 | 4.1635490  |
| H | -4.5872200 | -2.3740710 | 3.0035780  |
| H | -4.8115640 | -1.7463120 | 0.5817320  |
| C | -2.8111520 | -0.5716790 | -0.9770940 |
| H | -3.0741970 | 0.4916640  | -1.0622580 |
| H | -3.5535900 | -1.1359690 | -1.5603000 |
| N | -1.4370700 | -0.7735870 | -1.5107730 |
| C | -1.1253860 | -0.0040910 | -2.7428670 |
| H | -1.5215590 | -0.5079690 | -3.6370430 |
| H | -1.6200440 | 0.9738720  | -2.6817920 |
| C | 0.3818190  | 0.1310180  | -2.8277240 |
| H | 0.8575260  | -0.8569520 | -2.8536150 |
| H | 0.6862900  | 0.6614680  | -3.7411200 |
| N | 0.8835330  | 0.8607270  | -1.6132230 |
| C | -1.1952740 | -2.2336120 | -1.7057370 |
| H | -1.2311770 | -2.4851850 | -2.7753100 |

|    |            |            |            |
|----|------------|------------|------------|
| H  | -2.0125320 | -2.7954020 | -1.2312530 |
| C  | 0.0870680  | -2.6829340 | -1.0834770 |
| C  | 0.6347530  | -3.9386990 | -1.3466350 |
| C  | 1.7810970  | -4.3337030 | -0.6622200 |
| H  | 0.1552350  | -4.5922630 | -2.0760820 |
| C  | 1.7463970  | -2.2253080 | 0.4793430  |
| C  | 2.3397220  | -3.4628020 | 0.2767860  |
| H  | 2.2294980  | -5.3102400 | -0.8525260 |
| H  | 2.1427510  | -1.5185360 | 1.2057090  |
| H  | 3.2278180  | -3.7310090 | 0.8493540  |
| C  | 0.5704420  | 2.3174570  | -1.7535310 |
| H  | 0.4083130  | 2.5650970  | -2.8124600 |
| H  | 1.4431990  | 2.9115360  | -1.4500600 |
| C  | 2.3476020  | 0.6588230  | -1.4610390 |
| H  | 2.8728170  | 1.2549070  | -2.2304800 |
| H  | 2.5771950  | -0.3905990 | -1.6875060 |
| C  | -0.6056630 | 2.7306360  | -0.9256510 |
| C  | -1.1445500 | 4.0127650  | -1.0140360 |
| C  | -2.0620250 | 2.1853980  | 0.8183590  |
| C  | -2.1743510 | 4.3758770  | -0.1499170 |
| H  | -0.7473160 | 4.7144380  | -1.7481610 |
| C  | -2.6297830 | 3.4487140  | 0.7926380  |
| H  | -2.3924870 | 1.4410200  | 1.5390310  |
| H  | -2.6109040 | 5.3746160  | -0.2028070 |
| H  | -3.4191540 | 3.6961170  | 1.5022800  |
| C  | 2.9244110  | 0.9873410  | -0.1116260 |
| C  | 2.1598220  | 1.6681750  | 0.9207150  |
| C  | 4.1859640  | 0.5050750  | 0.2066300  |
| C  | 2.7461580  | 1.8650000  | 2.2237210  |
| H  | 1.4265910  | 2.4248220  | 0.6436460  |
| C  | 4.7147320  | 0.6923240  | 1.4905320  |
| H  | 4.7630030  | -0.0471530 | -0.5371650 |
| C  | 3.9944030  | 1.3688860  | 2.5041740  |
| H  | 2.1687790  | 2.4125360  | 2.9699970  |
| H  | 5.7036800  | 0.2886370  | 1.7175460  |
| H  | 4.4411610  | 1.5017510  | 3.4900560  |
| N  | -1.6245240 | -0.7896480 | 1.1130840  |
| N  | 0.6494840  | -1.8363140 | -0.2032950 |
| N  | -1.0798070 | 1.8242250  | -0.0405770 |
| Mn | -0.1759400 | 0.0463560  | 0.0016620  |
| O  | 0.9340180  | 0.3284230  | 1.1454390  |

63

Singlet\_TS\_MnBnTPEN\_Oxo\_G3.log

63

Final Energy = -2545.8778248300

|   |            |            |           |
|---|------------|------------|-----------|
| C | -2.8197300 | 1.0964470  | 0.3281040 |
| C | -2.0599080 | 0.1317130  | 2.3249650 |
| C | -3.2543600 | 0.4422030  | 2.9678970 |
| C | -4.2542980 | 1.1026470  | 2.2511330 |
| C | -4.0380770 | 1.4295410  | 0.9097250 |
| H | -1.2439930 | -0.3838840 | 2.8346060 |
| H | -3.3920270 | 0.1639790  | 4.0129080 |
| H | -5.2019490 | 1.3549450  | 2.7298990 |
| H | -4.8028050 | 1.9329620  | 0.3175290 |



|    |            |            |            |
|----|------------|------------|------------|
| C  | -2.4359430 | 1.4096540  | -1.0940370 |
| H  | -1.8867650 | 2.3604250  | -1.1422520 |
| H  | -3.3157910 | 1.5098770  | -1.7453490 |
| N  | -1.5423780 | 0.3134920  | -1.5831710 |
| C  | -0.7503610 | 0.6756280  | -2.7891400 |
| H  | -1.3546490 | 0.5718490  | -3.7016600 |
| H  | -0.4560110 | 1.7305440  | -2.7144440 |
| C  | 0.4517560  | -0.2416850 | -2.8166320 |
| H  | 0.1382790  | -1.2934800 | -2.8598540 |
| H  | 1.0839250  | -0.0560450 | -3.6973300 |
| N  | 1.2407690  | -0.0423410 | -1.5594340 |
| C  | -2.3579420 | -0.9223020 | -1.8202740 |
| H  | -2.3668090 | -1.1594940 | -2.8930230 |
| H  | -3.4029030 | -0.7182580 | -1.5471770 |
| C  | -1.8760490 | -2.0917230 | -1.0215800 |
| C  | -2.4239110 | -3.3637530 | -1.1879500 |
| C  | -1.9800110 | -4.4019270 | -0.3736730 |
| H  | -3.1927130 | -3.5249540 | -1.9446010 |
| C  | -0.5002990 | -2.8450710 | 0.6940450  |
| C  | -1.0046260 | -4.1339050 | 0.5901890  |
| H  | -2.3928560 | -5.4060030 | -0.4848110 |
| H  | 0.2555280  | -2.5947750 | 1.4369150  |
| H  | -0.6327900 | -4.9108810 | 1.2582880  |
| C  | 2.0278020  | 1.2246500  | -1.6468520 |
| H  | 2.1650070  | 1.5200480  | -2.6968640 |
| H  | 3.0386570  | 1.0506730  | -1.2504450 |
| C  | 2.1550310  | -1.1998460 | -1.3561620 |
| H  | 2.8111590  | -1.3075050 | -2.2331930 |
| H  | 1.5376210  | -2.1093180 | -1.3023390 |
| C  | 1.4132810  | 2.3315810  | -0.8511700 |
| C  | 1.8678060  | 3.6449780  | -0.9480960 |
| C  | -0.0550000 | 2.9139670  | 0.8690400  |
| C  | 1.3343850  | 4.6107900  | -0.0973990 |
| H  | 2.6388230  | 3.8956960  | -1.6772670 |
| C  | 0.3660680  | 4.2336010  | 0.8381070  |
| H  | -0.8132560 | 2.5864160  | 1.5771650  |
| H  | 1.6757900  | 5.6456330  | -0.1567270 |
| H  | -0.0665220 | 4.9520800  | 1.5341790  |
| C  | 2.9969770  | -1.0998600 | -0.1133420 |
| C  | 2.4148290  | -0.8031680 | 1.1536460  |
| C  | 4.3565780  | -1.3808870 | -0.1286540 |
| C  | 3.1428810  | -0.9104240 | 2.3653650  |
| H  | 1.9721160  | 0.3406070  | 1.3320930  |
| C  | 5.1061860  | -1.4116150 | 1.0601240  |
| H  | 4.8449980  | -1.5954410 | -1.0807520 |
| C  | 4.5056580  | -1.1792010 | 2.3001400  |
| H  | 2.6265130  | -0.7337920 | 3.3098660  |
| H  | 6.1734140  | -1.6337280 | 1.0088610  |
| H  | 5.0924850  | -1.2235110 | 3.2183430  |
| N  | -1.8587080 | 0.4628690  | 1.0399770  |
| N  | -0.9212080 | -1.8441970 | -0.1073240 |
| N  | 0.4461980  | 1.9794460  | 0.0255290  |
| Mn | -0.2003410 | 0.0750710  | -0.0247470 |
| O  | 0.9938740  | -0.5623150 | 1.2527450  |

63

Singlet\_TS\_MnBnTPEN\_Oxo\_G4.log

63

|                |                  |            |            |
|----------------|------------------|------------|------------|
| Final Energy = | -2545.9037860400 |            |            |
| C              | -2.7969030       | -1.0008770 | 0.4672040  |
| C              | -1.4828280       | -1.1347350 | 2.4035350  |
| C              | -2.5321890       | -1.7051870 | 3.1170650  |
| C              | -3.7493630       | -1.9228620 | 2.4693710  |
| C              | -3.8818520       | -1.5719240 | 1.1235230  |
| H              | -0.5110140       | -0.9408660 | 2.8595640  |
| H              | -2.3877400       | -1.9740860 | 4.1636390  |
| H              | -4.5883570       | -2.3718100 | 3.0036350  |
| H              | -4.8123420       | -1.7443040 | 0.5816880  |
| C              | -2.8114110       | -0.5707080 | -0.9772170 |
| H              | -3.0740780       | 0.4927160  | -1.0625460 |
| H              | -3.5540440       | -1.1348230 | -1.5603520 |
| N              | -1.4373940       | -0.7731740 | -1.5108400 |
| C              | -1.1253690       | -0.0038620 | -2.7429630 |
| H              | -1.5218350       | -0.5075420 | -3.6371210 |
| H              | -1.6195010       | 0.9743700  | -2.6818950 |
| C              | 0.3819010        | 0.1304590  | -2.8278200 |
| H              | 0.8570920        | -0.8577630 | -2.8535500 |
| H              | 0.6866730        | 0.6606420  | -3.7412710 |
| N              | 0.8839120        | 0.8600570  | -1.6133840 |
| C              | -1.1961330       | -2.2332990 | -1.7057380 |
| H              | -1.2319170       | -2.4848550 | -2.7753210 |
| H              | -2.0136990       | -2.7947710 | -1.2314130 |
| C              | 0.0859270        | -2.6831250 | -1.0832520 |
| C              | 0.6330600        | -3.9391770 | -1.3461970 |
| C              | 1.7791550        | -4.3346240 | -0.6616230 |
| H              | 0.1533230        | -4.5926160 | -2.0756120 |
| C              | 1.7453050        | -2.2260770 | 0.4796790  |
| C              | 2.3380910        | -3.4638620 | 0.2773270  |
| H              | 2.2271230        | -5.3113920 | -0.8517610 |
| H              | 2.1418810        | -1.5194060 | 1.2060200  |
| H              | 3.2260050        | -3.7324040 | 0.8500200  |
| C              | 0.5715440        | 2.3169290  | -1.7538710 |
| H              | 0.4091790        | 2.5644350  | -2.8127940 |
| H              | 1.4447350        | 2.9105720  | -1.4508060 |
| C              | 2.3478670        | 0.6574820  | -1.4610800 |
| H              | 2.8734210        | 1.2532110  | -2.2305620 |
| H              | 2.5769890        | -0.3920790 | -1.6873660 |
| C              | -0.6041260       | 2.7309040  | -0.9257690 |
| C              | -1.1419750       | 4.0134830  | -1.0139320 |
| C              | -2.0610120       | 2.1864590  | 0.8180420  |
| C              | -2.1715810       | 4.3772130  | -0.1498390 |
| H              | -0.7440750       | 4.7149870  | -1.7478650 |
| C              | -2.6278320       | 3.4501990  | 0.7924730  |
| H              | -2.3920210       | 1.4422280  | 1.5386170  |
| H              | -2.6073510       | 5.3763030  | -0.2025520 |
| H              | -3.4170890       | 3.6980700  | 1.5020790  |
| C              | 2.9246920        | 0.9859650  | -0.1116680 |
| C              | 2.1602700        | 1.6673200  | 0.9204740  |
| C              | 4.1859920        | 0.5032110  | 0.2068210  |

|    |            |            |            |
|----|------------|------------|------------|
| C  | 2.7465800  | 1.8641840  | 2.2235010  |
| H  | 1.4274210  | 2.4241980  | 0.6431980  |
| C  | 4.7147080  | 0.6904930  | 1.4907440  |
| H  | 4.7628760  | -0.0494200 | -0.5367960 |
| C  | 3.9945800  | 1.3675910  | 2.5041750  |
| H  | 2.1693710  | 2.4121390  | 2.9696000  |
| H  | 5.7034520  | 0.2864090  | 1.7179430  |
| H  | 4.4413070  | 1.5004760  | 3.4900690  |
| N  | -1.6249340 | -0.7888700 | 1.1130360  |
| N  | 0.6486330  | -1.8366610 | -0.2031100 |
| N  | -1.0789960 | 1.8246970  | -0.0408800 |
| Mn | -0.1759910 | 0.0464090  | 0.0015620  |
| O  | 0.9341060  | 0.3281730  | 1.1453650  |

63

TS<sub>HAT</sub>

63

Final Energy = -2545.9136245100

|   |            |            |            |
|---|------------|------------|------------|
| C | -3.2086010 | 0.0454930  | 0.2235780  |
| C | -2.2476720 | -0.4560550 | 2.3180400  |
| C | -3.5037270 | -0.5628630 | 2.9014360  |
| C | -4.6365380 | -0.3576550 | 2.1107560  |
| C | -4.4875660 | -0.0543540 | 0.7541440  |
| H | -1.3247500 | -0.5970640 | 2.8822590  |
| H | -3.5830820 | -0.8044930 | 3.9613270  |
| H | -5.6343010 | -0.4392060 | 2.5450960  |
| H | -5.3520860 | 0.1006480  | 0.1082520  |
| C | -2.9019910 | 0.4042600  | -1.2034250 |
| H | -2.7920050 | 1.4927610  | -1.3069420 |
| H | -3.7046730 | 0.0932810  | -1.8872100 |
| N | -1.6133770 | -0.2476100 | -1.5538960 |
| C | -0.8967210 | 0.3833570  | -2.6960170 |
| H | -1.3454590 | 0.0746810  | -3.6519060 |
| H | -1.0088610 | 1.4715240  | -2.6237350 |
| C | 0.5510580  | -0.0457640 | -2.6339720 |
| H | 0.6400280  | -1.1330870 | -2.7509370 |
| H | 1.1322030  | 0.4131030  | -3.4458000 |
| N | 1.1835410  | 0.3181440  | -1.3113120 |
| C | -1.8333170 | -1.7131960 | -1.7779600 |
| H | -1.8326560 | -1.9334660 | -2.8546170 |
| H | -2.8356920 | -1.9767150 | -1.4097290 |
| C | -0.8475130 | -2.5641460 | -1.0404730 |
| C | -0.6893240 | -3.9230570 | -1.2995320 |
| C | 0.1531500  | -4.6741920 | -0.4812710 |
| H | -1.2326410 | -4.3817830 | -2.1260440 |
| C | 0.6265670  | -2.6929160 | 0.7838410  |
| C | 0.8086370  | -4.0521090 | 0.5861130  |
| H | 0.2900750  | -5.7404980 | -0.6685360 |
| H | 1.1145330  | -2.1551950 | 1.5951540  |
| H | 1.4618110  | -4.6077590 | 1.2587540  |
| C | 1.5483650  | 1.7686470  | -1.2821320 |
| H | 1.8923120  | 2.0882990  | -2.2760700 |
| H | 2.3992460  | 1.8918510  | -0.5965890 |
| C | 2.4240400  | -0.5296280 | -1.1721710 |
| H | 2.9749620  | -0.4465720 | -2.1204420 |

|    |            |            |            |
|----|------------|------------|------------|
| H  | 2.0942410  | -1.5729250 | -1.0949000 |
| C  | 0.4407050  | 2.6319520  | -0.7732180 |
| C  | 0.4298400  | 4.0105460  | -0.9736280 |
| C  | -1.4187350 | 2.7751080  | 0.6413410  |
| C  | -0.5406460 | 4.7808250  | -0.3370680 |
| H  | 1.1870200  | 4.4658060  | -1.6123000 |
| C  | -1.4683230 | 4.1531590  | 0.4985910  |
| H  | -2.1273140 | 2.2563680  | 1.2828650  |
| H  | -0.5663300 | 5.8620900  | -0.4814090 |
| H  | -2.2310280 | 4.7178080  | 1.0345560  |
| C  | 3.3622930  | -0.1799710 | -0.0458260 |
| C  | 2.9829350  | 0.0636400  | 1.2674410  |
| C  | 4.7485500  | -0.1345930 | -0.2892330 |
| C  | 3.8277450  | 0.3136160  | 2.3300020  |
| H  | 1.7492410  | 0.1344560  | 1.5198310  |
| C  | 5.6524510  | 0.1121200  | 0.7459830  |
| H  | 5.1094440  | -0.2983430 | -1.3079220 |
| C  | 5.2037990  | 0.3362230  | 2.0496870  |
| H  | 3.4499500  | 0.4903170  | 3.3384110  |
| H  | 6.7220690  | 0.1333250  | 0.5287790  |
| H  | 5.9114260  | 0.5338240  | 2.8577720  |
| N  | -2.1197290 | -0.1548870 | 1.0118120  |
| N  | -0.1710850 | -1.9690590 | -0.0332790 |
| N  | -0.4977080 | 2.0308230  | -0.0081480 |
| Mn | -0.3474730 | 0.0136360  | 0.1080160  |
| O  | 0.5226130  | 0.0816880  | 1.5794030  |

63

Triplet\_TS\_MnBnTPEN\_Oxo\_G2.log

63

Final Energy = -2545.9391103200

|   |            |            |            |
|---|------------|------------|------------|
| C | -2.6552380 | -1.3917240 | 0.4522270  |
| C | -1.3311660 | -1.2710890 | 2.3987830  |
| C | -2.2927200 | -1.9541250 | 3.1332940  |
| C | -3.4680660 | -2.3572360 | 2.4954400  |
| C | -3.6505030 | -2.0767630 | 1.1380190  |
| H | -0.3959270 | -0.9178250 | 2.8353100  |
| H | -2.1165590 | -2.1619040 | 4.1886820  |
| H | -4.2392580 | -2.8957170 | 3.0489270  |
| H | -4.5517710 | -2.3911980 | 0.6111320  |
| C | -2.7295140 | -1.0113870 | -1.0048690 |
| H | -3.1667560 | -0.0088100 | -1.1158920 |
| H | -3.3647840 | -1.7067450 | -1.5722660 |
| N | -1.3395500 | -0.9940370 | -1.5240290 |
| C | -1.1270760 | -0.1858440 | -2.7540590 |
| H | -1.4333670 | -0.7437580 | -3.6511360 |
| H | -1.7625530 | 0.7074110  | -2.6977280 |
| C | 0.3443160  | 0.1753050  | -2.8326140 |
| H | 0.9695530  | -0.7245770 | -2.8777850 |
| H | 0.5640240  | 0.7623030  | -3.7356460 |
| N | 0.7464460  | 0.9611880  | -1.6098480 |
| C | -0.8447760 | -2.3938350 | -1.6910940 |
| H | -0.8698230 | -2.6852300 | -2.7507590 |
| H | -1.5341280 | -3.0754240 | -1.1707380 |
| C | 0.5137770  | -2.5960860 | -1.0937270 |

|    |            |            |            |
|----|------------|------------|------------|
| C  | 1.2878860  | -3.7237130 | -1.3561000 |
| C  | 2.4812110  | -3.9025800 | -0.6574330 |
| H  | 0.9463590  | -4.4536950 | -2.0906330 |
| C  | 2.0565750  | -1.8497330 | 0.5055070  |
| C  | 2.8630000  | -2.9584190 | 0.3004870  |
| H  | 3.1024630  | -4.7789360 | -0.8502510 |
| H  | 2.2898000  | -1.0818850 | 1.2398140  |
| H  | 3.7770260  | -3.0721770 | 0.8833250  |
| C  | 0.2256580  | 2.3655100  | -1.7348600 |
| H  | 0.0439410  | 2.5946530  | -2.7951790 |
| H  | 1.0057120  | 3.0695390  | -1.4172240 |
| C  | 2.2347370  | 0.9747330  | -1.4763150 |
| H  | 2.6375710  | 1.6790000  | -2.2254040 |
| H  | 2.6083590  | -0.0157470 | -1.7635450 |
| C  | -1.0048420 | 2.6093540  | -0.9183420 |
| C  | -1.7070540 | 3.8105920  | -1.0068250 |
| C  | -2.3922910 | 1.8695980  | 0.8086960  |
| C  | -2.7857290 | 4.0297290  | -0.1546440 |
| H  | -1.3953240 | 4.5633080  | -1.7315100 |
| C  | -3.1255500 | 3.0451800  | 0.7773070  |
| H  | -2.6252430 | 1.0873240  | 1.5262630  |
| H  | -3.3489190 | 4.9628330  | -0.2079910 |
| H  | -3.9495920 | 3.1794670  | 1.4779200  |
| C  | 2.7734480  | 1.3137770  | -0.1090940 |
| C  | 1.9756440  | 1.9559280  | 0.9140590  |
| C  | 4.0603460  | 0.9017780  | 0.2071870  |
| C  | 2.5578810  | 2.2005320  | 2.2067630  |
| H  | 1.1757560  | 2.6389140  | 0.6349460  |
| C  | 4.5936230  | 1.1304130  | 1.4845790  |
| H  | 4.6603750  | 0.3764760  | -0.5382100 |
| C  | 3.8354300  | 1.7790830  | 2.4875370  |
| H  | 1.9548870  | 2.7211580  | 2.9518160  |
| H  | 5.6056280  | 0.7883210  | 1.7091070  |
| H  | 4.2739700  | 1.9545450  | 3.4708960  |
| N  | -1.5239270 | -1.0007920 | 1.0948080  |
| N  | 0.9219390  | -1.6668820 | -0.2027350 |
| N  | -1.3657780 | 1.6488420  | -0.0415280 |
| Mn | -0.2019790 | -0.0144860 | -0.0226740 |
| O  | 0.7475130  | 0.5523040  | 1.2555590  |

63

Triplet\_TS\_MnBnTPEN\_Oxo\_G3.log

63

Final Energy = -2545.9308078300

|   |            |            |            |
|---|------------|------------|------------|
| C | -3.0583110 | -0.0627160 | 0.4097390  |
| C | -1.8976080 | -0.6187130 | 2.3694450  |
| C | -3.0902110 | -0.8115000 | 3.0605430  |
| C | -4.2981410 | -0.6190210 | 2.3876120  |
| C | -4.2834550 | -0.2442930 | 1.0411560  |
| H | -0.9230060 | -0.7509300 | 2.8428870  |
| H | -3.0637020 | -1.1093800 | 4.1088250  |
| H | -5.2481010 | -0.7674140 | 2.9038660  |
| H | -5.2087740 | -0.0980670 | 0.4831960  |
| C | -2.8932630 | 0.3638380  | -1.0264270 |
| H | -2.8191790 | 1.4579450  | -1.0972670 |

|    |            |            |            |
|----|------------|------------|------------|
| H  | -3.7449940 | 0.0537690  | -1.6481070 |
| N  | -1.6215890 | -0.2354680 | -1.5258090 |
| C  | -1.0414680 | 0.4419280  | -2.7224860 |
| H  | -1.5688000 | 0.1299760  | -3.6352930 |
| H  | -1.1866670 | 1.5243920  | -2.6174310 |
| C  | 0.4281450  | 0.0746510  | -2.7968770 |
| H  | 0.5508090  | -1.0097180 | -2.9160150 |
| H  | 0.9101900  | 0.5520440  | -3.6622990 |
| N  | 1.1208300  | 0.4798410  | -1.5279760 |
| C  | -1.8260140 | -1.7031910 | -1.7765890 |
| H  | -1.8803780 | -1.8870490 | -2.8584420 |
| H  | -2.8034100 | -1.9922970 | -1.3650430 |
| C  | -0.7865510 | -2.5618470 | -1.1221640 |
| C  | -0.6685190 | -3.9232900 | -1.3983340 |
| C  | 0.2376270  | -4.6855790 | -0.6637620 |
| H  | -1.2896830 | -4.3744200 | -2.1728190 |
| C  | 0.8325670  | -2.7046510 | 0.5484810  |
| C  | 0.9904350  | -4.0673810 | 0.3378810  |
| H  | 0.3478700  | -5.7527580 | -0.8632050 |
| H  | 1.3934790  | -2.1875120 | 1.3253950  |
| H  | 1.6963670  | -4.6273010 | 0.9511940  |
| C  | 1.4072760  | 1.9454320  | -1.5284890 |
| H  | 1.5635580  | 2.3050460  | -2.5556950 |
| H  | 2.3571950  | 2.1182070  | -0.9996810 |
| C  | 2.3874510  | -0.2847010 | -1.3707170 |
| H  | 3.0585620  | -0.0572780 | -2.2124840 |
| H  | 2.1454050  | -1.3543320 | -1.4425290 |
| C  | 0.3468660  | 2.7382680  | -0.8258910 |
| C  | 0.2658840  | 4.1238640  | -0.9513740 |
| C  | -1.3360150 | 2.7321800  | 0.7887630  |
| C  | -0.6526580 | 4.8207580  | -0.1693080 |
| H  | 0.9259120  | 4.6423800  | -1.6475440 |
| C  | -1.4559790 | 4.1127210  | 0.7287830  |
| H  | -1.9493630 | 2.1498680  | 1.4734980  |
| H  | -0.7347980 | 5.9058190  | -0.2520430 |
| H  | -2.1740680 | 4.6182380  | 1.3743960  |
| C  | 3.1193830  | -0.0327840 | -0.0765580 |
| C  | 2.4675710  | 0.0736400  | 1.1952250  |
| C  | 4.5078250  | 0.0257510  | -0.0754890 |
| C  | 3.2127440  | 0.0800420  | 2.4086780  |
| H  | 1.9191810  | 1.1460660  | 1.4582630  |
| C  | 5.2435980  | 0.1100680  | 1.1182340  |
| H  | 5.0374910  | -0.0132170 | -1.0290550 |
| C  | 4.6013920  | 0.1322960  | 2.3564650  |
| H  | 2.6641700  | 0.0997590  | 3.3514500  |
| H  | 6.3330410  | 0.1491910  | 1.0693620  |
| H  | 5.1752120  | 0.1787160  | 3.2827370  |
| N  | -1.8953570 | -0.2490150 | 1.0791470  |
| N  | -0.0236410 | -1.9662070 | -0.1853070 |
| N  | -0.4660240 | 2.0543890  | 0.0093270  |
| Mn | -0.2487730 | 0.0366050  | -0.0323970 |
| O  | 1.0466050  | 0.0894650  | 1.3418640  |

63

TS<sub>HT</sub>

63

|                |                  |                       |
|----------------|------------------|-----------------------|
| Final Energy = | -2545.9308080900 |                       |
| C              | -3.0583770       | -0.0608300 0.4096820  |
| C              | -1.8981000       | -0.6174890 2.3694490  |
| C              | -3.0908520       | -0.8094380 3.0605250  |
| C              | -4.2986350       | -0.6161950 2.3875500  |
| C              | -4.2836600       | -0.2415640 1.0410700  |
| H              | -0.9236020       | -0.7503410 2.8429280  |
| H              | -3.0645700       | -1.1072710 4.1088260  |
| H              | -5.2487080       | -0.7639270 2.9037850  |
| H              | -5.2088620       | -0.0947670 0.4830680  |
| C              | -2.8930190       | 0.3654860 -1.0265150  |
| H              | -2.8181870       | 1.4595370 -1.0974540  |
| H              | -3.7449550       | 0.0559350 -1.6481730  |
| N              | -1.6217400       | -0.2347360 -1.5258050 |
| C              | -1.0411680       | 0.4421050 -2.7225770  |
| H              | -1.5686960       | 0.1303940 -3.6353540  |
| H              | -1.1856480       | 1.5246790 -2.6176570  |
| C              | 0.4282020        | 0.0738410 -2.7968760  |
| H              | 0.5501430        | -1.0106370 -2.9157460 |
| H              | 0.9105830        | 0.5507000 -3.6624040  |
| N              | 1.1211170        | 0.4788690 -1.5280540  |
| C              | -1.8271370       | -1.7023650 -1.7763640 |
| H              | -1.8817030       | -1.8863290 -2.8581870 |
| H              | -2.8046840       | -1.9907720 -1.3646950 |
| C              | -0.7881820       | -2.5616130 -1.1218880 |
| C              | -0.6710020       | -3.9231690 -1.3978810 |
| C              | 0.2346940        | -4.6859270 -0.6632400 |
| H              | -1.2924560       | -4.3740350 -2.1722860 |
| C              | 0.8309250        | -2.7052140 0.5487100  |
| C              | 0.9879340        | -4.0680690 0.3382860  |
| H              | 0.3442590        | -5.7532010 -0.8625480 |
| H              | 1.3922100        | -2.1883160 1.3255170  |
| H              | 1.6935390        | -4.6283480 0.9516450  |
| C              | 1.4084170        | 1.9442940 -1.5288510  |
| H              | 1.5647280        | 2.3036460 -2.5561420  |
| H              | 2.3585270        | 2.1166000 -1.0002370  |
| C              | 2.3872690        | -0.2864190 -1.3705900 |
| H              | 3.0584970        | -0.0597380 -2.2124620 |
| H              | 2.1445290        | -1.3559180 -1.4419920 |
| C              | 0.3486010        | 2.7378690 -0.8261830  |
| C              | 0.2685140        | 4.1235100 -0.9517510  |
| C              | -1.3341030       | 2.7330000 0.7886630   |
| C              | -0.6494960       | 4.8210580 -0.1696470  |
| H              | 0.9288230        | 4.6415530 -1.6480090  |
| C              | -1.4531840       | 4.1136110 0.7285810   |
| H              | -1.9477350       | 2.1511470 1.4735380   |
| H              | -0.7309350       | 5.9061670 -0.2524510  |
| H              | -2.1708750       | 4.6196430 1.3742340   |
| C              | 3.1193540        | -0.0344460 -0.0765320 |
| C              | 2.4675940        | 0.0723600 1.1952470   |
| C              | 4.5078050        | 0.0238000 -0.0755140  |
| C              | 3.2127990        | 0.0787390 2.4086780   |
| H              | 1.9195840        | 1.1449940 1.4581770   |

|    |            |            |            |
|----|------------|------------|------------|
| C  | 5.2436310  | 0.1081290  | 1.1181780  |
| H  | 5.0374290  | -0.0154270 | -1.0290920 |
| C  | 4.6014620  | 0.1306440  | 2.3564190  |
| H  | 2.6642560  | 0.0987250  | 3.3514620  |
| H  | 6.3330810  | 0.1470260  | 1.0692710  |
| H  | 5.1753160  | 0.1770400  | 3.2826720  |
| N  | -1.8955610 | -0.2478610 | 1.0791310  |
| N  | -0.0248630 | -1.9663350 | -0.1851330 |
| N  | -0.4646410 | 2.0545790  | 0.0091770  |
| Mn | -0.2487540 | 0.0366290  | -0.0324110 |
| O  | 1.0466330  | 0.0887070  | 1.3418800  |

65

MnBnTPEN\_Hydroperoxo\_G1.log

65

Final Energy = -2620.8380578700

|   |            |            |            |
|---|------------|------------|------------|
| C | -3.2175930 | -0.0918030 | 0.9123140  |
| C | -3.4357770 | 0.3334430  | -1.3748860 |
| C | -4.8145090 | 0.4783930  | -1.2539890 |
| C | -5.4001410 | 0.3327710  | 0.0051000  |
| C | -4.5890030 | 0.0485310  | 1.1058430  |
| H | -2.9242410 | 0.4405160  | -2.3325740 |
| H | -5.4123240 | 0.7070020  | -2.1367080 |
| H | -6.4781910 | 0.4466500  | 0.1317500  |
| H | -5.0087430 | -0.0615800 | 2.1062350  |
| C | -2.2407020 | -0.4393690 | 2.0024090  |
| H | -2.0865040 | -1.5277610 | 2.0251390  |
| H | -2.6155100 | -0.1466020 | 2.9945220  |
| N | -0.9436000 | 0.2154930  | 1.6946370  |
| C | 0.2153080  | -0.4225570 | 2.3653600  |
| H | 0.2759570  | -0.1273620 | 3.4250080  |
| H | 0.0791840  | -1.5102630 | 2.3399900  |
| C | 1.4672690  | -0.0017570 | 1.6250960  |
| H | 1.5942050  | 1.0849050  | 1.7077150  |
| H | 2.3613550  | -0.4617270 | 2.0697860  |
| N | 1.3703910  | -0.3348480 | 0.1705430  |
| C | -1.0226010 | 1.6767410  | 1.9925730  |
| H | -0.2843500 | 1.9400930  | 2.7643410  |
| H | -2.0036880 | 1.9054270  | 2.4332510  |
| C | -0.8256260 | 2.5466740  | 0.7828660  |
| C | -0.8419800 | 3.9395250  | 0.8872740  |
| C | -0.6815660 | 4.7064220  | -0.2634660 |
| H | -0.9824360 | 4.4056030  | 1.8636710  |
| C | -0.4990570 | 2.6696040  | -1.5160880 |
| C | -0.5117480 | 4.0575470  | -1.4899630 |
| H | -0.6910230 | 5.7963910  | -0.2065100 |
| H | -0.3649690 | 2.1131020  | -2.4438270 |
| H | -0.3881110 | 4.6163550  | -2.4180400 |
| C | 1.7316420  | -1.7535070 | -0.0844660 |
| H | 2.5755920  | -2.0706760 | 0.5441110  |
| H | 2.0519900  | -1.8292110 | -1.1326630 |
| C | 2.2562790  | 0.5770910  | -0.6405550 |
| H | 1.8970230  | 1.5980750  | -0.4711070 |
| H | 2.0773650  | 0.3224700  | -1.6917070 |
| C | 0.5592610  | -2.6729390 | 0.0553540  |



|    |            |            |            |
|----|------------|------------|------------|
| C  | 0.7026850  | -4.0387440 | 0.2947570  |
| C  | -1.7353730 | -2.9083440 | -0.2455620 |
| C  | -0.4267580 | -4.8551220 | 0.2521650  |
| H  | 1.6916900  | -4.4499860 | 0.4996590  |
| C  | -1.6665080 | -4.2808160 | -0.0384910 |
| H  | -2.6856640 | -2.4234920 | -0.4664790 |
| H  | -0.3398720 | -5.9274890 | 0.4360710  |
| H  | -2.5742270 | -4.8816550 | -0.0982200 |
| C  | 3.7290650  | 0.4862730  | -0.3134760 |
| C  | 4.2966840  | 1.3223440  | 0.6612220  |
| C  | 4.5582850  | -0.4311460 | -0.9783280 |
| C  | 5.6527510  | 1.2269870  | 0.9825980  |
| H  | 3.6768150  | 2.0666110  | 1.1666950  |
| C  | 5.9146530  | -0.5292150 | -0.6589550 |
| H  | 4.1455280  | -1.0686580 | -1.7633660 |
| C  | 6.4639440  | 0.2960520  | 0.3269310  |
| H  | 6.0779000  | 1.8868810  | 1.7421330  |
| H  | 6.5455600  | -1.2474360 | -1.1873690 |
| H  | 7.5250230  | 0.2216920  | 0.5757170  |
| N  | -2.6640340 | 0.0510940  | -0.3128140 |
| N  | -0.6474870 | 1.9311870  | -0.3982890 |
| N  | -0.6473310 | -2.1180410 | -0.1798110 |
| Mn | -0.6465950 | -0.1056080 | -0.3838120 |
| O  | -0.4471280 | -0.1218550 | -2.0953650 |
| O  | 0.3143800  | -1.1540960 | -2.7095990 |
| H  | 0.3826560  | -0.8227380 | -3.6238960 |

65

MnBnTPEN\_Hydroperoxo\_G2.log

65

Final Energy = -2620.8380554000

|   |            |            |            |
|---|------------|------------|------------|
| C | 3.2297440  | 0.1274090  | 0.8913700  |
| C | 3.4294430  | -0.2981190 | -1.3974440 |
| C | 4.8112790  | -0.4236470 | -1.2909940 |
| C | 5.4082240  | -0.2678550 | -0.0384400 |
| C | 4.6049460  | 0.0066560  | 1.0705300  |
| H | 2.9092590  | -0.4138040 | -2.3494660 |
| H | 5.4028730  | -0.6452340 | -2.1796840 |
| H | 6.4890570  | -0.3664330 | 0.0768180  |
| H | 5.0334950  | 0.1241190  | 2.0663670  |
| C | 2.2595510  | 0.4625570  | 1.9913950  |
| H | 2.0904490  | 1.5487700  | 2.0149950  |
| H | 2.6486530  | 0.1758740  | 2.9797530  |
| N | 0.9683760  | -0.2101340 | 1.6975720  |
| C | -0.1920410 | 0.4129240  | 2.3794280  |
| H | -0.2369150 | 0.1188070  | 3.4401450  |
| H | -0.0709070 | 1.5023580  | 2.3507750  |
| C | -1.4459340 | -0.0274730 | 1.6535980  |
| H | -1.5555790 | -1.1157990 | 1.7401040  |
| H | -2.3414990 | 0.4206550  | 2.1073310  |
| N | -1.3695730 | 0.3031690  | 0.1972170  |
| C | 1.0695930  | -1.6699980 | 1.9955540  |
| H | 0.3458910  | -1.9416100 | 2.7781510  |
| H | 2.0595210  | -1.8862060 | 2.4222320  |
| C | 0.8667310  | -2.5434910 | 0.7893470  |

|    |            |            |            |
|----|------------|------------|------------|
| C  | 0.8962830  | -3.9359980 | 0.8951690  |
| C  | 0.7309700  | -4.7056290 | -0.2530880 |
| H  | 1.0505100  | -4.3996480 | 1.8706230  |
| C  | 0.5179420  | -2.6720680 | -1.5061660 |
| C  | 0.5431730  | -4.0598020 | -1.4785820 |
| H  | 0.7504340  | -5.7954040 | -0.1950240 |
| H  | 0.3695190  | -2.1176940 | -2.4330100 |
| H  | 0.4150750  | -4.6208250 | -2.4047230 |
| C  | -1.7561960 | 1.7152900  | -0.0570330 |
| H  | -2.5978540 | 2.0203430  | 0.5806310  |
| H  | -2.0913370 | 1.7838360  | -1.1010390 |
| C  | -2.2481160 | -0.6242800 | -0.6041440 |
| H  | -1.8923380 | -1.6422220 | -0.4097370 |
| H  | -2.0581990 | -0.3914640 | -1.6582370 |
| C  | -0.5969350 | 2.6533220  | 0.0678610  |
| C  | -0.7594550 | 4.0176980  | 0.3035370  |
| C  | 1.6914150  | 2.9233810  | -0.2526560 |
| C  | 0.3568110  | 4.8512600  | 0.2492020  |
| H  | -1.7528710 | 4.4145530  | 0.5152220  |
| C  | 1.6030160  | 4.2952710  | -0.0494760 |
| H  | 2.6473090  | 2.4526220  | -0.4798190 |
| H  | 0.2547970  | 5.9227600  | 0.4303670  |
| H  | 2.5008430  | 4.9098490  | -0.1182800 |
| C  | -3.7246620 | -0.5202180 | -0.2996760 |
| C  | -4.3046840 | -1.2902780 | 0.7211030  |
| C  | -4.5454390 | 0.3481620  | -1.0366170 |
| C  | -5.6653060 | -1.1760080 | 1.0158440  |
| H  | -3.6921170 | -1.9981370 | 1.2840440  |
| C  | -5.9064870 | 0.4646250  | -0.7444000 |
| H  | -4.1203240 | 0.9318120  | -1.8565810 |
| C  | -6.4684160 | -0.2933110 | 0.2872500  |
| H  | -6.1007020 | -1.7840870 | 1.8119440  |
| H  | -6.5306820 | 1.1440640  | -1.3290760 |
| H  | -7.5330030 | -0.2048630 | 0.5156170  |
| N  | 2.6651650  | -0.0248560 | -0.3276420 |
| N  | 0.6713430  | -1.9312160 | -0.3907110 |
| N  | 0.6163080  | 2.1165500  | -0.1751230 |
| Mn | 0.6452220  | 0.1046760  | -0.3774190 |
| O  | 0.4315830  | 0.1185310  | -2.0873120 |
| O  | -0.3560520 | 1.1356660  | -2.6939500 |
| H  | -0.4221840 | 0.8056630  | -3.6088790 |

65

MnBnTPEN\_Hydroperoxo\_G3.log

65

Final Energy = -2620.8300248200

|   |            |            |            |
|---|------------|------------|------------|
| C | -2.6445880 | -1.7458530 | 0.6341240  |
| C | -2.4220970 | -1.6457030 | -1.6860520 |
| C | -3.4201820 | -2.5999680 | -1.8583380 |
| C | -4.0337620 | -3.1492310 | -0.7318000 |
| C | -3.6460550 | -2.7063080 | 0.5340850  |
| H | -1.8998910 | -1.2099550 | -2.5356380 |
| H | -3.7047740 | -2.9014390 | -2.8667180 |
| H | -4.8170080 | -3.9020270 | -0.8363410 |
| H | -4.1205800 | -3.0871910 | 1.4388540  |

|    |            |            |            |
|----|------------|------------|------------|
| C  | -2.1698590 | -1.1462060 | 1.9254060  |
| H  | -1.3057670 | -1.7092430 | 2.3071360  |
| H  | -2.9557270 | -1.1726860 | 2.6968480  |
| N  | -1.7316440 | 0.2348600  | 1.6187060  |
| C  | -0.9387660 | 0.8547910  | 2.7153520  |
| H  | -1.5875970 | 1.4345600  | 3.3876070  |
| H  | -0.5053430 | 0.0493990  | 3.3200210  |
| C  | 0.1419410  | 1.7397330  | 2.1277840  |
| H  | -0.2885880 | 2.6155130  | 1.6292550  |
| H  | 0.8113800  | 2.1124330  | 2.9201160  |
| N  | 0.9207350  | 0.9649550  | 1.1205710  |
| C  | -2.9014260 | 1.0831250  | 1.2683070  |
| H  | -3.3475740 | 1.5212780  | 2.1726110  |
| H  | -3.6750230 | 0.4501490  | 0.8093710  |
| C  | -2.5240790 | 2.1341670  | 0.2703860  |
| C  | -3.2229060 | 3.3323810  | 0.1353720  |
| C  | -2.8613340 | 4.2132660  | -0.8837170 |
| H  | -4.0393360 | 3.5627190  | 0.8208760  |
| C  | -1.1588270 | 2.6539750  | -1.5345750 |
| C  | -1.8144690 | 3.8632170  | -1.7385320 |
| H  | -3.3907500 | 5.1595020  | -1.0094300 |
| H  | -0.3414930 | 2.3333390  | -2.1806410 |
| H  | -1.5001090 | 4.5162520  | -2.5531050 |
| C  | 1.7395320  | -0.0685010 | 1.8126280  |
| H  | 1.3260850  | -0.2482140 | 2.8133140  |
| H  | 2.7649710  | 0.2848450  | 1.9705960  |
| C  | 1.7953320  | 1.9305320  | 0.3247000  |
| H  | 2.0018560  | 2.7840930  | 0.9858630  |
| H  | 1.1934360  | 2.3064100  | -0.5088060 |
| C  | 1.7280030  | -1.3683590 | 1.0746990  |
| C  | 2.7312250  | -2.3203950 | 1.2567210  |
| C  | 0.5409870  | -2.7976260 | -0.3130140 |
| C  | 2.6111090  | -3.5579010 | 0.6310380  |
| H  | 3.5909770  | -2.0814170 | 1.8837550  |
| C  | 1.4871960  | -3.8026000 | -0.1614010 |
| H  | -0.3254480 | -2.9512750 | -0.9506910 |
| H  | 3.3822820  | -4.3199960 | 0.7573090  |
| H  | 1.3452870  | -4.7552730 | -0.6723170 |
| C  | 3.1140940  | 1.3761010  | -0.1555830 |
| C  | 3.2049990  | 0.4163350  | -1.1755380 |
| C  | 4.2971640  | 1.8284450  | 0.4511570  |
| C  | 4.4485210  | -0.0857160 | -1.5661390 |
| H  | 2.3097310  | 0.0444420  | -1.6661650 |
| C  | 5.5418450  | 1.3317150  | 0.0562790  |
| H  | 4.2418040  | 2.5769070  | 1.2457450  |
| C  | 5.6198610  | 0.3676880  | -0.9525520 |
| H  | 4.4995660  | -0.8373440 | -2.3571310 |
| H  | 6.4503150  | 1.6972220  | 0.5400750  |
| H  | 6.5905310  | -0.0271010 | -1.2612440 |
| N  | -2.0349940 | -1.2431680 | -0.4626270 |
| N  | -1.4992080 | 1.8114270  | -0.5422980 |
| N  | 0.6541600  | -1.5985340 | 0.2913010  |
| Mn | -0.5149040 | 0.0462210  | -0.1370970 |
| O  | 0.0255310  | 0.1419700  | -1.7790720 |

|   |           |            |            |
|---|-----------|------------|------------|
| O | 0.4776240 | -0.9870880 | -2.5206600 |
| H | 0.5200540 | -0.6138530 | -3.4201980 |

68

MnBnTPEN\_MeCN\_G1.log

68

|                |            |                  |            |
|----------------|------------|------------------|------------|
| Final Energy = |            | -2602.4603401200 |            |
| C              | 3.0256980  | -0.2386370       | -1.3636330 |
| C              | 3.4299930  | -0.2342910       | 0.9439350  |
| C              | 4.7873890  | -0.4532460       | 0.7386240  |
| C              | 5.2599160  | -0.5949090       | -0.5675190 |
| C              | 4.3677110  | -0.4749200       | -1.6353560 |
| H              | 3.0189390  | -0.1230590       | 1.9469100  |
| H              | 5.4547030  | -0.5135070       | 1.5983230  |
| H              | 6.3189080  | -0.7792860       | -0.7553770 |
| H              | 4.7048450  | -0.5459880       | -2.6696760 |
| C              | 1.9571900  | -0.0162370       | -2.3869750 |
| H              | 1.4477610  | -0.9625360       | -2.6202320 |
| H              | 2.3653690  | 0.3849700        | -3.3265830 |
| N              | 0.9762500  | 0.9162680        | -1.7698520 |
| C              | -0.2887770 | 1.0207650        | -2.5645010 |
| H              | -0.3072870 | 1.9524920        | -3.1441060 |
| H              | -0.3121710 | 0.2019740        | -3.2924280 |
| C              | -1.4677850 | 0.9617770        | -1.6207610 |
| H              | -1.5667630 | 1.8903040        | -1.0475140 |
| H              | -2.4083380 | 0.8107480        | -2.1697340 |
| N              | -1.2354700 | -0.1571320       | -0.6662330 |
| C              | 1.5917390  | 2.2620050        | -1.5856360 |
| H              | 1.4821760  | 2.8667760        | -2.4958970 |
| H              | 2.6713720  | 2.1463340        | -1.4102320 |
| C              | 1.0025790  | 2.9338610        | -0.3894920 |
| C              | 0.9529650  | 4.3137410        | -0.2334050 |
| C              | 0.4645560  | 4.8417780        | 0.9630260  |
| H              | 1.2958360  | 4.9611410        | -1.0407370 |
| C              | 0.1169190  | 2.6032820        | 1.7476280  |
| C              | 0.0453570  | 3.9706900        | 1.9712110  |
| H              | 0.4126110  | 5.9224210        | 1.1062190  |
| H              | -0.2031620 | 1.8981930        | 2.5119330  |
| H              | -0.3381070 | 4.3395830        | 2.9224550  |
| C              | -1.3729860 | -1.4643330       | -1.3558320 |
| H              | -1.0661100 | -1.3556680       | -2.4031550 |
| H              | -2.4264530 | -1.7718810       | -1.3793940 |
| C              | -2.1577160 | -0.0889630       | 0.5401100  |
| H              | -1.8867990 | 0.8141600        | 1.1004380  |
| H              | -1.9275270 | -0.9634750       | 1.1580160  |
| C              | -0.4966820 | -2.4736570       | -0.6984670 |
| C              | -0.7324990 | -3.8450480       | -0.7769110 |
| C              | 1.4504210  | -2.8101160       | 0.5116920  |
| C              | 0.1787010  | -4.7198350       | -0.1897620 |
| H              | -1.6202280 | -4.2106330       | -1.2937660 |
| C              | 1.2914050  | -4.1889360       | 0.4653120  |
| H              | 2.3003530  | -2.3799720       | 1.0362020  |
| H              | 0.0199340  | -5.7984690       | -0.2362330 |
| H              | 2.0305940  | -4.8287370       | 0.9475810  |
| C              | -3.6281150 | -0.0580540       | 0.2025030  |

|    |            |            |            |
|----|------------|------------|------------|
| C  | -4.2776290 | 1.1589210  | -0.0560040 |
| C  | -4.3670070 | -1.2511120 | 0.1556040  |
| C  | -5.6342220 | 1.1797830  | -0.3849730 |
| H  | -3.7258080 | 2.0989590  | 0.0126990  |
| C  | -5.7245650 | -1.2296460 | -0.1733210 |
| H  | -3.8861330 | -2.2025490 | 0.3962570  |
| C  | -6.3579980 | -0.0150900 | -0.4510890 |
| H  | -6.1290020 | 2.1329020  | -0.5830080 |
| H  | -6.2889920 | -2.1638900 | -0.2047020 |
| H  | -7.4194470 | 0.0020890  | -0.7078160 |
| N  | 2.5748810  | -0.1446280 | -0.0929280 |
| N  | 0.5754180  | 2.0916260  | 0.5826370  |
| N  | 0.5777480  | -1.9624710 | -0.0657060 |
| Mn | 0.6211270  | 0.1384150  | 0.1671420  |
| N  | 0.4605230  | -0.4006250 | 2.0681010  |
| C  | 0.3727820  | -0.7758970 | 3.1580340  |
| C  | 0.2573430  | -1.2457750 | 4.5178870  |
| H  | 0.6963120  | -2.2515680 | 4.5948520  |
| H  | 0.7859460  | -0.5547470 | 5.1912220  |
| H  | -0.8070670 | -1.2861440 | 4.7952290  |

68

MnBnTPEN\_MeCN\_G2.log

68

Final Energy = -2602.4562737100

|   |            |            |            |
|---|------------|------------|------------|
| C | 2.2885570  | -1.9808240 | -0.9268960 |
| C | 2.2506840  | -1.9328910 | 1.4074470  |
| C | 3.0645160  | -3.0580490 | 1.4764900  |
| C | 3.4730350  | -3.6729820 | 0.2923490  |
| C | 3.0920470  | -3.1148140 | -0.9291890 |
| H | 1.9207150  | -1.4237070 | 2.3100320  |
| H | 3.3678460  | -3.4371450 | 2.4524370  |
| H | 4.1026000  | -4.5638880 | 0.3180350  |
| H | 3.4256510  | -3.5383880 | -1.8768170 |
| C | 1.8754600  | -1.2190270 | -2.1447880 |
| H | 0.9049310  | -1.5782520 | -2.5156210 |
| H | 2.6051630  | -1.3259190 | -2.9617050 |
| N | 1.7338570  | 0.1994500  | -1.7261010 |
| C | 1.0878330  | 1.0326420  | -2.7923360 |
| H | 1.8293260  | 1.6721260  | -3.2871620 |
| H | 0.6864520  | 0.3662220  | -3.5643330 |
| C | 0.0091320  | 1.8673840  | -2.1479070 |
| H | 0.4398930  | 2.6897180  | -1.5657880 |
| H | -0.6733540 | 2.3062100  | -2.8918170 |
| N | -0.7509330 | 0.9870710  | -1.2155030 |
| C | 3.0619230  | 0.7648530  | -1.3500950 |
| H | 3.5885960  | 1.1367490  | -2.2389720 |
| H | 3.6859400  | -0.0320680 | -0.9216600 |
| C | 2.8876720  | 1.8258490  | -0.3132940 |
| C | 3.7824180  | 2.8751170  | -0.1359460 |
| C | 3.5725480  | 3.7732140  | 0.9114800  |
| H | 4.6305180  | 2.9814100  | -0.8127950 |
| C | 1.6157010  | 2.5258360  | 1.5126080  |
| C | 2.4707870  | 3.5931300  | 1.7502990  |
| H | 4.2601840  | 4.6060560  | 1.0681810  |

|    |            |            |            |
|----|------------|------------|------------|
| H  | 0.7467960  | 2.3617910  | 2.1473770  |
| H  | 2.2668210  | 4.2698300  | 2.5800910  |
| C  | -1.5846150 | 0.0194400  | -1.9687990 |
| H  | -1.0676650 | -0.2363910 | -2.9017830 |
| H  | -2.5415700 | 0.4727290  | -2.2546200 |
| C  | -1.5215950 | 1.8225360  | -0.1957100 |
| H  | -1.4289380 | 2.8675810  | -0.5158390 |
| H  | -0.9835280 | 1.7590660  | 0.7631380  |
| C  | -1.7690790 | -1.2122920 | -1.1524240 |
| C  | -2.8147930 | -2.1096240 | -1.3594550 |
| C  | -0.9000060 | -2.5109810 | 0.5594870  |
| C  | -2.8871410 | -3.2502010 | -0.5652140 |
| H  | -3.5619630 | -1.8976290 | -2.1245450 |
| C  | -1.9114280 | -3.4505450 | 0.4149090  |
| H  | -0.1367710 | -2.6418430 | 1.3231480  |
| H  | -3.6974780 | -3.9685980 | -0.6995200 |
| H  | -1.9295280 | -4.3221500 | 1.0693490  |
| C  | -2.9680080 | 1.4602670  | -0.0010590 |
| C  | -3.3699000 | 0.4910880  | 0.9286930  |
| C  | -3.9404460 | 2.1000230  | -0.7861710 |
| C  | -4.7182880 | 0.1554330  | 1.0625400  |
| H  | -2.6314190 | -0.0153950 | 1.5474720  |
| C  | -5.2886190 | 1.7619500  | -0.6553430 |
| H  | -3.6376900 | 2.8639620  | -1.5068010 |
| C  | -5.6790070 | 0.7862390  | 0.2675180  |
| H  | -5.0163830 | -0.6033720 | 1.7885470  |
| H  | -6.0356840 | 2.2641410  | -1.2733400 |
| H  | -6.7336130 | 0.5217650  | 0.3702640  |
| N  | 1.8529690  | -1.4246980 | 0.2252910  |
| N  | 1.8148780  | 1.6600420  | 0.4954820  |
| N  | -0.8221050 | -1.4112410 | -0.2149640 |
| Mn | 0.5792670  | 0.1318640  | 0.0587240  |
| N  | -0.0377490 | -0.0028180 | 1.9606630  |
| C  | -0.3956860 | -0.1078350 | 3.0550370  |
| C  | -0.8606020 | -0.2461690 | 4.4138820  |
| H  | -1.0865820 | -1.3041040 | 4.6144820  |
| H  | -0.0834550 | 0.1086550  | 5.1068240  |
| H  | -1.7725030 | 0.3569880  | 4.5428630  |

68

MnBnTPEN\_MeCN\_G3.log

68

Final Energy = -2602.4603400800

|   |            |            |            |
|---|------------|------------|------------|
| C | -3.0256470 | 0.2387990  | -1.3637590 |
| C | -3.4301050 | 0.2347480  | 0.9437680  |
| C | -4.7874550 | 0.4538470  | 0.7383380  |
| C | -5.2598750 | 0.5954440  | -0.5678530 |
| C | -4.3676050 | 0.4752360  | -1.6356080 |
| H | -3.0191600 | 0.1235550  | 1.9467950  |
| H | -5.4548190 | 0.5142710  | 1.5979880  |
| H | -6.3188290 | 0.7799380  | -0.7558030 |
| H | -4.7046380 | 0.5462500  | -2.6699640 |
| C | -1.9571120 | 0.0161940  | -2.3870320 |
| H | -1.4476160 | 0.9624380  | -2.6203760 |
| H | -2.3652990 | -0.3850630 | -3.3266150 |

|    |            |            |            |
|----|------------|------------|------------|
| N  | -0.9762830 | -0.9163480 | -1.7697920 |
| C  | 0.2887780  | -1.0210500 | -2.5643570 |
| H  | 0.3072500  | -1.9528500 | -3.1438470 |
| H  | 0.3122950  | -0.2023480 | -3.2923800 |
| C  | 1.4677570  | -0.9620030 | -1.6205900 |
| H  | 1.5667540  | -1.8904720 | -1.0472580 |
| H  | 2.4083090  | -0.8109910 | -2.1695690 |
| N  | 1.2354060  | 0.1569920  | -0.6661530 |
| C  | -1.5919290 | -2.2620000 | -1.5855250 |
| H  | -1.4826150 | -2.8667300 | -2.4958470 |
| H  | -2.6715130 | -2.1461850 | -1.4098920 |
| C  | -1.0026010 | -2.9339510 | -0.3895160 |
| C  | -0.9530050 | -4.3138440 | -0.2335250 |
| C  | -0.4643780 | -4.8419630 | 0.9627790  |
| H  | -1.2960600 | -4.9611750 | -1.0408340 |
| C  | -0.1165350 | -2.6035190 | 1.7474520  |
| C  | -0.0449580 | -3.9709430 | 1.9709320  |
| H  | -0.4124200 | -5.9226150 | 1.1059020  |
| H  | 0.2037070  | -1.8984940 | 2.5117520  |
| H  | 0.3386880  | -4.3399070 | 2.9220750  |
| C  | 1.3728570  | 1.4641390  | -1.3558550 |
| H  | 1.0659390  | 1.3554310  | -2.4031580 |
| H  | 2.4263180  | 1.7716960  | -1.3795110 |
| C  | 2.1576910  | 0.0889620  | 0.5401860  |
| H  | 1.8869150  | -0.8141960 | 1.1005170  |
| H  | 1.9274050  | 0.9634480  | 1.1580910  |
| C  | 0.4966540  | 2.4735180  | -0.6984540 |
| C  | 0.7324930  | 3.8448960  | -0.7770450 |
| C  | -1.4501340 | 2.8101140  | 0.5121580  |
| C  | -0.1785420 | 4.7197480  | -0.1897400 |
| H  | 1.6201150  | 4.2104310  | -1.2941180 |
| C  | -1.2910910 | 4.1889240  | 0.4656570  |
| H  | -2.2999370 | 2.3800400  | 1.0369260  |
| H  | -0.0197590 | 5.7983740  | -0.2363310 |
| H  | -2.0301390 | 4.8287750  | 0.9480760  |
| C  | 3.6280790  | 0.0582470  | 0.2025140  |
| C  | 4.2777300  | -1.1586470 | -0.0560260 |
| C  | 4.3668200  | 1.2513970  | 0.1555480  |
| C  | 5.6343020  | -1.1793410 | -0.3850950 |
| H  | 3.7260430  | -2.0987580 | 0.0127330  |
| C  | 5.7243560  | 1.2301000  | -0.1734800 |
| H  | 3.8858490  | 2.2027820  | 0.3962130  |
| C  | 6.3579240  | 0.0156220  | -0.4512830 |
| H  | 6.1291850  | -2.1324020 | -0.5831530 |
| H  | 6.2886520  | 2.1644220  | -0.2049170 |
| H  | 7.4193530  | -0.0014310 | -0.7081010 |
| N  | -2.5749170 | 0.1448730  | -0.0930190 |
| N  | -0.5752380 | -2.0917820 | 0.5825790  |
| N  | -0.5776420 | 1.9624010  | -0.0654140 |
| Mn | -0.6212280 | -0.1384980 | 0.1672180  |
| N  | -0.4606760 | 0.4002900  | 2.0682830  |
| C  | -0.3730120 | 0.7754050  | 3.1582740  |
| C  | -0.2577040 | 1.2450840  | 4.5182070  |
| H  | -0.6965620 | 2.2509220  | 4.5952310  |

|   |            |           |           |
|---|------------|-----------|-----------|
| H | -0.7864700 | 0.5540220 | 5.1913810 |
| H | 0.8066690  | 1.2853040 | 4.7957100 |

63

MnBnTPEN\_Oxo\_G1.log

63

Final Energy = -2544.8799232900

|   |            |            |            |
|---|------------|------------|------------|
| C | -3.0706490 | -0.3218430 | -0.3027620 |
| C | -2.1253220 | 0.4949580  | -2.2934790 |
| C | -3.3793410 | 0.5962450  | -2.8827480 |
| C | -4.5075480 | 0.2286040  | -2.1483290 |
| C | -4.3493680 | -0.2331130 | -0.8406220 |
| H | -1.2211310 | 0.7650540  | -2.8374640 |
| H | -3.4565870 | 0.9629060  | -3.9064230 |
| H | -5.5038440 | 0.3055970  | -2.5864990 |
| H | -5.2063710 | -0.5207530 | -0.2313450 |
| C | -2.7716320 | -0.8422850 | 1.0710500  |
| H | -2.5728640 | -1.9221330 | 1.0322160  |
| H | -3.6209400 | -0.7010460 | 1.7538960  |
| N | -1.5587620 | -0.1425500 | 1.5563390  |
| C | -0.8340020 | -0.8716710 | 2.6276530  |
| H | -1.3372400 | -0.7484100 | 3.5989160  |
| H | -0.8381860 | -1.9438900 | 2.4015910  |
| C | 0.5592000  | -0.2961920 | 2.6762140  |
| H | 0.5328060  | 0.7659450  | 2.9512400  |
| H | 1.1785230  | -0.8092110 | 3.4243720  |
| N | 1.2247290  | -0.3955310 | 1.3302860  |
| C | -1.9147780 | 1.2345460  | 2.0101100  |
| H | -1.7494890 | 1.3317170  | 3.0920940  |
| H | -2.9910450 | 1.4009300  | 1.8573670  |
| C | -1.1800510 | 2.2962910  | 1.2602680  |
| C | -1.3376050 | 3.6468150  | 1.5775420  |
| C | -0.7498920 | 4.6107800  | 0.7661140  |
| H | -1.9368650 | 3.9236450  | 2.4455390  |
| C | 0.0988760  | 2.8427600  | -0.6117520 |
| C | -0.0376410 | 4.1979710  | -0.3637160 |
| H | -0.8619520 | 5.6711040  | 0.9978220  |
| H | 0.6369870  | 2.4863540  | -1.4867900 |
| H | 0.4148240  | 4.9127640  | -1.0512290 |
| C | 1.7174250  | -1.7821930 | 1.0933820  |
| H | 2.1608410  | -2.1954260 | 2.0097560  |
| H | 2.5128050  | -1.7335790 | 0.3373530  |
| C | 2.3987780  | 0.5940980  | 1.3474400  |
| H | 2.9403200  | 0.3694950  | 2.2794430  |
| H | 1.9541140  | 1.5891120  | 1.4534640  |
| C | 0.6677820  | -2.6710820 | 0.5240620  |
| C | 0.7254510  | -4.0581540 | 0.6150570  |
| C | -1.1461740 | -2.7892200 | -0.9549920 |
| C | -0.1894710 | -4.8205190 | -0.1087150 |
| H | 1.4910130  | -4.5236690 | 1.2355070  |
| C | -1.1245390 | -4.1737760 | -0.9230130 |
| H | -1.8604640 | -2.2580220 | -1.5778530 |
| H | -0.1660800 | -5.9098590 | -0.0495260 |
| H | -1.8385520 | -4.7309930 | -1.5290650 |
| C | 3.3501470  | 0.5384580  | 0.1899340  |



|    |            |            |            |
|----|------------|------------|------------|
| C  | 4.3873910  | -0.4140110 | 0.1440110  |
| C  | 3.2681260  | 1.4901910  | -0.8455370 |
| C  | 5.2589220  | -0.4591560 | -0.9418320 |
| H  | 4.5284760  | -1.1132220 | 0.9707590  |
| C  | 4.1404620  | 1.4461110  | -1.9345700 |
| H  | 2.5464130  | 2.3004330  | -0.7721530 |
| C  | 5.1268420  | 0.4611700  | -1.9928640 |
| H  | 6.0544670  | -1.2062150 | -0.9665680 |
| H  | 4.0562720  | 2.1923700  | -2.7265400 |
| H  | 5.8130230  | 0.4214290  | -2.8413270 |
| N  | -1.9864900 | 0.0410530  | -1.0308480 |
| N  | -0.4312850 | 1.9082870  | 0.2133030  |
| N  | -0.2815720 | -2.0544230 | -0.2179390 |
| Mn | -0.1811050 | -0.0745070 | -0.1727660 |
| O  | 0.7767090  | 0.2009630  | -1.3081010 |

63

MnBnTPEN\_Oxo\_G2.log

63

Final Energy = -2544.8799231200

|   |            |            |            |
|---|------------|------------|------------|
| C | -3.0704890 | -0.3216430 | -0.3030360 |
| C | -2.1248900 | 0.4951830  | -2.2936100 |
| C | -3.3788450 | 0.5966940  | -2.8829650 |
| C | -4.5071660 | 0.2291290  | -2.1486760 |
| C | -4.3491600 | -0.2327210 | -0.8409950 |
| H | -1.2206090 | 0.7652350  | -2.8374690 |
| H | -3.4559670 | 0.9634730  | -3.9066070 |
| H | -5.5034130 | 0.3062640  | -2.5869340 |
| H | -5.2062500 | -0.5203120 | -0.2318180 |
| C | -2.7716580 | -0.8422170 | 1.0707680  |
| H | -2.5729290 | -1.9220660 | 1.0318730  |
| H | -3.6210350 | -0.7009830 | 1.7535290  |
| N | -1.5588050 | -0.1425750 | 1.5562820  |
| C | -0.8341890 | -0.8718670 | 2.6276040  |
| H | -1.3375350 | -0.7486230 | 3.5988120  |
| H | -0.8384320 | -1.9440650 | 2.4014560  |
| C | 0.5590480  | -0.2965160 | 2.6763520  |
| H | 0.5327530  | 0.7656090  | 2.9514530  |
| H | 1.1782290  | -0.8096960 | 3.4245200  |
| N | 1.2246480  | -0.3958900 | 1.3304650  |
| C | -1.9147730 | 1.2344920  | 2.0101710  |
| H | -1.7494340 | 1.3315390  | 3.0921560  |
| H | -2.9910370 | 1.4009130  | 1.8574300  |
| C | -1.1800100 | 2.2962690  | 1.2603980  |
| C | -1.3376550 | 3.6467810  | 1.5776690  |
| C | -0.7498760 | 4.6107760  | 0.7663210  |
| H | -1.9370350 | 3.9235900  | 2.4455890  |
| C | 0.0992080  | 2.8428000  | -0.6114020 |
| C | -0.0374270 | 4.1980040  | -0.3633890 |
| H | -0.8620370 | 5.6710960  | 0.9980000  |
| H | 0.6376050  | 2.4864000  | -1.4862620 |
| H | 0.4151020  | 4.9128270  | -1.0508300 |
| C | 1.7172600  | -1.7825660 | 1.0935630  |
| H | 2.1605370  | -2.1958580 | 2.0099690  |
| H | 2.5127200  | -1.7339860 | 0.3376260  |

|    |            |            |            |
|----|------------|------------|------------|
| C  | 2.3987860  | 0.5936360  | 1.3476700  |
| H  | 2.9404240  | 0.3687340  | 2.2795530  |
| H  | 1.9541850  | 1.5886450  | 1.4540440  |
| C  | 0.6676390  | -2.6713490 | 0.5240560  |
| C  | 0.7252120  | -4.0584180 | 0.6149310  |
| C  | -1.1461820 | -2.7892310 | -0.9551660 |
| C  | -0.1897160 | -4.8206670 | -0.1089650 |
| H  | 1.4907090  | -4.5240610 | 1.2353690  |
| C  | -1.1246700 | -4.1737890 | -0.9232790 |
| H  | -1.8603500 | -2.2579620 | -1.5781040 |
| H  | -0.1664170 | -5.9100130 | -0.0498390 |
| H  | -1.8386920 | -4.7308870 | -1.5294310 |
| C  | 3.3499960  | 0.5382340  | 0.1900170  |
| C  | 3.2681790  | 1.4906050  | -0.8449040 |
| C  | 4.3869290  | -0.4145390 | 0.1434370  |
| C  | 4.1403720  | 1.4468510  | -1.9340560 |
| H  | 2.5467590  | 2.3010560  | -0.7709520 |
| C  | 5.2582900  | -0.4593810 | -0.9425570 |
| H  | 4.5279650  | -1.1141860 | 0.9698180  |
| C  | 5.1263840  | 0.4615760  | -1.9930520 |
| H  | 4.0563510  | 2.1935970  | -2.7255860 |
| H  | 6.0536040  | -1.2066670 | -0.9678090 |
| H  | 5.8124260  | 0.4220400  | -2.8416360 |
| N  | -1.9862230 | 0.0411200  | -1.0310170 |
| N  | -0.4310800 | 1.9082930  | 0.2135350  |
| N  | -0.2816030 | -2.0545280 | -0.2179830 |
| Mn | -0.1809840 | -0.0745730 | -0.1726190 |
| O  | 0.7767840  | 0.2013750  | -1.3078590 |

63

MnBnTPEN\_Oxo\_G3.log

63

Final Energy = -2544.8814804500

|   |            |            |            |
|---|------------|------------|------------|
| C | 3.2116700  | 0.0593970  | 0.7888900  |
| C | 3.3642790  | -0.5886750 | -1.4672650 |
| C | 4.7396030  | -0.7490260 | -1.3573690 |
| C | 5.3602270  | -0.4904740 | -0.1346170 |
| C | 4.5836890  | -0.0882580 | 0.9536750  |
| H | 2.8460990  | -0.7745400 | -2.4069620 |
| H | 5.3065120  | -1.0733790 | -2.2301950 |
| H | 6.4389720  | -0.6113300 | -0.0241530 |
| H | 5.0279380  | 0.1034180  | 1.9306570  |
| C | 2.2696510  | 0.4880080  | 1.8739120  |
| H | 2.1548170  | 1.5799810  | 1.8814580  |
| H | 2.6387320  | 0.2008380  | 2.8684730  |
| N | 0.9611050  | -0.1456100 | 1.5782770  |
| C | -0.1912260 | 0.5280460  | 2.2303090  |
| H | -0.2569180 | 0.2542650  | 3.2938580  |
| H | -0.0435070 | 1.6130510  | 2.1865350  |
| C | -1.4335430 | 0.0948480  | 1.4939520  |
| H | -1.5869240 | -0.9853830 | 1.5981330  |
| H | -2.3279380 | 0.5916540  | 1.8901720  |
| N | -1.3042280 | 0.3907480  | 0.0263680  |
| C | 1.0252620  | -1.5927410 | 1.9426000  |
| H | 0.4426100  | -1.7812750 | 2.8553590  |

|    |            |            |            |
|----|------------|------------|------------|
| H  | 2.0637490  | -1.8556080 | 2.1898040  |
| C  | 0.5841290  | -2.4834840 | 0.8277890  |
| C  | 0.3852650  | -3.8512890 | 1.0187450  |
| C  | 0.0693710  | -4.6522520 | -0.0741000 |
| H  | 0.4903130  | -4.2714010 | 2.0194700  |
| C  | 0.1528680  | -2.6975310 | -1.4611920 |
| C  | -0.0382960 | -4.0633820 | -1.3372680 |
| H  | -0.0878720 | -5.7242180 | 0.0550380  |
| H  | 0.0611310  | -2.2020540 | -2.4269300 |
| H  | -0.2767760 | -4.6492080 | -2.2251130 |
| C  | -1.5667530 | 1.8330590  | -0.2610960 |
| H  | -2.3941710 | 2.2030990  | 0.3571300  |
| H  | -1.8807260 | 1.9191090  | -1.3119480 |
| C  | -2.2731920 | -0.4836080 | -0.7728500 |
| H  | -1.9998280 | -1.5208820 | -0.5644100 |
| H  | -2.0775780 | -0.2740520 | -1.8312240 |
| C  | -0.3398430 | 2.6685140  | -0.1067170 |
| C  | -0.3882580 | 4.0427660  | 0.0995650  |
| C  | 1.9862140  | 2.7416150  | -0.4011900 |
| C  | 0.7966900  | 4.7760970  | 0.0487000  |
| H  | -1.3486760 | 4.5247950  | 0.2827930  |
| C  | 1.9977980  | 4.1161900  | -0.2276370 |
| H  | 2.9032910  | 2.1991060  | -0.6153660 |
| H  | 0.7820070  | 5.8550150  | 0.2111950  |
| H  | 2.9424970  | 4.6540080  | -0.3050190 |
| C  | -3.7181390 | -0.2467120 | -0.4267640 |
| C  | -4.3421600 | -1.0111590 | 0.5741640  |
| C  | -4.4696470 | 0.7231630  | -1.1122940 |
| C  | -5.6809750 | -0.7936680 | 0.8997200  |
| H  | -3.7838600 | -1.7936250 | 1.0925650  |
| C  | -5.8090800 | 0.9396530  | -0.7877390 |
| H  | -4.0143990 | 1.3002430  | -1.9198130 |
| C  | -6.4148140 | 0.1872460  | 0.2240630  |
| H  | -6.1552240 | -1.3965890 | 1.6766230  |
| H  | -6.3839110 | 1.6916680  | -1.3318460 |
| H  | -7.4632790 | 0.3572520  | 0.4781670  |
| N  | 2.6287210  | -0.1811610 | -0.4116110 |
| N  | 0.4489560  | -1.9242090 | -0.3882100 |
| N  | 0.8382580  | 2.0326860  | -0.3140040 |
| Mn | 0.6548740  | 0.0809200  | -0.5908110 |
| O  | 0.4295840  | 0.0247290  | -2.0784770 |

64

MnBnTPEN\_Peroxide\_Mn3\_G1.log

64

Final Energy = -2620.3804956900

|   |            |           |            |
|---|------------|-----------|------------|
| C | -3.3291550 | 0.0053270 | 0.8788960  |
| C | -3.6136230 | 0.4242400 | -1.3856390 |
| C | -4.9895970 | 0.5724820 | -1.2253670 |
| C | -5.5425730 | 0.4331800 | 0.0480660  |
| C | -4.6942180 | 0.1453970 | 1.1187630  |
| H | -3.1290500 | 0.4995020 | -2.3589790 |
| H | -5.6117800 | 0.7946260 | -2.0933950 |
| H | -6.6162280 | 0.5493180 | 0.2078640  |
| H | -5.0793580 | 0.0300030 | 2.1327450  |

|    |            |            |            |
|----|------------|------------|------------|
| C  | -2.3364920 | -0.3537430 | 1.9445270  |
| H  | -2.2026850 | -1.4450220 | 1.9619820  |
| H  | -2.6859410 | -0.0552440 | 2.9463280  |
| N  | -1.0407370 | 0.2660810  | 1.6041290  |
| C  | 0.0746270  | -0.4032720 | 2.3112870  |
| H  | 0.0886160  | -0.1235360 | 3.3783330  |
| H  | -0.0932230 | -1.4863880 | 2.2639760  |
| C  | 1.3820650  | -0.0314960 | 1.6519530  |
| H  | 1.5694510  | 1.0420170  | 1.7855120  |
| H  | 2.2178800  | -0.5643390 | 2.1330440  |
| N  | 1.3332950  | -0.3033610 | 0.1963170  |
| C  | -1.0890900 | 1.7262860  | 1.8919990  |
| H  | -0.6478910 | 1.9425860  | 2.8774050  |
| H  | -2.1455960 | 2.0279340  | 1.9564220  |
| C  | -0.4597430 | 2.5663540  | 0.8151890  |
| C  | -0.0492930 | 3.8807790  | 1.0435560  |
| C  | 0.4177880  | 4.6376440  | -0.0317130 |
| H  | -0.1046920 | 4.3005840  | 2.0491190  |
| C  | 0.0459750  | 2.7335560  | -1.4463110 |
| C  | 0.4551340  | 4.0557120  | -1.3013390 |
| H  | 0.7460300  | 5.6678300  | 0.1198890  |
| H  | 0.0525610  | 2.2062570  | -2.4006710 |
| H  | 0.8081960  | 4.6127490  | -2.1702720 |
| C  | 1.5680360  | -1.7310710 | -0.1181510 |
| H  | 2.3910560  | -2.1446600 | 0.4850370  |
| H  | 1.8820890  | -1.7796750 | -1.1700470 |
| C  | 2.3260370  | 0.5500310  | -0.5321040 |
| H  | 2.1399510  | 1.5849000  | -0.2242930 |
| H  | 2.0674990  | 0.4622320  | -1.5940390 |
| C  | 0.3452420  | -2.6010870 | -0.0134890 |
| C  | 0.4498030  | -3.9665060 | 0.2580840  |
| C  | -1.9373930 | -2.7946250 | -0.3781060 |
| C  | -0.6930510 | -4.7636890 | 0.1940120  |
| H  | 1.4221840  | -4.3941940 | 0.5069760  |
| C  | -1.9084460 | -4.1669220 | -0.1459650 |
| H  | -2.8693850 | -2.2916780 | -0.6352830 |
| H  | -0.6342260 | -5.8339940 | 0.4007880  |
| H  | -2.8276730 | -4.7485980 | -0.2252110 |
| C  | 3.7769650  | 0.2015720  | -0.2869520 |
| C  | 4.4683050  | 0.7178920  | 0.8211790  |
| C  | 4.4646970  | -0.6491370 | -1.1666920 |
| C  | 5.8019120  | 0.3743610  | 1.0573860  |
| H  | 3.9640980  | 1.4081940  | 1.5011460  |
| C  | 5.7985270  | -0.9950720 | -0.9349050 |
| H  | 3.9524850  | -1.0393280 | -2.0497650 |
| C  | 6.4693840  | -0.4881480 | 0.1821510  |
| H  | 6.3235560  | 0.7874650  | 1.9239180  |
| H  | 6.3167940  | -1.6576820 | -1.6320320 |
| H  | 7.5127430  | -0.7559570 | 0.3646230  |
| N  | -2.7975390 | 0.1502700  | -0.3539290 |
| N  | -0.3923490 | 2.0052120  | -0.4050140 |
| N  | -0.8398750 | -2.0237720 | -0.2976730 |
| Mn | -0.7254120 | 0.0086530  | -0.5168200 |
| O  | -1.0654540 | 0.3018760  | -2.3524380 |

|                              |            |                  |            |
|------------------------------|------------|------------------|------------|
| O                            | 0.1001220  | -0.4210650       | -2.1762250 |
| 64                           |            |                  |            |
| MnBnTPEN_Peroxide_Mn3_G2.log |            |                  |            |
| 64                           |            |                  |            |
| Final Energy =               |            | -2620.3804957400 |            |
| C                            | 3.3291610  | -0.0055120       | 0.8786200  |
| C                            | 3.6136420  | -0.4245380       | -1.3858760 |
| C                            | 4.9896570  | -0.5722520       | -1.2256890 |
| C                            | 5.5426980  | -0.4326050       | 0.0476970  |
| C                            | 4.6943120  | -0.1450410       | 1.1184100  |
| H                            | 3.1289710  | -0.5000360       | -2.3591550 |
| H                            | 5.6118580  | -0.7942290       | -2.0937480 |
| H                            | 6.6164130  | -0.5483160       | 0.2073910  |
| H                            | 5.0794380  | -0.0293790       | 2.1323670  |
| C                            | 2.3365760  | 0.3533640        | 1.9444140  |
| H                            | 2.2027780  | 1.4446420        | 1.9621060  |
| H                            | 2.6861930  | 0.0546920        | 2.9461040  |
| N                            | 1.0407930  | -0.2664280       | 1.6041160  |
| C                            | -0.0745630 | 0.4028390        | 2.3113750  |
| H                            | -0.0886430 | 0.1228490        | 3.3783530  |
| H                            | 0.0933550  | 1.4859540        | 2.2643100  |
| C                            | -1.3820240 | 0.0312830        | 1.6519430  |
| H                            | -1.5695040 | -1.0422300       | 1.7853500  |
| H                            | -2.2177580 | 0.5641440        | 2.1331620  |
| N                            | -1.3332830 | 0.3033780        | 0.1963510  |
| C                            | 1.0892290  | -1.7266500       | 1.8919230  |
| H                            | 0.6484450  | -1.9429570       | 2.8775140  |
| H                            | 2.1457660  | -2.0282900       | 1.9558710  |
| C                            | 0.4594430  | -2.5666350       | 0.8153210  |
| C                            | 0.0486910  | -3.8809520       | 1.0437780  |
| C                            | -0.4187980 | -4.6376880       | -0.0314010 |
| H                            | 0.1041600  | -4.3007700       | 2.0493300  |
| C                            | -0.0467410 | -2.7337320       | -1.4460930 |
| C                            | -0.4562330 | -4.0557810       | -1.3010320 |
| H                            | -0.7472770 | -5.6677890       | 0.1202810  |
| H                            | -0.0532810 | -2.2064070       | -2.4004440 |
| H                            | -0.8096030 | -4.6127530       | -2.1698800 |
| C                            | -1.5677390 | 1.7311650        | -0.1178580 |
| H                            | -2.3906520 | 2.1448270        | 0.4854370  |
| H                            | -1.8818620 | 1.7800210        | -1.1697190 |
| C                            | -2.3261460 | -0.5496520       | -0.5322680 |
| H                            | -2.1402730 | -1.5846420       | -0.2247410 |
| H                            | -2.0675760 | -0.4615920       | -1.5941830 |
| C                            | -0.3447810 | 2.6009590        | -0.0131790 |
| C                            | -0.4491470 | 3.9663840        | 0.2584450  |
| C                            | 1.9378620  | 2.7942280        | -0.3779020 |
| C                            | 0.6937980  | 4.7634320        | 0.1943050  |
| H                            | -1.4214520 | 4.3941950        | 0.5074250  |
| C                            | 1.9090970  | 4.1665310        | -0.1457660 |
| H                            | 2.8697930  | 2.2911760        | -0.6350990 |
| H                            | 0.6351200  | 5.8337400        | 0.4011080  |
| H                            | 2.8283730  | 4.7481170        | -0.2250990 |
| C                            | -3.7770310 | -0.2010020       | -0.2871070 |
| C                            | -4.4684650 | -0.7171970       | 0.8210280  |

|    |            |            |            |
|----|------------|------------|------------|
| C  | -4.4646150 | 0.6498060  | -1.1668630 |
| C  | -5.8020040 | -0.3734050 | 1.0572320  |
| H  | -3.9644170 | -1.4076190 | 1.5009880  |
| C  | -5.7983800 | 0.9959950  | -0.9350790 |
| H  | -3.9523050 | 1.0398720  | -2.0499370 |
| C  | -6.4693180 | 0.4892240  | 0.1819930  |
| H  | -6.3237230 | -0.7864020 | 1.9237700  |
| H  | -6.3165420 | 1.6586800  | -1.6322140 |
| H  | -7.5126230 | 0.7572400  | 0.3644690  |
| N  | 2.7974990  | -0.1507790 | -0.3541310 |
| N  | 0.3919650  | -2.0055210 | -0.4048720 |
| N  | 0.8402620  | 2.0235070  | -0.2974150 |
| Mn | 0.7254100  | -0.0089230 | -0.5168790 |
| O  | 1.0650840  | -0.3024650 | -2.3524740 |
| O  | -0.0998520 | 0.4214470  | -2.1762400 |

64

MnBnTPEN\_Peroxide\_Mn3\_G3.log

64

Final Energy = -2620.3714901800

|   |            |            |            |
|---|------------|------------|------------|
| C | -2.2981100 | -2.0606370 | 0.8600820  |
| C | -2.2337450 | -2.2432450 | -1.4511940 |
| C | -2.9991440 | -3.4071370 | -1.4200890 |
| C | -3.4158990 | -3.9111450 | -0.1882880 |
| C | -3.0645990 | -3.2176670 | 0.9714650  |
| H | -1.8663750 | -1.8170550 | -2.3847290 |
| H | -3.2597400 | -3.9036470 | -2.3556490 |
| H | -4.0158720 | -4.8212100 | -0.1293230 |
| H | -3.3860030 | -3.5592570 | 1.9564100  |
| C | -1.8879930 | -1.2255950 | 2.0369610  |
| H | -0.9120120 | -1.5695210 | 2.4102920  |
| H | -2.6110490 | -1.3181090 | 2.8648880  |
| N | -1.7449190 | 0.1662820  | 1.5711250  |
| C | -1.0937600 | 1.0499410  | 2.5770890  |
| H | -1.8396010 | 1.6922380  | 3.0673540  |
| H | -0.6689170 | 0.4248550  | 3.3716190  |
| C | -0.0259590 | 1.9143780  | 1.9300260  |
| H | -0.4807130 | 2.7215970  | 1.3429140  |
| H | 0.5924530  | 2.3873340  | 2.7138780  |
| N | 0.8103490  | 1.1114830  | 1.0121050  |
| C | -3.0657460 | 0.7224570  | 1.1852050  |
| H | -3.6265010 | 1.0557030  | 2.0720270  |
| H | -3.6598550 | -0.0705310 | 0.7090160  |
| C | -2.8832040 | 1.8257790  | 0.1887460  |
| C | -3.7544100 | 2.9065930  | 0.0601710  |
| C | -3.5263700 | 3.8320590  | -0.9599630 |
| H | -4.5954070 | 3.0126820  | 0.7470020  |
| C | -1.6072800 | 2.5397050  | -1.6124720 |
| C | -2.4364030 | 3.6414190  | -1.8120110 |
| H | -4.1898050 | 4.6900690  | -1.0859390 |
| H | -0.7290780 | 2.3335710  | -2.2257600 |
| H | -2.2219260 | 4.3400380  | -2.6220480 |
| C | 1.5403520  | 0.0607420  | 1.7640000  |
| H | 0.9091330  | -0.2883910 | 2.5896820  |
| H | 2.4572490  | 0.4490020  | 2.2268770  |

|    |            |            |            |
|----|------------|------------|------------|
| C  | 1.7491160  | 2.0507170  | 0.2769570  |
| H  | 1.8961900  | 2.9304430  | 0.9219850  |
| H  | 1.2255080  | 2.3691380  | -0.6310950 |
| C  | 1.8290810  | -1.1115140 | 0.8787220  |
| C  | 2.9777950  | -1.8933230 | 0.9939280  |
| C  | 1.0617460  | -2.3751320 | -0.9034640 |
| C  | 3.1541940  | -2.9625260 | 0.1177890  |
| H  | 3.7300800  | -1.6412110 | 1.7420440  |
| C  | 2.1816150  | -3.2004790 | -0.8564170 |
| H  | 0.2957300  | -2.4974350 | -1.6679470 |
| H  | 4.0470370  | -3.5878000 | 0.1791110  |
| H  | 2.2884070  | -4.0090860 | -1.5808070 |
| C  | 3.1128250  | 1.4910590  | -0.0602070 |
| C  | 3.3400440  | 0.7235840  | -1.2133470 |
| C  | 4.1907370  | 1.7359910  | 0.8068570  |
| C  | 4.6067990  | 0.1980080  | -1.4771440 |
| H  | 2.5001930  | 0.5169750  | -1.8770230 |
| C  | 5.4568010  | 1.2048760  | 0.5482310  |
| H  | 4.0364390  | 2.3486330  | 1.6992560  |
| C  | 5.6669030  | 0.4285000  | -0.5956350 |
| H  | 4.7640840  | -0.4052430 | -2.3745980 |
| H  | 6.2804840  | 1.4016620  | 1.2385160  |
| H  | 6.6553010  | 0.0102340  | -0.8009290 |
| N  | -1.8805240 | -1.5865570 | -0.3334080 |
| N  | -1.8263510 | 1.6566390  | -0.6243040 |
| N  | 0.8776010  | -1.3666920 | -0.0375170 |
| Mn | -0.5950120 | 0.0430570  | -0.2946230 |
| O  | 0.4511970  | 0.5741970  | -1.7840340 |
| O  | -0.6818920 | -0.1297750 | -2.1838980 |

64

MnBnTPEN\_Peroxide\_Mn4\_G2.log

64

Final Energy = -2620.2195639800

|   |            |            |            |
|---|------------|------------|------------|
| C | 3.2551630  | 0.0875040  | 0.9732850  |
| C | 3.5554240  | -0.6235500 | -1.2267470 |
| C | 4.9248390  | -0.7673140 | -1.0291410 |
| C | 5.4661390  | -0.4580230 | 0.2190330  |
| C | 4.6145860  | -0.0332800 | 1.2403150  |
| H | 3.0871570  | -0.8565650 | -2.1819390 |
| H | 5.5494340  | -1.1220600 | -1.8492810 |
| H | 6.5369950  | -0.5613740 | 0.4024070  |
| H | 4.9915870  | 0.1920210  | 2.2381940  |
| C | 2.2288740  | 0.5060120  | 1.9759450  |
| H | 2.0852810  | 1.5947870  | 1.9496870  |
| H | 2.5170950  | 0.2407920  | 3.0040530  |
| N | 0.9526430  | -0.1512240 | 1.5946440  |
| C | -0.1963770 | 0.4985460  | 2.2809010  |
| H | -0.2149420 | 0.2226090  | 3.3462460  |
| H | -0.0585070 | 1.5848140  | 2.2284110  |
| C | -1.4570090 | 0.0645400  | 1.5859260  |
| H | -1.6101640 | -1.0127610 | 1.7236090  |
| H | -2.3369260 | 0.5709910  | 2.0058180  |
| N | -1.3526590 | 0.3219200  | 0.1178100  |
| C | 1.0280930  | -1.6205500 | 1.8980330  |

|    |            |            |            |
|----|------------|------------|------------|
| H  | 0.4457240  | -1.8459960 | 2.8023860  |
| H  | 2.0705090  | -1.8741080 | 2.1388640  |
| C  | 0.6007350  | -2.4928680 | 0.7513980  |
| C  | 0.3887370  | -3.8632510 | 0.9047690  |
| C  | 0.0846080  | -4.6260370 | -0.2216350 |
| H  | 0.4706370  | -4.3187230 | 1.8923570  |
| C  | 0.1933560  | -2.6299070 | -1.5464010 |
| C  | -0.0043060 | -4.0016330 | -1.4699610 |
| H  | -0.0817360 | -5.7006200 | -0.1272660 |
| H  | 0.1042630  | -2.0763580 | -2.4813040 |
| H  | -0.2359710 | -4.5663920 | -2.3731860 |
| C  | -1.6596770 | 1.7408380  | -0.2188140 |
| H  | -2.5015960 | 2.1078110  | 0.3838580  |
| H  | -1.9720570 | 1.7654550  | -1.2709740 |
| C  | -2.3123860 | -0.5912290 | -0.6141680 |
| H  | -2.0286860 | -1.6158260 | -0.3546810 |
| H  | -2.1314440 | -0.4506870 | -1.6837460 |
| C  | -0.4740750 | 2.6525330  | -0.1110400 |
| C  | -0.6111950 | 4.0294060  | 0.0632560  |
| C  | 1.8313270  | 2.8614200  | -0.3861870 |
| C  | 0.5250800  | 4.8347030  | -0.0015610 |
| H  | -1.5996060 | 4.4571120  | 0.2343200  |
| C  | 1.7666650  | 4.2420100  | -0.2456320 |
| H  | 2.7788070  | 2.3563930  | -0.5723320 |
| H  | 0.4422170  | 5.9149920  | 0.1299480  |
| H  | 2.6779350  | 4.8355170  | -0.3212130 |
| C  | -3.7689380 | -0.3630490 | -0.2811640 |
| C  | -4.3807780 | -1.0607280 | 0.7726650  |
| C  | -4.5415160 | 0.5384720  | -1.0305550 |
| C  | -5.7235690 | -0.8417640 | 1.0886020  |
| H  | -3.8085280 | -1.7942900 | 1.3452200  |
| C  | -5.8843610 | 0.7596300  | -0.7165940 |
| H  | -4.0953140 | 1.0654600  | -1.8769320 |
| C  | -6.4767510 | 0.0744460  | 0.3484160  |
| H  | -6.1842760 | -1.3941810 | 1.9104850  |
| H  | -6.4711400 | 1.4635890  | -1.3107700 |
| H  | -7.5274140 | 0.2454100  | 0.5935630  |
| N  | 2.7440820  | -0.1861200 | -0.2479910 |
| N  | 0.4850140  | -1.9033660 | -0.4515970 |
| N  | 0.7341340  | 2.0884800  | -0.2994330 |
| Mn | 0.7068040  | 0.0772340  | -0.4667370 |
| O  | 1.2125410  | 0.2105070  | -2.2170120 |
| O  | -0.1310460 | 0.2835230  | -2.1916250 |

64

MnBnTPEN\_Peroxide\_Mn4\_G3.log

64

Final Energy = -2620.2192983700

|   |            |            |            |
|---|------------|------------|------------|
| C | -3.2194060 | -0.0934440 | 0.9985960  |
| C | -3.5377400 | 0.6221170  | -1.2009100 |
| C | -4.9056180 | 0.7581240  | -0.9930290 |
| C | -5.4371830 | 0.4420210  | 0.2584050  |
| C | -4.5781220 | 0.0194490  | 1.2738360  |
| H | -3.0711900 | 0.8612390  | -2.1554240 |
| H | -5.5377790 | 1.1123670  | -1.8075560 |



|   |            |            |            |
|---|------------|------------|------------|
| H | -6.5074260 | 0.5395930  | 0.4484860  |
| H | -4.9483060 | -0.2095150 | 2.2734130  |
| C | -2.1847810 | -0.5076990 | 1.9952430  |
| H | -2.0393670 | -1.5964580 | 1.9701030  |
| H | -2.4664940 | -0.2409130 | 3.0246620  |
| N | -0.9106090 | 0.1512210  | 1.6034270  |
| C | 0.2438940  | -0.4958590 | 2.2788730  |
| H | 0.2727530  | -0.2195440 | 3.3438100  |
| H | 0.1084130  | -1.5825890 | 2.2281250  |
| C | 1.4924900  | -0.0598510 | 1.5671180  |
| H | 1.6419630  | 1.0195570  | 1.6928930  |
| H | 2.3808670  | -0.5579790 | 1.9792950  |
| N | 1.3658060  | -0.3328150 | 0.1062020  |
| C | -0.9835030 | 1.6214300  | 1.9108770  |
| H | -0.3828560 | 1.8478020  | 2.8027020  |
| H | -2.0221120 | 1.8685550  | 2.1742720  |
| C | -0.5887080 | 2.4981110  | 0.7558550  |
| C | -0.3655430 | 3.8665380  | 0.9101200  |
| C | -0.1101330 | 4.6373690  | -0.2230110 |
| H | -0.4006250 | 4.3140880  | 1.9040740  |
| C | -0.3007350 | 2.6533120  | -1.5576740 |
| C | -0.0890110 | 4.0233700  | -1.4791280 |
| H | 0.0682340  | 5.7099370  | -0.1278880 |
| H | -0.2734610 | 2.1116150  | -2.5030730 |
| H | 0.1000080  | 4.5945150  | -2.3882900 |
| C | 1.6446820  | -1.7628600 | -0.2109660 |
| H | 2.4806660  | -2.1406060 | 0.3935370  |
| H | 1.9558780  | -1.8068400 | -1.2635460 |
| C | 2.3251160  | 0.5601050  | -0.6484980 |
| H | 2.0348000  | 1.5914480  | -0.4205760 |
| H | 2.1509980  | 0.3884900  | -1.7147950 |
| C | 0.4424340  | -2.6551600 | -0.0976220 |
| C | 0.5591480  | -4.0317170 | 0.0901000  |
| C | -1.8581740 | -2.8428750 | -0.4390430 |
| C | -0.5849120 | -4.8249870 | 0.0052250  |
| H | 1.5384020  | -4.4696540 | 0.2860970  |
| C | -1.8125760 | -4.2226350 | -0.2804010 |
| H | -2.7933350 | -2.3284450 | -0.6580260 |
| H | -0.5172450 | -5.9046190 | 0.1502800  |
| H | -2.7274010 | -4.8077410 | -0.3758740 |
| C | 3.7816260  | 0.3441270  | -0.3074860 |
| C | 4.5512130  | -0.5906300 | -1.0182610 |
| C | 4.3954550  | 1.0823560  | 0.7169660  |
| C | 5.8929690  | -0.8039780 | -0.6941670 |
| H | 4.1036830  | -1.1498330 | -1.8429460 |
| C | 5.7373960  | 0.8719870  | 1.0423970  |
| H | 3.8247660  | 1.8397990  | 1.2592320  |
| C | 6.4875080  | -0.0771690 | 0.3416290  |
| H | 6.4773140  | -1.5344500 | -1.2579890 |
| H | 6.1996700  | 1.4561840  | 1.8411200  |
| H | 7.5373780  | -0.2417620 | 0.5944480  |
| N | -2.7196070 | 0.1847860  | -0.2267150 |
| N | -0.5331620 | 1.9173220  | -0.4558320 |
| N | -0.7569340 | -2.0806530 | -0.3211330 |

|    |            |            |            |
|----|------------|------------|------------|
| Mn | -0.6912210 | -0.0749550 | -0.4604210 |
| O  | 0.1024190  | -0.2258810 | -2.1074300 |
| O  | -1.2290250 | -0.2314580 | -2.2990660 |

65

OSS\_MnBnTPEN\_Hydroperoxo\_G1.log

65

Final Energy = -2620.8531867700

|   |            |            |            |
|---|------------|------------|------------|
| C | -3.2632030 | 0.0702690  | -0.8717220 |
| C | -3.4275630 | -0.3704120 | 1.4201570  |
| C | -4.8118280 | -0.4844450 | 1.3359330  |
| C | -5.4272160 | -0.3152400 | 0.0937470  |
| C | -4.6418390 | -0.0389210 | -1.0281030 |
| H | -2.8856480 | -0.4895770 | 2.3598220  |
| H | -5.3917050 | -0.7064720 | 2.2321650  |
| H | -6.5105890 | -0.4048730 | -0.0040410 |
| H | -5.0874280 | 0.0878260  | -2.0153110 |
| C | -2.3076930 | 0.4030690  | -1.9887940 |
| H | -2.1478740 | 1.4900010  | -2.0292890 |
| H | -2.7051090 | 0.0991980  | -2.9684870 |
| N | -1.0098240 | -0.2567280 | -1.6966850 |
| C | 0.1535930  | 0.3579580  | -2.3840540 |
| H | 0.2002340  | 0.0466550  | -3.4394400 |
| H | 0.0289810  | 1.4473570  | -2.3732720 |
| C | 1.4124570  | -0.0649310 | -1.6529960 |
| H | 1.5308530  | -1.1541040 | -1.7190280 |
| H | 2.3012070  | 0.3827280  | -2.1207690 |
| N | 1.3443100  | 0.2927650  | -0.2019440 |
| C | -1.1099870 | -1.7234100 | -1.9722780 |
| H | -0.4839300 | -1.9863690 | -2.8376520 |
| H | -2.1424410 | -1.9592530 | -2.2680310 |
| C | -0.7594620 | -2.5804410 | -0.7882540 |
| C | -0.6630410 | -3.9690270 | -0.8972460 |
| C | -0.4022770 | -4.7197620 | 0.2465100  |
| H | -0.7972540 | -4.4456370 | -1.8693500 |
| C | -0.3448450 | -2.6768760 | 1.5020660  |
| C | -0.2480590 | -4.0613980 | 1.4701980  |
| H | -0.3222860 | -5.8066160 | 0.1857590  |
| H | -0.2188990 | -2.1038460 | 2.4209560  |
| H | -0.0487340 | -4.6102630 | 2.3909740  |
| C | 1.6891280  | 1.7230360  | 0.0195360  |
| H | 2.5139030  | 2.0390210  | -0.6342970 |
| H | 2.0333440  | 1.8193040  | 1.0580830  |
| C | 2.2614470  | -0.5842680 | 0.6109990  |
| H | 1.9543660  | -1.6193720 | 0.4269630  |
| H | 2.0538710  | -0.3476000 | 1.6609550  |
| C | 0.5059090  | 2.6331490  | -0.1026760 |
| C | 0.6429930  | 4.0002360  | -0.3408670 |
| C | -1.7850160 | 2.8680100  | 0.2443580  |
| C | -0.4860830 | 4.8148530  | -0.2756830 |
| H | 1.6276840  | 4.4133050  | -0.5620570 |
| C | -1.7204780 | 4.2400040  | 0.0382120  |
| H | -2.7293300 | 2.3817100  | 0.4857170  |
| H | -0.4033250 | 5.8876610  | -0.4588900 |
| H | -2.6265930 | 4.8408720  | 0.1177740  |

|    |            |            |            |
|----|------------|------------|------------|
| C  | 3.7320770  | -0.4172860 | 0.3080480  |
| C  | 4.3422290  | -1.1548590 | -0.7191740 |
| C  | 4.5164680  | 0.4788180  | 1.0510770  |
| C  | 5.6963440  | -0.9810600 | -1.0146660 |
| H  | 3.7589590  | -1.8839220 | -1.2861250 |
| C  | 5.8710960  | 0.6543870  | 0.7584130  |
| H  | 4.0677900  | 1.0378510  | 1.8757390  |
| C  | 6.4626790  | -0.0710500 | -0.2799880 |
| H  | 6.1557910  | -1.5639090 | -1.8160870 |
| H  | 6.4671540  | 1.3548500  | 1.3476090  |
| H  | 7.5222110  | 0.0640130  | -0.5090270 |
| N  | -2.6824260 | -0.0951580 | 0.3385770  |
| N  | -0.5876950 | -1.9560420 | 0.3898840  |
| N  | -0.6974160 | 2.0793640  | 0.1517960  |
| Mn | -0.6656950 | 0.0698190  | 0.3552600  |
| O  | -0.4677680 | 0.1093590  | 2.1232120  |
| O  | 0.2807280  | 1.2003500  | 2.6717790  |
| H  | 0.5278670  | 0.8344900  | 3.5392920  |

65

OSS\_MnBnTPEN\_Hydroperoxo\_G2.log

65

Final Energy = -2620.8531867700

|   |            |            |            |
|---|------------|------------|------------|
| C | 3.2631880  | 0.0705240  | 0.8716320  |
| C | 3.4276000  | -0.3704420 | -1.4201990 |
| C | 4.8117630  | -0.4855260 | -1.3357280 |
| C | 5.4270690  | -0.3166990 | -0.0934560 |
| C | 4.6417090  | -0.0396910 | 1.0282420  |
| H | 2.8857330  | -0.4892600 | -2.3599360 |
| H | 5.3916250  | -0.7080830 | -2.2318380 |
| H | 6.5103530  | -0.4071900 | 0.0045280  |
| H | 5.0872330  | 0.0868000  | 2.0155130  |
| C | 2.3076320  | 0.4037750  | 1.9885230  |
| H | 2.1476710  | 1.4906970  | 2.0285280  |
| H | 2.7049650  | 0.1003400  | 2.9683790  |
| N | 1.0098140  | -0.2562520 | 1.6965200  |
| C | -0.1536220 | 0.3582990  | 2.3839730  |
| H | -0.2001610 | 0.0469700  | 3.4393510  |
| H | -0.0291360 | 1.4477130  | 2.3732130  |
| C | -1.4124680 | -0.0647390 | 1.6529530  |
| H | -1.5307620 | -1.1539200 | 1.7190680  |
| H | -2.3012900 | 0.3828820  | 2.1206230  |
| N | -1.3442810 | 0.2928170  | 0.2018780  |
| C | 1.1102700  | -1.7229030 | 1.9722590  |
| H | 0.4844670  | -1.9858670 | 2.8378080  |
| H | 2.1428330  | -1.9585630 | 2.2677940  |
| C | 0.7595900  | -2.5801090 | 0.7883980  |
| C | 0.6629510  | -3.9686580 | 0.8976610  |
| C | 0.4020190  | -4.7195870 | -0.2459310 |
| H | 0.7971340  | -4.4450840 | 1.8698600  |
| C | 0.3448520  | -2.6769290 | -1.5018740 |
| C | 0.2478510  | -4.0614290 | -1.4697380 |
| H | 0.3218560  | -5.8064160 | -0.1849640 |
| H | 0.2189200  | -2.1040770 | -2.4208780 |
| H | 0.0483740  | -4.6104220 | -2.3904050 |

|    |            |            |            |
|----|------------|------------|------------|
| C  | -1.6891630 | 1.7230460  | -0.0198420 |
| H  | -2.5142170 | 2.0390210  | 0.6336380  |
| H  | -2.0329780 | 1.8191310  | -1.0585510 |
| C  | -2.2613030 | -0.5843180 | -0.6110280 |
| H  | -1.9541420 | -1.6193910 | -0.4269440 |
| H  | -2.0537420 | -0.3477080 | -1.6610100 |
| C  | -0.5060400 | 2.6332350  | 0.1026710  |
| C  | -0.6431430 | 4.0002200  | 0.3414070  |
| C  | 1.7847900  | 2.8683130  | -0.2448200 |
| C  | 0.4858930  | 4.8149090  | 0.2762670  |
| H  | -1.6278000 | 4.4131650  | 0.5629690  |
| C  | 1.7202310  | 4.2402390  | -0.0381790 |
| H  | 2.7290480  | 2.3821200  | -0.4866180 |
| H  | 0.4031350  | 5.8876430  | 0.4599050  |
| H  | 2.6262870  | 4.8411900  | -0.1177840 |
| C  | -3.7319480 | -0.4175000 | -0.3080590 |
| C  | -4.3419970 | -1.1552140 | 0.7191220  |
| C  | -4.5164460 | 0.4785840  | -1.0509970 |
| C  | -5.6961350 | -0.9816200 | 1.0146240  |
| H  | -3.7586220 | -1.8842290 | 1.2860340  |
| C  | -5.8711000 | 0.6539460  | -0.7583260 |
| H  | -4.0678450 | 1.0377580  | -1.8756030 |
| C  | -6.4625920 | -0.0716600 | 0.2800080  |
| H  | -6.1555050 | -1.5645850 | 1.8160050  |
| H  | -6.4672450 | 1.3543820  | -1.3474650 |
| H  | -7.5221430 | 0.0632400  | 0.5090530  |
| N  | 2.6824830  | -0.0945090 | -0.3387780 |
| N  | 0.5878620  | -1.9558980 | -0.3898570 |
| N  | 0.6972580  | 2.0795940  | -0.1522180 |
| Mn | 0.6656980  | 0.0699870  | -0.3554920 |
| O  | 0.4675970  | 0.1091320  | -2.1233740 |
| O  | -0.2800380 | 1.2007000  | -2.6720910 |
| H  | -0.5276510 | 0.8347690  | -3.5394390 |

65

OSS\_MnBnTPEN\_Hydroperoxo\_G3.log

65

Final Energy = -2620.8432176000

|   |            |            |            |
|---|------------|------------|------------|
| C | -2.9531710 | -1.3648620 | 0.4517600  |
| C | -2.6265380 | -1.0953310 | -1.8481300 |
| C | -3.7942770 | -1.7969650 | -2.1313340 |
| C | -4.5526340 | -2.3016820 | -1.0733250 |
| C | -4.1304610 | -2.0750240 | 0.2386070  |
| H | -1.9881980 | -0.6931640 | -2.6334300 |
| H | -4.0987630 | -1.9401600 | -3.1683640 |
| H | -5.4726920 | -2.8563960 | -1.2658600 |
| H | -4.7092740 | -2.4330620 | 1.0905970  |
| C | -2.3936130 | -1.0351410 | 1.8099970  |
| H | -1.6843720 | -1.8141510 | 2.1255140  |
| H | -3.1855750 | -0.9760180 | 2.5721030  |
| N | -1.6563690 | 0.2455880  | 1.6773630  |
| C | -0.7222410 | 0.5284000  | 2.7956500  |
| H | -1.2467690 | 1.0119930  | 3.6333830  |
| H | -0.3377350 | -0.4287980 | 3.1697550  |
| C | 0.4034440  | 1.4071630  | 2.2855250  |

|    |            |            |            |
|----|------------|------------|------------|
| H  | 0.0184420  | 2.3675260  | 1.9211170  |
| H  | 1.1181720  | 1.6320960  | 3.0932720  |
| N  | 1.1041310  | 0.7217760  | 1.1572790  |
| C  | -2.6178840 | 1.3692250  | 1.4809420  |
| H  | -2.8233940 | 1.8662200  | 2.4399640  |
| H  | -3.5760780 | 0.9552440  | 1.1338230  |
| C  | -2.1497300 | 2.3484630  | 0.4464640  |
| C  | -2.6808270 | 3.6335860  | 0.3430080  |
| C  | -2.2734340 | 4.4491010  | -0.7116770 |
| H  | -3.4079680 | 3.9798000  | 1.0786310  |
| C  | -0.8583600 | 2.6641570  | -1.4633020 |
| C  | -1.3517990 | 3.9517370  | -1.6360120 |
| H  | -2.6733740 | 5.4596250  | -0.8129190 |
| H  | -0.1396690 | 2.2221280  | -2.1538120 |
| H  | -1.0115510 | 4.5511220  | -2.4807950 |
| C  | 1.8759800  | -0.4360260 | 1.6996070  |
| H  | 1.6788670  | -0.5410140 | 2.7761190  |
| H  | 2.9530550  | -0.2528480 | 1.6164150  |
| C  | 1.9964960  | 1.7322760  | 0.4497990  |
| H  | 2.2526170  | 2.5079660  | 1.1853610  |
| H  | 1.3886820  | 2.2122840  | -0.3247910 |
| C  | 1.5283390  | -1.7291180 | 1.0301970  |
| C  | 2.3398940  | -2.8551680 | 1.1813400  |
| C  | -0.0026070 | -2.9416860 | -0.2318270 |
| C  | 1.9398520  | -4.0615100 | 0.6147790  |
| H  | 3.2717310  | -2.7733160 | 1.7421540  |
| C  | 0.7396520  | -4.1057570 | -0.0999950 |
| H  | -0.9223370 | -2.9345570 | -0.8110500 |
| H  | 2.5568110  | -4.9553070 | 0.7240230  |
| H  | 0.3857940  | -5.0256360 | -0.5659350 |
| C  | 3.2819590  | 1.1932740  | -0.1294360 |
| C  | 3.3083030  | 0.2504180  | -1.1701960 |
| C  | 4.5003480  | 1.6507660  | 0.3970910  |
| C  | 4.5261010  | -0.2253730 | -1.6609080 |
| H  | 2.3801570  | -0.1251750 | -1.5929040 |
| C  | 5.7191580  | 1.1831670  | -0.1025100 |
| H  | 4.4940970  | 2.3798590  | 1.2112340  |
| C  | 5.7347470  | 0.2394230  | -1.1324430 |
| H  | 4.5286780  | -0.9642530 | -2.4656920 |
| H  | 6.6562760  | 1.5540900  | 0.3186500  |
| H  | 6.6848010  | -0.1337360 | -1.5217920 |
| N  | -2.2170330 | -0.8999730 | -0.5837290 |
| N  | -1.2414870 | 1.8861760  | -0.4333380 |
| N  | 0.3769370  | -1.7751500 | 0.3295190  |
| Mn | -0.4921490 | 0.0235460  | -0.0689360 |
| O  | 0.1927070  | 0.0864890  | -1.7173070 |
| O  | 0.4731060  | -1.1311210 | -2.4110070 |
| H  | 0.6033500  | -0.7979550 | -3.3165300 |

63

OSS\_MnBnTPEN\_Oxo\_G1.log

63

Final Energy = -2544.8819056900

|   |           |            |            |
|---|-----------|------------|------------|
| C | 3.0150020 | 0.4298970  | -0.3424300 |
| C | 2.0569400 | -0.3976030 | -2.3238000 |

|   |            |            |            |
|---|------------|------------|------------|
| C | 3.2988830  | -0.4396080 | -2.9448280 |
| C | 4.4282550  | -0.0388740 | -2.2288550 |
| C | 4.2833740  | 0.3979090  | -0.9105470 |
| H | 1.1471320  | -0.6959090 | -2.8442240 |
| H | 3.3684100  | -0.7863200 | -3.9759460 |
| H | 5.4164380  | -0.0695730 | -2.6906410 |
| H | 5.1431990  | 0.7114760  | -0.3183320 |
| C | 2.7309470  | 0.9336200  | 1.0444210  |
| H | 2.4927600  | 2.0059690  | 1.0105930  |
| H | 3.6048140  | 0.8241950  | 1.7019980  |
| N | 1.5563040  | 0.1949450  | 1.5647500  |
| C | 0.8134770  | 0.9025290  | 2.6389460  |
| H | 1.3325250  | 0.8125160  | 3.6052890  |
| H | 0.7668210  | 1.9712760  | 2.4008840  |
| C | -0.5583890 | 0.2727140  | 2.7153150  |
| H | -0.4848020 | -0.7891580 | 2.9833360  |
| H | -1.1783930 | 0.7577130  | 3.4817960  |
| N | -1.2545160 | 0.3542100  | 1.3844630  |
| C | 1.9666180  | -1.1657390 | 2.0243410  |
| H | 1.8087700  | -1.2642420 | 3.1074920  |
| H | 3.0485110  | -1.2878430 | 1.8702410  |
| C | 1.2760890  | -2.2619000 | 1.2790570  |
| C | 1.4990480  | -3.6045940 | 1.5890140  |
| C | 0.9621190  | -4.5911180 | 0.7685590  |
| H | 2.1104580  | -3.8585880 | 2.4556370  |
| C | 0.0331610  | -2.8590340 | -0.6019750 |
| C | 0.2376030  | -4.2077190 | -0.3643060 |
| H | 1.1266160  | -5.6461510 | 0.9933200  |
| H | -0.5098700 | -2.5172360 | -1.4800230 |
| H | -0.1690860 | -4.9405780 | -1.0612530 |
| C | -1.7902780 | 1.7292320  | 1.1669220  |
| H | -2.2135520 | 2.1281470  | 2.0992450  |
| H | -2.6076330 | 1.6651600  | 0.4374100  |
| C | -2.3914080 | -0.6619720 | 1.4014010  |
| H | -2.9781690 | -0.4393050 | 2.3064760  |
| H | -1.9243360 | -1.6432470 | 1.5364090  |
| C | -0.7867450 | 2.6501870  | 0.5619210  |
| C | -0.8896590 | 4.0351490  | 0.6559020  |
| C | 0.9697460  | 2.8286720  | -0.9720470 |
| C | -0.0262660 | 4.8284270  | -0.0970080 |
| H | -1.6499710 | 4.4751720  | 1.3012470  |
| C | 0.9034250  | 4.2128600  | -0.9400310 |
| H | 1.6831390  | 2.3210590  | -1.6158290 |
| H | -0.0865200 | 5.9163290  | -0.0374710 |
| H | 1.5795310  | 4.7932240  | -1.5675150 |
| C | -3.2932480 | -0.6526830 | 0.2035050  |
| C | -4.3685350 | 0.2455280  | 0.0976580  |
| C | -3.0981600 | -1.5979310 | -0.8367170 |
| C | -5.1638050 | 0.2558870  | -1.0456260 |
| H | -4.5962060 | 0.9319220  | 0.9149150  |
| C | -3.8914000 | -1.5826620 | -1.9883040 |
| H | -2.3662300 | -2.3896900 | -0.7006120 |
| C | -4.9143760 | -0.6477750 | -2.1014960 |
| H | -5.9918990 | 0.9627340  | -1.1221800 |

|    |            |            |            |
|----|------------|------------|------------|
| H  | -3.7181560 | -2.3177220 | -2.7755910 |
| H  | -5.5475800 | -0.6282010 | -2.9904210 |
| N  | 1.9303840  | 0.0307170  | -1.0521000 |
| N  | 0.5069340  | -1.9059830 | 0.2336910  |
| N  | 0.1566500  | 2.0651400  | -0.2092550 |
| Mn | 0.1611240  | 0.0628850  | -0.1206710 |
| O  | -0.8399530 | -0.2286060 | -1.2692870 |

63

OSS\_MnBnTPEN\_Oxo\_G2.log

63

Final Energy = -2544.8819053700

|   |            |            |            |
|---|------------|------------|------------|
| C | 3.0148680  | 0.4304000  | -0.3423740 |
| C | 2.0569710  | -0.3972770 | -2.3237350 |
| C | 3.2989410  | -0.4392000 | -2.9447240 |
| C | 4.4282450  | -0.0382930 | -2.2287340 |
| C | 4.2832710  | 0.3985480  | -0.9104510 |
| H | 1.1472070  | -0.6957060 | -2.8441760 |
| H | 3.3685360  | -0.7859720 | -3.9758170 |
| H | 5.4164450  | -0.0688940 | -2.6904910 |
| H | 5.1430460  | 0.7122640  | -0.3182420 |
| C | 2.7307530  | 0.9342430  | 1.0444100  |
| H | 2.4924190  | 2.0065580  | 1.0104390  |
| H | 3.6046620  | 0.8250340  | 1.7019700  |
| N | 1.5562100  | 0.1954940  | 1.5648460  |
| C | 0.8131800  | 0.9032040  | 2.6388250  |
| H | 1.3322160  | 0.8135880  | 3.6052090  |
| H | 0.7662740  | 1.9718650  | 2.4004470  |
| C | -0.5585510 | 0.2730880  | 2.7153560  |
| H | -0.4847170 | -0.7887020 | 2.9836230  |
| H | -1.1786910 | 0.7581090  | 3.4817130  |
| N | -1.2546880 | 0.3540920  | 1.3844930  |
| C | 1.9666180  | -1.1650790 | 2.0247420  |
| H | 1.8084070  | -1.2634940 | 3.1078420  |
| H | 3.0485910  | -1.2870180 | 1.8710500  |
| C | 1.2765490  | -2.2614700 | 1.2793430  |
| C | 1.4998280  | -3.6041090 | 1.5892870  |
| C | 0.9634240  | -4.5907520 | 0.7686330  |
| H | 2.1111090  | -3.8579500 | 2.4560490  |
| C | 0.0343180  | -2.8588660 | -0.6020660 |
| C | 0.2391310  | -4.2075060 | -0.3644280 |
| H | 1.1281850  | -5.6457440 | 0.9933940  |
| H | -0.5085980 | -2.5172280 | -1.4802470 |
| H | -0.1671000 | -4.9404380 | -1.0615640 |
| C | -1.7909350 | 1.7288840  | 1.1667480  |
| H | -2.2143010 | 2.1277990  | 2.0990330  |
| H | -2.6083090 | 1.6644230  | 0.4372920  |
| C | -2.3912210 | -0.6624440 | 1.4016000  |
| H | -2.9780950 | -0.4398010 | 2.3066090  |
| H | -1.9238370 | -1.6435500 | 1.5367810  |
| C | -0.7877150 | 2.6501100  | 0.5616220  |
| C | -0.8912340 | 4.0350480  | 0.6552740  |
| C | 0.9690430  | 2.8290000  | -0.9719920 |
| C | -0.0280090 | 4.8285260  | -0.0976130 |
| H | -1.6518880 | 4.4749000  | 1.3003340  |

|    |            |            |            |
|----|------------|------------|------------|
| C  | 0.9021560  | 4.2131670  | -0.9402590 |
| H  | 1.6827790  | 2.3215720  | -1.6155320 |
| H  | -0.0887470 | 5.9164160  | -0.0383360 |
| H  | 1.5781820  | 4.7936820  | -1.5676890 |
| C  | -3.2930010 | -0.6536300 | 0.2036320  |
| C  | -3.0973040 | -1.5987940 | -0.8365680 |
| C  | -4.3686330 | 0.2440900  | 0.0976050  |
| C  | -3.8903650 | -1.5838800 | -1.9883180 |
| H  | -2.3651250 | -2.3902890 | -0.7002690 |
| C  | -5.1637170 | 0.2540930  | -1.0458300 |
| H  | -4.5966920 | 0.9304140  | 0.9148140  |
| C  | -4.9137150 | -0.6494580 | -2.1016720 |
| H  | -3.7166410 | -2.3188750 | -2.7755620 |
| H  | -5.9920950 | 0.9605890  | -1.1225520 |
| H  | -5.5467940 | -0.6301050 | -2.9906880 |
| N  | 1.9303430  | 0.0310740  | -1.0520750 |
| N  | 0.5075400  | -1.9057280 | 0.2338210  |
| N  | 0.1560770  | 2.0652760  | -0.2092350 |
| Mn | 0.1610730  | 0.0630220  | -0.1205680 |
| O  | -0.8398770 | -0.2287890 | -1.2692570 |

63

OSS\_MnBnTPEN\_Oxo\_G3.log

63

Final Energy = -2544.8827567900

|   |            |            |            |
|---|------------|------------|------------|
| C | 3.2153230  | 0.0519260  | 0.7907190  |
| C | 3.3560140  | -0.6049140 | -1.4666900 |
| C | 4.7314860  | -0.7640840 | -1.3633480 |
| C | 5.3582110  | -0.5000700 | -0.1443700 |
| C | 4.5880680  | -0.0947290 | 0.9476000  |
| H | 2.8299370  | -0.7973770 | -2.4006480 |
| H | 5.2943080  | -1.0920120 | -2.2374590 |
| H | 6.4376290  | -0.6200580 | -0.0394800 |
| H | 5.0381140  | 0.0994700  | 1.9214310  |
| C | 2.2773900  | 0.4811500  | 1.8788160  |
| H | 2.1679540  | 1.5738480  | 1.8879510  |
| H | 2.6481640  | 0.1909240  | 2.8718370  |
| N | 0.9647480  | -0.1445170 | 1.5847300  |
| C | -0.1812950 | 0.5383390  | 2.2372960  |
| H | -0.2465350 | 0.2702160  | 3.3023620  |
| H | -0.0270580 | 1.6221330  | 2.1872310  |
| C | -1.4287200 | 0.1097910  | 1.5064980  |
| H | -1.5928840 | -0.9676230 | 1.6225150  |
| H | -2.3174750 | 0.6203540  | 1.8977780  |
| N | -1.2990530 | 0.3863210  | 0.0347520  |
| C | 1.0169600  | -1.5947060 | 1.9439930  |
| H | 0.4322420  | -1.7819650 | 2.8557600  |
| H | 2.0533700  | -1.8653490 | 2.1923340  |
| C | 0.5723450  | -2.4820870 | 0.8262160  |
| C | 0.3603250  | -3.8478280 | 1.0136710  |
| C | 0.0487000  | -4.6449990 | -0.0839580 |
| H | 0.4522260  | -4.2708280 | 2.0144590  |
| C | 0.1594570  | -2.6911860 | -1.4700460 |
| C | -0.0418670 | -4.0558380 | -1.3485900 |
| H | -0.1181800 | -5.7157950 | 0.0429890  |



|    |            |            |            |
|----|------------|------------|------------|
| H  | 0.0792540  | -2.1910400 | -2.4344680 |
| H  | -0.2757360 | -4.6406670 | -2.2382470 |
| C  | -1.5594980 | 1.8255030  | -0.2767930 |
| H  | -2.3972940 | 2.1996310  | 0.3246430  |
| H  | -1.8576980 | 1.8923680  | -1.3333420 |
| C  | -2.2669000 | -0.4992320 | -0.7544740 |
| H  | -1.9963410 | -1.5330810 | -0.5262780 |
| H  | -2.0654710 | -0.3076870 | -1.8153810 |
| C  | -0.3377270 | 2.6683080  | -0.1169850 |
| C  | -0.3932800 | 4.0424020  | 0.0891580  |
| C  | 1.9881010  | 2.7506490  | -0.4026280 |
| C  | 0.7889300  | 4.7807910  | 0.0420410  |
| H  | -1.3562720 | 4.5204610  | 0.2692750  |
| C  | 1.9936480  | 4.1259410  | -0.2284770 |
| H  | 2.9081440  | 2.2106280  | -0.6123650 |
| H  | 0.7688550  | 5.8598180  | 0.2031110  |
| H  | 2.9365570  | 4.6676260  | -0.3007640 |
| C  | -3.7121030 | -0.2532170 | -0.4178730 |
| C  | -4.3424410 | -1.0022340 | 0.5908460  |
| C  | -4.4580800 | 0.7085380  | -1.1210340 |
| C  | -5.6823200 | -0.7775700 | 0.9064770  |
| H  | -3.7882560 | -1.7786210 | 1.1226260  |
| C  | -5.7985690 | 0.9320200  | -0.8063970 |
| H  | -3.9973100 | 1.2729960  | -1.9343130 |
| C  | -6.4107360 | 0.1951450  | 0.2131030  |
| H  | -6.1618130 | -1.3685120 | 1.6893180  |
| H  | -6.3693790 | 1.6771010  | -1.3640650 |
| H  | -7.4601210 | 0.3707260  | 0.4594530  |
| N  | 2.6274050  | -0.1918760 | -0.4075600 |
| N  | 0.4504340  | -1.9227790 | -0.3928320 |
| N  | 0.8434810  | 2.0385280  | -0.3194970 |
| Mn | 0.6607220  | 0.0730190  | -0.5774050 |
| O  | 0.4131730  | 0.0637800  | -2.0748660 |

64

OSS\_MnBnTPEN\_Peroxide\_Mn3\_G1.log

64

|                |            |                  |            |
|----------------|------------|------------------|------------|
| Final Energy = |            | -2620.3804956900 |            |
| C              | 3.3291550  | -0.0053270       | 0.8788960  |
| C              | 3.6136230  | -0.4242400       | -1.3856390 |
| C              | 4.9895970  | -0.5724820       | -1.2253670 |
| C              | 5.5425730  | -0.4331800       | 0.0480660  |
| C              | 4.6942180  | -0.1453970       | 1.1187630  |
| H              | 3.1290500  | -0.4995020       | -2.3589790 |
| H              | 5.6117800  | -0.7946260       | -2.0933950 |
| H              | 6.6162280  | -0.5493180       | 0.2078640  |
| H              | 5.0793580  | -0.0300030       | 2.1327450  |
| C              | 2.3364920  | 0.3537430        | 1.9445270  |
| H              | 2.2026850  | 1.4450220        | 1.9619820  |
| H              | 2.6859410  | 0.0552440        | 2.9463280  |
| N              | 1.0407370  | -0.2660810       | 1.6041290  |
| C              | -0.0746270 | 0.4032720        | 2.3112870  |
| H              | -0.0886160 | 0.1235360        | 3.3783330  |
| H              | 0.0932230  | 1.4863880        | 2.2639760  |
| C              | -1.3820650 | 0.0314960        | 1.6519530  |

|    |            |            |            |
|----|------------|------------|------------|
| H  | -1.5694510 | -1.0420170 | 1.7855120  |
| H  | -2.2178800 | 0.5643390  | 2.1330440  |
| N  | -1.3332950 | 0.3033610  | 0.1963170  |
| C  | 1.0890900  | -1.7262860 | 1.8919990  |
| H  | 0.6478910  | -1.9425860 | 2.8774050  |
| H  | 2.1455960  | -2.0279340 | 1.9564220  |
| C  | 0.4597430  | -2.5663540 | 0.8151890  |
| C  | 0.0492930  | -3.8807790 | 1.0435560  |
| C  | -0.4177880 | -4.6376440 | -0.0317130 |
| H  | 0.1046920  | -4.3005840 | 2.0491190  |
| C  | -0.0459750 | -2.7335560 | -1.4463110 |
| C  | -0.4551340 | -4.0557120 | -1.3013390 |
| H  | -0.7460300 | -5.6678300 | 0.1198890  |
| H  | -0.0525610 | -2.2062570 | -2.4006710 |
| H  | -0.8081960 | -4.6127490 | -2.1702720 |
| C  | -1.5680360 | 1.7310710  | -0.1181510 |
| H  | -2.3910560 | 2.1446600  | 0.4850370  |
| H  | -1.8820890 | 1.7796750  | -1.1700470 |
| C  | -2.3260370 | -0.5500310 | -0.5321040 |
| H  | -2.1399510 | -1.5849000 | -0.2242930 |
| H  | -2.0674990 | -0.4622320 | -1.5940390 |
| C  | -0.3452420 | 2.6010870  | -0.0134890 |
| C  | -0.4498030 | 3.9665060  | 0.2580840  |
| C  | 1.9373930  | 2.7946250  | -0.3781060 |
| C  | 0.6930510  | 4.7636890  | 0.1940120  |
| H  | -1.4221840 | 4.3941940  | 0.5069760  |
| C  | 1.9084460  | 4.1669220  | -0.1459650 |
| H  | 2.8693850  | 2.2916780  | -0.6352830 |
| H  | 0.6342260  | 5.8339940  | 0.4007880  |
| H  | 2.8276730  | 4.7485980  | -0.2252110 |
| C  | -3.7769650 | -0.2015720 | -0.2869520 |
| C  | -4.4683050 | -0.7178920 | 0.8211790  |
| C  | -4.4646970 | 0.6491370  | -1.1666920 |
| C  | -5.8019120 | -0.3743610 | 1.0573860  |
| H  | -3.9640980 | -1.4081940 | 1.5011460  |
| C  | -5.7985270 | 0.9950720  | -0.9349050 |
| H  | -3.9524850 | 1.0393280  | -2.0497650 |
| C  | -6.4693840 | 0.4881480  | 0.1821510  |
| H  | -6.3235560 | -0.7874650 | 1.9239180  |
| H  | -6.3167940 | 1.6576820  | -1.6320320 |
| H  | -7.5127430 | 0.7559570  | 0.3646230  |
| N  | 2.7975390  | -0.1502700 | -0.3539290 |
| N  | 0.3923490  | -2.0052120 | -0.4050140 |
| N  | 0.8398750  | 2.0237720  | -0.2976730 |
| Mn | 0.7254120  | -0.0086530 | -0.5168200 |
| O  | 1.0654540  | -0.3018760 | -2.3524380 |
| O  | -0.1001220 | 0.4210650  | -2.1762250 |

64

OSS\_MnBnTPEN\_Peroxide\_Mn3\_G2.log

64

Final Energy = -2620.3804957400

|   |           |            |            |
|---|-----------|------------|------------|
| C | 3.3291610 | -0.0055120 | 0.8786200  |
| C | 3.6136420 | -0.4245380 | -1.3858760 |
| C | 4.9896570 | -0.5722520 | -1.2256890 |

|   |            |            |            |
|---|------------|------------|------------|
| C | 5.5426980  | -0.4326050 | 0.0476970  |
| C | 4.6943120  | -0.1450410 | 1.1184100  |
| H | 3.1289710  | -0.5000360 | -2.3591550 |
| H | 5.6118580  | -0.7942290 | -2.0937480 |
| H | 6.6164130  | -0.5483160 | 0.2073910  |
| H | 5.0794380  | -0.0293790 | 2.1323670  |
| C | 2.3365760  | 0.3533640  | 1.9444140  |
| H | 2.2027780  | 1.4446420  | 1.9621060  |
| H | 2.6861930  | 0.0546920  | 2.9461040  |
| N | 1.0407930  | -0.2664280 | 1.6041160  |
| C | -0.0745630 | 0.4028390  | 2.3113750  |
| H | -0.0886430 | 0.1228490  | 3.3783530  |
| H | 0.0933550  | 1.4859540  | 2.2643100  |
| C | -1.3820240 | 0.0312830  | 1.6519430  |
| H | -1.5695040 | -1.0422300 | 1.7853500  |
| H | -2.2177580 | 0.5641440  | 2.1331620  |
| N | -1.3332830 | 0.3033780  | 0.1963510  |
| C | 1.0892290  | -1.7266500 | 1.8919230  |
| H | 0.6484450  | -1.9429570 | 2.8775140  |
| H | 2.1457660  | -2.0282900 | 1.9558710  |
| C | 0.4594430  | -2.5666350 | 0.8153210  |
| C | 0.0486910  | -3.8809520 | 1.0437780  |
| C | -0.4187980 | -4.6376880 | -0.0314010 |
| H | 0.1041600  | -4.3007700 | 2.0493300  |
| C | -0.0467410 | -2.7337320 | -1.4460930 |
| C | -0.4562330 | -4.0557810 | -1.3010320 |
| H | -0.7472770 | -5.6677890 | 0.1202810  |
| H | -0.0532810 | -2.2064070 | -2.4004440 |
| H | -0.8096030 | -4.6127530 | -2.1698800 |
| C | -1.5677390 | 1.7311650  | -0.1178580 |
| H | -2.3906520 | 2.1448270  | 0.4854370  |
| H | -1.8818620 | 1.7800210  | -1.1697190 |
| C | -2.3261460 | -0.5496520 | -0.5322680 |
| H | -2.1402730 | -1.5846420 | -0.2247410 |
| H | -2.0675760 | -0.4615920 | -1.5941830 |
| C | -0.3447810 | 2.6009590  | -0.0131790 |
| C | -0.4491470 | 3.9663840  | 0.2584450  |
| C | 1.9378620  | 2.7942280  | -0.3779020 |
| C | 0.6937980  | 4.7634320  | 0.1943050  |
| H | -1.4214520 | 4.3941950  | 0.5074250  |
| C | 1.9090970  | 4.1665310  | -0.1457660 |
| H | 2.8697930  | 2.2911760  | -0.6350990 |
| H | 0.6351200  | 5.8337400  | 0.4011080  |
| H | 2.8283730  | 4.7481170  | -0.2250990 |
| C | -3.7770310 | -0.2010020 | -0.2871070 |
| C | -4.4684650 | -0.7171970 | 0.8210280  |
| C | -4.4646150 | 0.6498060  | -1.1668630 |
| C | -5.8020040 | -0.3734050 | 1.0572320  |
| H | -3.9644170 | -1.4076190 | 1.5009880  |
| C | -5.7983800 | 0.9959950  | -0.9350790 |
| H | -3.9523050 | 1.0398720  | -2.0499370 |
| C | -6.4693180 | 0.4892240  | 0.1819930  |
| H | -6.3237230 | -0.7864020 | 1.9237700  |
| H | -6.3165420 | 1.6586800  | -1.6322140 |

|    |            |            |            |
|----|------------|------------|------------|
| H  | -7.5126230 | 0.7572400  | 0.3644690  |
| N  | 2.7974990  | -0.1507790 | -0.3541310 |
| N  | 0.3919650  | -2.0055210 | -0.4048720 |
| N  | 0.8402620  | 2.0235070  | -0.2974150 |
| Mn | 0.7254100  | -0.0089230 | -0.5168790 |
| O  | 1.0650840  | -0.3024650 | -2.3524740 |
| O  | -0.0998520 | 0.4214470  | -2.1762400 |

64

OSS\_MnBnTPEN\_Peroxide\_Mn3\_G3.log

64

Final Energy = -2620.3714901600

|   |            |            |            |
|---|------------|------------|------------|
| C | 2.2980010  | 2.0606730  | 0.8600970  |
| C | 2.2335990  | 2.2433690  | -1.4511760 |
| C | 2.9989020  | 3.4073210  | -1.4200300 |
| C | 3.4156440  | 3.9113010  | -0.1882060 |
| C | 3.0644230  | 3.2177370  | 0.9715230  |
| H | 1.8662530  | 1.8171960  | -2.3847300 |
| H | 3.2594230  | 3.9039080  | -2.3555700 |
| H | 4.0155360  | 4.8214180  | -0.1292010 |
| H | 3.3858080  | 3.5593220  | 1.9564760  |
| C | 1.8879350  | 1.2255840  | 2.0369570  |
| H | 0.9119650  | 1.5694580  | 2.4103530  |
| H | 2.6110390  | 1.3180890  | 2.8648380  |
| N | 1.7449150  | -0.1662940 | 1.5711030  |
| C | 1.0938220  | -1.0499430 | 2.5771460  |
| H | 1.8396740  | -1.6922540 | 3.0673760  |
| H | 0.6690900  | -0.4248010 | 3.3716840  |
| C | 0.0259570  | -1.9143680 | 1.9301530  |
| H | 0.4806640  | -2.7216300 | 1.3430610  |
| H | -0.5924520 | -2.3872560 | 2.7140540  |
| N | -0.8103000 | -1.1114940 | 1.0121970  |
| C | 3.0657660  | -0.7224000 | 1.1852120  |
| H | 3.6265300  | -1.0556220 | 2.0720400  |
| H | 3.6598520  | 0.0706180  | 0.7090430  |
| C | 2.8832730  | -1.8257320 | 0.1887470  |
| C | 3.7545560  | -2.9064870 | 0.0601710  |
| C | 3.5266000  | -3.8319480 | -0.9599820 |
| H | 4.5955450  | -3.0125270 | 0.7470200  |
| C | 1.6074470  | -2.5396930 | -1.6125320 |
| C | 2.4366430  | -3.6413530 | -1.8120560 |
| H | 4.1900920  | -4.6899140 | -1.0859590 |
| H | 0.7292480  | -2.3336140 | -2.2258370 |
| H | 2.2222380  | -4.3399680 | -2.6221150 |
| C | -1.5403730 | -0.0607430 | 1.7639850  |
| H | -0.9092220 | 0.2884560  | 2.5896890  |
| H | -2.4573030 | -0.4489940 | 2.2268140  |
| C | -1.7490360 | -2.0507450 | 0.2770430  |
| H | -1.8960880 | -2.9304750 | 0.9220700  |
| H | -1.2253960 | -2.3691560 | -0.6310000 |
| C | -1.8291190 | 1.1114530  | 0.8786170  |
| C | -2.9778550 | 1.8932380  | 0.9937900  |
| C | -1.0617750 | 2.3750710  | -0.9035610 |
| C | -3.1542620 | 2.9624230  | 0.1176330  |
| H | -3.7301480 | 1.6411380  | 1.7418990  |

|    |            |            |            |
|----|------------|------------|------------|
| C  | -2.1816600 | 3.2003960  | -0.8565480 |
| H  | -0.2957450 | 2.4973700  | -1.6680350 |
| H  | -4.0471230 | 3.5876760  | 0.1789230  |
| H  | -2.2884560 | 4.0090020  | -1.5809370 |
| C  | -3.1127700 | -1.4911250 | -0.0601090 |
| C  | -3.3399940 | -0.7235410 | -1.2131820 |
| C  | -4.1906850 | -1.7361740 | 0.8069130  |
| C  | -4.6067680 | -0.1980250 | -1.4769690 |
| H  | -2.5001090 | -0.5168040 | -1.8767830 |
| C  | -5.4567800 | -1.2051130 | 0.5482960  |
| H  | -4.0363650 | -2.3488610 | 1.6992760  |
| C  | -5.6668920 | -0.4286650 | -0.5955110 |
| H  | -4.7640660 | 0.4053110  | -2.3743630 |
| H  | -6.2804710 | -1.4020000 | 1.2385420  |
| H  | -6.6553120 | -0.0104470 | -0.8008020 |
| N  | 1.8804400  | 1.5866140  | -0.3334130 |
| N  | 1.8264210  | -1.6566260 | -0.6243330 |
| N  | -0.8776450 | 1.3666390  | -0.0376110 |
| Mn | 0.5949980  | -0.0430760 | -0.2946860 |
| O  | -0.4511760 | -0.5741830 | -1.7841520 |
| O  | 0.6819200  | 0.1298480  | -2.1839480 |

65

Quitnet\_MnBnTPEN\_Hydroperoxo\_G1.log

65

Final Energy = -2620.8816465200

|   |            |            |            |
|---|------------|------------|------------|
| C | -3.4097700 | -0.0823610 | -0.9868020 |
| C | -3.8508950 | -0.4614210 | 1.2708400  |
| C | -5.2102500 | -0.6307010 | 1.0203140  |
| C | -5.6650620 | -0.5191780 | -0.2957630 |
| C | -4.7530970 | -0.2446210 | -1.3182510 |
| H | -3.4328420 | -0.5342330 | 2.2779160  |
| H | -5.8941670 | -0.8478570 | 1.8413320  |
| H | -6.7235840 | -0.6512050 | -0.5277630 |
| H | -5.0767900 | -0.1604910 | -2.3564100 |
| C | -2.3398850 | 0.2685450  | -1.9900320 |
| H | -2.2192050 | 1.3607330  | -2.0278100 |
| H | -2.6139650 | -0.0593030 | -3.0042890 |
| N | -1.0418410 | -0.3281710 | -1.5772290 |
| C | 0.1007420  | 0.3231050  | -2.2765190 |
| H | 0.1307980  | -0.0006690 | -3.3288950 |
| H | -0.0791330 | 1.4048630  | -2.2785490 |
| C | 1.4161360  | -0.0080250 | -1.5964260 |
| H | 1.6018500  | -1.0883750 | -1.6581380 |
| H | 2.2381540  | 0.4836730  | -2.1415730 |
| N | 1.4146460  | 0.3691380  | -0.1648510 |
| C | -1.0760130 | -1.8055750 | -1.8163000 |
| H | -0.6150960 | -2.0414300 | -2.7866260 |
| H | -2.1296040 | -2.1145890 | -1.8907140 |
| C | -0.4633480 | -2.6151470 | -0.7087970 |
| C | -0.0400630 | -3.9305780 | -0.8963140 |
| C | 0.3932490  | -4.6632480 | 0.2089240  |
| H | -0.0609350 | -4.3712800 | -1.8935770 |
| C | -0.0232230 | -2.7450500 | 1.5842470  |
| C | 0.3903050  | -4.0664720 | 1.4730140  |

|    |            |            |            |
|----|------------|------------|------------|
| H  | 0.7281170  | -5.6947130 | 0.0848720  |
| H  | -0.0337230 | -2.2128330 | 2.5364500  |
| H  | 0.7133160  | -4.6108600 | 2.3605650  |
| C  | 1.6331700  | 1.8102240  | 0.0504050  |
| H  | 2.4140880  | 2.2076930  | -0.6166340 |
| H  | 1.9972170  | 1.9397590  | 1.0800510  |
| C  | 2.3978550  | -0.4401230 | 0.6163950  |
| H  | 2.1407890  | -1.4952450 | 0.4668430  |
| H  | 2.2298360  | -0.2011590 | 1.6737040  |
| C  | 0.3891800  | 2.6559270  | -0.0476470 |
| C  | 0.4696440  | 4.0197730  | -0.3365870 |
| C  | -1.9081760 | 2.8311220  | 0.3258890  |
| C  | -0.6847380 | 4.7979690  | -0.2795200 |
| H  | 1.4338430  | 4.4592990  | -0.5950790 |
| C  | -1.8966640 | 4.1955360  | 0.0699630  |
| H  | -2.8297420 | 2.3124750  | 0.5922040  |
| H  | -0.6399520 | 5.8656880  | -0.5020170 |
| H  | -2.8219830 | 4.7679710  | 0.1372210  |
| C  | 3.8476760  | -0.2113790 | 0.2510090  |
| C  | 4.4506420  | -0.9494140 | -0.7799300 |
| C  | 4.6128860  | 0.7527490  | 0.9252260  |
| C  | 5.7786630  | -0.7135730 | -1.1438890 |
| H  | 3.8820690  | -1.7264500 | -1.2963610 |
| C  | 5.9414600  | 0.9906700  | 0.5641320  |
| H  | 4.1705020  | 1.3172020  | 1.7496390  |
| C  | 6.5258650  | 0.2613080  | -0.4756360 |
| H  | 6.2332120  | -1.2980810 | -1.9470100 |
| H  | 6.5233140  | 1.7433130  | 1.1010090  |
| H  | 7.5651360  | 0.4448530  | -0.7577910 |
| N  | -2.9832250 | -0.1924170 | 0.2853530  |
| N  | -0.4295460 | -2.0428240 | 0.5111400  |
| N  | -0.7913090 | 2.0823970  | 0.2527930  |
| Mn | -0.8008210 | -0.0031630 | 0.5310020  |
| O  | -0.8119760 | 0.0798320  | 2.3556550  |
| O  | 0.2040190  | 0.9645100  | 2.8185600  |
| H  | 0.7138340  | 0.3883610  | 3.4165320  |

65

Quitnet\_MnBnTPEN\_Hydroperoxo\_G2.log

65

Final Energy = -2620.8816464100

|   |            |            |            |
|---|------------|------------|------------|
| C | 3.4097840  | -0.0822000 | 0.9867530  |
| C | 3.8508320  | -0.4611340 | -1.2709290 |
| C | 5.2101780  | -0.6305570 | -1.0204380 |
| C | 5.6650230  | -0.5191820 | 0.2956380  |
| C | 4.7530990  | -0.2446220 | 1.3181650  |
| H | 3.4327510  | -0.5338500 | -2.2780000 |
| H | 5.8940610  | -0.8477100 | -1.8414840 |
| H | 6.7235340  | -0.6513320 | 0.5276140  |
| H | 5.0768160  | -0.1606190 | 2.3563260  |
| C | 2.3399490  | 0.2687230  | 1.9900160  |
| H | 2.2192290  | 1.3609100  | 2.0277110  |
| H | 2.6141080  | -0.0590240 | 3.0042850  |
| N | 1.0419010  | -0.3280620 | 1.5773280  |
| C | -0.1006700 | 0.3232080  | 2.2766270  |

|    |            |            |            |
|----|------------|------------|------------|
| H  | -0.1306860 | -0.0005000 | 3.3290260  |
| H  | 0.0791460  | 1.4049740  | 2.2785870  |
| C  | -1.4160630 | -0.0080550 | 1.5965860  |
| H  | -1.6016050 | -1.0884360 | 1.6582830  |
| H  | -2.2381200 | 0.4835220  | 2.1417810  |
| N  | -1.4146850 | 0.3691180  | 0.1650220  |
| C  | 1.0760640  | -1.8054520 | 1.8163840  |
| H  | 0.6149060  | -2.0413630 | 2.7865780  |
| H  | 2.1296390  | -2.1144560 | 1.8910560  |
| C  | 0.4636360  | -2.6150670 | 0.7087740  |
| C  | 0.0404490  | -3.9305440 | 0.8963170  |
| C  | -0.3927260 | -4.6632750 | -0.2089240 |
| H  | 0.0612950  | -4.3711550 | 1.8936210  |
| C  | 0.0236760  | -2.7450730 | -1.5842810 |
| C  | -0.3897440 | -4.0665260 | -1.4730340 |
| H  | -0.7275500 | -5.6947570 | -0.0848900 |
| H  | 0.0341890  | -2.2128640 | -2.5364960 |
| H  | -0.7126740 | -4.6109730 | -2.3605770 |
| C  | -1.6334250 | 1.8101530  | -0.0502410 |
| H  | -2.4144120 | 2.2075320  | 0.6167720  |
| H  | -1.9974700 | 1.9396350  | -1.0798990 |
| C  | -2.3977640 | -0.4402980 | -0.6162170 |
| H  | -2.1405860 | -1.4953880 | -0.4666060 |
| H  | -2.2297380 | -0.2013760 | -1.6735350 |
| C  | -0.3895350 | 2.6560130  | 0.0477720  |
| C  | -0.4701000 | 4.0198590  | 0.3366800  |
| C  | 1.9077580  | 2.8314020  | -0.3260440 |
| C  | 0.6841970  | 4.7981660  | 0.2793920  |
| H  | -1.4343050 | 4.4592970  | 0.5952960  |
| C  | 1.8961370  | 4.1958400  | -0.0702310 |
| H  | 2.8293630  | 2.3128270  | -0.5923750 |
| H  | 0.6393370  | 5.8658970  | 0.5018210  |
| H  | 2.8213740  | 4.7683820  | -0.1376890 |
| C  | -3.8476400 | -0.2116740 | -0.2509610 |
| C  | -4.4505380 | -0.9493940 | 0.7802460  |
| C  | -4.6129800 | 0.7520420  | -0.9256160 |
| C  | -5.7786290 | -0.7136550 | 1.1440110  |
| H  | -3.8818670 | -1.7261150 | 1.2970340  |
| C  | -5.9416280 | 0.9898540  | -0.5647230 |
| H  | -4.1706240 | 1.3162760  | -1.7501950 |
| C  | -6.5259730 | 0.2608010  | 0.4752940  |
| H  | -6.2331230 | -1.2979190 | 1.9473410  |
| H  | -6.5235820 | 1.7421760  | -1.1019430 |
| H  | -7.5653040 | 0.4442560  | 0.7572870  |
| N  | 2.9832080  | -0.1921130 | -0.2854110 |
| N  | 0.4298430  | -2.0427770 | -0.5111650 |
| N  | 0.7909650  | 2.0825830  | -0.2527640 |
| Mn | 0.8008630  | -0.0030450 | -0.5309140 |
| O  | 0.8120690  | 0.0796840  | -2.3555120 |
| O  | -0.2038590 | 0.9644160  | -2.8183920 |
| H  | -0.7141590 | 0.3881060  | -3.4158010 |

65

Quitnet\_MnBnTPEN\_Hydroperoxo\_G3.log

65

|                |                  |                       |
|----------------|------------------|-----------------------|
| Final Energy = | -2620.8750989600 |                       |
| C              | -2.9809000       | -1.5437880 0.6228330  |
| C              | -2.7974370       | -1.7149820 -1.6909880 |
| C              | -3.9148790       | -2.5412960 -1.7637320 |
| C              | -4.5764600       | -2.8738330 -0.5793680 |
| C              | -4.1093580       | -2.3611890 0.6326420  |
| H              | -2.2467190       | -1.4245190 -2.5866510 |
| H              | -4.2579180       | -2.9104580 -2.7306150 |
| H              | -5.4580130       | -3.5173000 -0.5995230 |
| H              | -4.6151950       | -2.5831470 1.5730580  |
| C              | -2.3892910       | -0.9445380 1.8732010  |
| H              | -1.6178600       | -1.6184820 2.2742050  |
| H              | -3.1566490       | -0.8208900 2.6530210  |
| N              | -1.7452900       | 0.3560410 1.5530560   |
| C              | -0.9103310       | 0.8576560 2.6813350   |
| H              | -1.5316580       | 1.4371770 3.3803350   |
| H              | -0.5511850       | -0.0158750 3.2379640  |
| C              | 0.2565240        | 1.7051650 2.1997570   |
| H              | -0.0973240       | 2.6205630 1.7081080   |
| H              | 0.8462290        | 2.0287590 3.0758880   |
| N              | 1.0993470        | 0.9610660 1.2388410   |
| C              | -2.7845270       | 1.3585900 1.1716300   |
| H              | -3.2075210       | 1.8283490 2.0710400   |
| H              | -3.6087390       | 0.8318980 0.6681060   |
| C              | -2.2473800       | 2.3811430 0.2159810   |
| C              | -2.7407840       | 3.6804520 0.1259260   |
| C              | -2.2323360       | 4.5263970 -0.8612070  |
| H              | -3.5111820       | 4.0186350 0.8194630   |
| C              | -0.7970480       | 2.7458960 -1.5804600  |
| C              | -1.2493990       | 4.0514700 -1.7330920  |
| H              | -2.6013970       | 5.5499230 -0.9484260  |
| H              | -0.0343150       | 2.3123870 -2.2300860  |
| H              | -0.8317270       | 4.6812360 -2.5187840  |
| C              | 1.7929100        | -0.1605650 1.9004840  |
| H              | 1.3345360        | -0.3512140 2.8813100  |
| H              | 2.8426790        | 0.0775170 2.1113450   |
| C              | 2.0572590        | 1.9079510 0.5726240   |
| H              | 2.4145430        | 2.6256130 1.3299030   |
| H              | 1.4856300        | 2.4828960 -0.1691780  |
| C              | 1.7088420        | -1.4467190 1.1267650  |
| C              | 2.6788400        | -2.4387260 1.2764740  |
| C              | 0.4345510        | -2.8410820 -0.2368490 |
| C              | 2.4958060        | -3.6710380 0.6536740  |
| H              | 3.5643700        | -2.2354050 1.8797730  |
| C              | 1.3417160        | -3.8831740 -0.1046260 |
| H              | -0.4587260       | -2.9524080 -0.8486060 |
| H              | 3.2444010        | -4.4586360 0.7589750  |
| H              | 1.1498950        | -4.8342010 -0.6018970 |
| C              | 3.2553410        | 1.2415520 -0.0609570  |
| C              | 3.1444650        | 0.5019820 -1.2473090  |
| C              | 4.5083630        | 1.3258730 0.5666480   |
| C              | 4.2553940        | -0.1558040 -1.7804960 |
| H              | 2.1828090        | 0.4345460 -1.7510950  |
| C              | 5.6221050        | 0.6722800 0.0324530   |



|    |            |            |            |
|----|------------|------------|------------|
| H  | 4.6119750  | 1.9055130  | 1.4877460  |
| C  | 5.4961410  | -0.0773180 | -1.1409570 |
| H  | 4.1470660  | -0.7338910 | -2.7011260 |
| H  | 6.5888350  | 0.7475980  | 0.5354580  |
| H  | 6.3637190  | -0.5942020 | -1.5577740 |
| N  | -2.3404960 | -1.2407100 | -0.5228000 |
| N  | -1.2846540 | 1.9423510  | -0.6205230 |
| N  | 0.6165570  | -1.6482030 | 0.3616710  |
| Mn | -0.5546030 | 0.0309300  | -0.2206210 |
| O  | 0.0967500  | 0.0837620  | -1.9429360 |
| O  | 0.4802730  | -1.1506600 | -2.5160860 |
| H  | -0.0686850 | -1.1779760 | -3.3202740 |

68

Quitnet\_MnBnTPEN\_MeCN\_G1.log

68

Final Energy = -2602.5261048400

|   |            |            |            |
|---|------------|------------|------------|
| C | 3.3094280  | 0.0854940  | -1.0488870 |
| C | 3.5329750  | 0.1977280  | 1.2881000  |
| C | 4.9144570  | 0.3055090  | 1.1922170  |
| C | 5.4991840  | 0.3049500  | -0.0761330 |
| C | 4.6874650  | 0.1983650  | -1.2073780 |
| H | 3.0248220  | 0.1952820  | 2.2544090  |
| H | 5.5135040  | 0.3927890  | 2.0986380  |
| H | 6.5813680  | 0.3947820  | -0.1853690 |
| H | 5.1139030  | 0.2051870  | -2.2110420 |
| C | 2.3619700  | -0.0867300 | -2.2141720 |
| H | 2.2075480  | -1.1605590 | -2.3973090 |
| H | 2.8048280  | 0.3272800  | -3.1332870 |
| N | 1.0661420  | 0.5301600  | -1.8939850 |
| C | -0.1033860 | -0.0485040 | -2.5834720 |
| H | -0.2047980 | 0.3465750  | -3.6078470 |
| H | 0.0450230  | -1.1319740 | -2.6738000 |
| C | -1.3716230 | 0.2747850  | -1.8083740 |
| H | -1.5205890 | 1.3613500  | -1.7840440 |
| H | -2.2430760 | -0.1564950 | -2.3204880 |
| N | -1.3440950 | -0.1957090 | -0.3832190 |
| C | 1.1274900  | 2.0047020  | -1.9619850 |
| H | 0.5436500  | 2.3799700  | -2.8166370 |
| H | 2.1666310  | 2.3132720  | -2.1542050 |
| C | 0.6881070  | 2.6991410  | -0.6983390 |
| C | 0.4885240  | 4.0796690  | -0.6770560 |
| C | 0.1625130  | 4.7077130  | 0.5221510  |
| H | 0.5966750  | 4.6489220  | -1.6011430 |
| C | 0.2368690  | 2.5726230  | 1.6031450  |
| C | 0.0432230  | 3.9416600  | 1.6860000  |
| H | 0.0044980  | 5.7871670  | 0.5511620  |
| H | 0.1412370  | 1.9294360  | 2.4774950  |
| H | -0.2044200 | 4.3929840  | 2.6466420  |
| C | -1.6781870 | -1.6436710 | -0.2635450 |
| H | -2.5105450 | -1.9050490 | -0.9307590 |
| H | -2.0263430 | -1.8240370 | 0.7644160  |
| C | -2.2984410 | 0.6207990  | 0.4630600  |
| H | -2.0405110 | 1.6730430  | 0.3055070  |
| H | -2.0889540 | 0.3700430  | 1.5103540  |

|    |            |            |            |
|----|------------|------------|------------|
| C  | -0.4974000 | -2.5371100 | -0.4826540 |
| C  | -0.6326100 | -3.8563260 | -0.9062350 |
| C  | 1.8046800  | -2.8314490 | -0.1548910 |
| C  | 0.4937020  | -4.6777580 | -0.9421360 |
| H  | -1.6152460 | -4.2306440 | -1.1940450 |
| C  | 1.7293190  | -4.1603150 | -0.5457940 |
| H  | 2.7516490  | -2.3904490 | 0.1504700  |
| H  | 0.4070280  | -5.7145110 | -1.2715340 |
| H  | 2.6320570  | -4.7709630 | -0.5449570 |
| C  | -3.7567450 | 0.3880860  | 0.1484310  |
| C  | -4.3878580 | 1.0931770  | -0.8889820 |
| C  | -4.5036470 | -0.5407470 | 0.8896270  |
| C  | -5.7286990 | 0.8533460  | -1.1964370 |
| H  | -3.8353660 | 1.8470790  | -1.4534950 |
| C  | -5.8450180 | -0.7810440 | 0.5837160  |
| H  | -4.0382210 | -1.0747840 | 1.7216810  |
| C  | -6.4580070 | -0.0892830 | -0.4650000 |
| H  | -6.2069970 | 1.4100030  | -2.0051330 |
| H  | -6.4134680 | -1.5061510 | 1.1699770  |
| H  | -7.5069790 | -0.2763030 | -0.7052270 |
| N  | 2.7605840  | 0.0870400  | 0.1901440  |
| N  | 0.5443470  | 1.9710140  | 0.4312010  |
| N  | 0.7140670  | -2.0352030 | -0.1397210 |
| Mn | 0.7051080  | -0.0410250 | 0.2950590  |
| N  | 0.2756350  | -0.5078250 | 2.3904040  |
| C  | 0.0981690  | -0.9713010 | 3.4355150  |
| C  | -0.1278000 | -1.5485530 | 4.7409070  |
| H  | 0.2987800  | -2.5622190 | 4.7697120  |
| H  | 0.3554440  | -0.9232130 | 5.5061330  |
| H  | -1.2095150 | -1.5982440 | 4.9350860  |

68

Quitnet\_MnBnTPEN\_MeCN\_G2.log

68

|                |            |                  |            |
|----------------|------------|------------------|------------|
| Final Energy = |            | -2602.5214889000 |            |
| C              | -2.4288780 | 1.9684550        | -0.9732470 |
| C              | -2.2205690 | 2.1955590        | 1.3391730  |
| C              | -3.0402870 | 3.3179010        | 1.3473620  |
| C              | -3.5521100 | 3.7836500        | 0.1356060  |
| C              | -3.2528920 | 3.0891950        | -1.0367480 |
| H              | -1.8089270 | 1.7968960        | 2.2639650  |
| H              | -3.2711690 | 3.8080720        | 2.2932660  |
| H              | -4.1962130 | 4.6641950        | 0.1051420  |
| H              | -3.6658120 | 3.3981110        | -1.9977860 |
| C              | -2.1128090 | 1.1359450        | -2.1894530 |
| H              | -1.1864610 | 1.4971890        | -2.6621080 |
| H              | -2.9163290 | 1.2375640        | -2.9368770 |
| N              | -1.9189150 | -0.2601300       | -1.7668860 |
| C              | -1.3005980 | -1.1380860       | -2.7838320 |
| H              | -2.0578540 | -1.7704020       | -3.2703720 |
| H              | -0.8789670 | -0.5128120       | -3.5796320 |
| C              | -0.2376610 | -2.0353020       | -2.1641120 |
| H              | -0.6831290 | -2.8162190       | -1.5352690 |
| H              | 0.3237990  | -2.5450480       | -2.9629600 |
| N              | 0.7164470  | -1.2629710       | -1.3136890 |

|    |            |            |            |
|----|------------|------------|------------|
| C  | -3.1554680 | -0.8443840 | -1.2140730 |
| H  | -3.7583870 | -1.3190150 | -2.0020790 |
| H  | -3.7766000 | -0.0447360 | -0.7837420 |
| C  | -2.8483520 | -1.8211350 | -0.1186890 |
| C  | -3.6918760 | -2.8874220 | 0.1843980  |
| C  | -3.3792440 | -3.7243310 | 1.2542700  |
| H  | -4.5825150 | -3.0539090 | -0.4224570 |
| C  | -1.4221680 | -2.3994930 | 1.6445670  |
| C  | -2.2239770 | -3.4743420 | 1.9983910  |
| H  | -4.0272200 | -4.5668400 | 1.5021250  |
| H  | -0.5127890 | -2.1755510 | 2.1992850  |
| H  | -1.9362720 | -4.1028540 | 2.8410980  |
| C  | 1.4617880  | -0.2742490 | -2.1485010 |
| H  | 0.8077220  | 0.0771790  | -2.9549550 |
| H  | 2.3227580  | -0.7452790 | -2.6367520 |
| C  | 1.6776400  | -2.2440350 | -0.6556840 |
| H  | 1.9077430  | -3.0042390 | -1.4166810 |
| H  | 1.1265000  | -2.7439550 | 0.1511090  |
| C  | 1.8571390  | 0.9126670  | -1.3370540 |
| C  | 3.0189740  | 1.6462150  | -1.5508990 |
| C  | 1.1568820  | 2.4110930  | 0.3259980  |
| C  | 3.2439610  | 2.7930820  | -0.7910270 |
| H  | 3.7379540  | 1.3096990  | -2.2969390 |
| C  | 2.2931190  | 3.1871070  | 0.1544540  |
| H  | 0.4006310  | 2.6769890  | 1.0618120  |
| H  | 4.1552530  | 3.3758960  | -0.9352340 |
| H  | 2.4276330  | 4.0812360  | 0.7629720  |
| C  | 2.9578240  | -1.6218510 | -0.1612940 |
| C  | 3.0347770  | -1.0006020 | 1.0933390  |
| C  | 4.0983320  | -1.6245880 | -0.9810980 |
| C  | 4.1946410  | -0.3364770 | 1.4941980  |
| H  | 2.1772620  | -1.0356980 | 1.7636320  |
| C  | 5.2632920  | -0.9665430 | -0.5821490 |
| H  | 4.0745060  | -2.1390690 | -1.9449470 |
| C  | 5.3081060  | -0.3057790 | 0.6493610  |
| H  | 4.2286880  | 0.1535730  | 2.4693880  |
| H  | 6.1375490  | -0.9679260 | -1.2362820 |
| H  | 6.2150990  | 0.2190480  | 0.9567840  |
| N  | -1.9040760 | 1.5497720  | 0.2017970  |
| N  | -1.7271210 | -1.5940300 | 0.6032550  |
| N  | 0.9513530  | 1.2949060  | -0.4032840 |
| Mn | -0.4877260 | -0.0559390 | 0.0456000  |
| N  | -0.0473380 | 0.2774790  | 2.1904450  |
| C  | 0.3679430  | 0.4230980  | 3.2600700  |
| C  | 0.9001330  | 0.6086640  | 4.5908880  |
| H  | 0.7964240  | 1.6643670  | 4.8821790  |
| H  | 0.3493060  | -0.0262150 | 5.3002350  |
| H  | 1.9645500  | 0.3289650  | 4.5953240  |

68

Quitnet\_MnBnTPEN\_MeCN\_G3.log

68

Final Energy = -2602.5261051100

|   |           |           |            |
|---|-----------|-----------|------------|
| C | 3.3093940 | 0.0852210 | -1.0487490 |
| C | 3.5327680 | 0.1975400 | 1.2882550  |

|   |            |            |            |
|---|------------|------------|------------|
| C | 4.9142640  | 0.3052400  | 1.1924720  |
| C | 5.4990890  | 0.3045820  | -0.0758300 |
| C | 4.6874480  | 0.1980030  | -1.2071330 |
| H | 3.0245620  | 0.1951930  | 2.2545310  |
| H | 5.5132480  | 0.3925380  | 2.0989330  |
| H | 6.5812860  | 0.3943500  | -0.1849880 |
| H | 5.1139640  | 0.2047750  | -2.2107650 |
| C | 2.3620080  | -0.0869280 | -2.2141030 |
| H | 2.2074280  | -1.1607440 | -2.3971880 |
| H | 2.8050190  | 0.3269440  | -3.1332070 |
| N | 1.0662560  | 0.5301780  | -1.8940690 |
| C | -0.1033310 | -0.0483770 | -2.5835400 |
| H | -0.2047460 | 0.3467270  | -3.6079050 |
| H | 0.0449950  | -1.1318550 | -2.6738960 |
| C | -1.3715390 | 0.2750000  | -1.8084300 |
| H | -1.5204070 | 1.3615780  | -1.7840610 |
| H | -2.2430290 | -0.1561960 | -2.3205460 |
| N | -1.3440660 | -0.1955510 | -0.3832770 |
| C | 1.1277810  | 2.0046890  | -1.9620700 |
| H | 0.5439510  | 2.3800310  | -2.8166970 |
| H | 2.1669500  | 2.3131520  | -2.1543250 |
| C | 0.6884820  | 2.6991710  | -0.6984110 |
| C | 0.4892090  | 4.0797470  | -0.6770940 |
| C | 0.1631790  | 4.7078120  | 0.5220920  |
| H | 0.5976070  | 4.6490090  | -1.6011470 |
| C | 0.2368980  | 2.5726630  | 1.6030080  |
| C | 0.0435420  | 3.9417350  | 1.6858950  |
| H | 0.0054090  | 5.7873010  | 0.5511310  |
| H | 0.1409910  | 1.9294450  | 2.4773090  |
| H | -0.2041380 | 4.3930800  | 2.6465170  |
| C | -1.6783470 | -1.6434880 | -0.2636680 |
| H | -2.5107310 | -1.9047120 | -0.9309060 |
| H | -2.0265520 | -1.8238460 | 0.7642780  |
| C | -2.2983730 | 0.6210170  | 0.4630200  |
| H | -2.0404490 | 1.6732500  | 0.3054040  |
| H | -2.0888310 | 0.3703070  | 1.5103140  |
| C | -0.4976480 | -2.5370290 | -0.4828010 |
| C | -0.6329830 | -3.8562050 | -0.9064580 |
| C | 1.8043850  | -2.8316040 | -0.1550070 |
| C | 0.4932500  | -4.6777530 | -0.9423690 |
| H | -1.6156490 | -4.2304110 | -1.1943140 |
| C | 1.7289030  | -4.1604520 | -0.5459730 |
| H | 2.7514030  | -2.3907180 | 0.1503690  |
| H | 0.4064730  | -5.7144820 | -1.2718170 |
| H | 2.6315880  | -4.7711790 | -0.5451440 |
| C | -3.7566900 | 0.3882990  | 0.1484820  |
| C | -4.3878350 | 1.0932420  | -0.8890090 |
| C | -4.5035870 | -0.5403830 | 0.8898760  |
| C | -5.7287030 | 0.8534050  | -1.1963500 |
| H | -3.8353640 | 1.8470430  | -1.4536750 |
| C | -5.8449830 | -0.7806810 | 0.5840840  |
| H | -4.0381330 | -1.0743040 | 1.7219890  |
| C | -6.4580060 | -0.0890740 | -0.4647150 |
| H | -6.2070230 | 1.4099450  | -2.0051120 |

|    |            |            |            |
|----|------------|------------|------------|
| H  | -6.4134250 | -1.5056650 | 1.1705030  |
| H  | -7.5069980 | -0.2760910 | -0.7048530 |
| N  | 2.7604520  | 0.0868250  | 0.1902460  |
| N  | 0.5444150  | 1.9710370  | 0.4310760  |
| N  | 0.7138630  | -2.0352550 | -0.1398070 |
| Mn | 0.7049810  | -0.0410330 | 0.2950090  |
| N  | 0.2756100  | -0.5079680 | 2.3903930  |
| C  | 0.0982670  | -0.9714840 | 3.4355060  |
| C  | -0.1276490 | -1.5487690 | 4.7408930  |
| H  | 0.2984360  | -2.5626490 | 4.7694850  |
| H  | 0.3561040  | -0.9237490 | 5.5060580  |
| H  | -1.2093390 | -1.5979540 | 4.9353470  |

63

Quitnet\_MnBnTPEN\_Oxo\_G2.log

63

Final Energy = -2544.9571014400

|   |            |            |            |
|---|------------|------------|------------|
| C | 2.3570430  | 2.1161010  | 0.3063570  |
| C | 2.0321420  | 1.9205760  | -1.9925350 |
| C | 2.8983910  | 2.9798850  | -2.2480320 |
| C | 3.5044440  | 3.6228850  | -1.1660790 |
| C | 3.2383300  | 3.1805100  | 0.1317240  |
| H | 1.5301490  | 1.3841890  | -2.8012860 |
| H | 3.0935310  | 3.2888610  | -3.2753040 |
| H | 4.1905960  | 4.4556480  | -1.3311430 |
| H | 3.7126690  | 3.6457920  | 0.9965790  |
| C | 1.9961390  | 1.5570730  | 1.6615600  |
| H | 1.1052170  | 2.0679860  | 2.0542900  |
| H | 2.8115890  | 1.7135250  | 2.3841370  |
| N | 1.6855650  | 0.1091500  | 1.5261690  |
| C | 1.0517390  | -0.4589020 | 2.7543460  |
| H | 1.8276160  | -0.7933920 | 3.4577790  |
| H | 0.5097490  | 0.3543890  | 3.2516330  |
| C | 0.1083030  | -1.6092260 | 2.4280330  |
| H | 0.6441110  | -2.4471390 | 1.9637460  |
| H | -0.3393170 | -1.9909630 | 3.3606810  |
| N | -0.9284240 | -1.1364800 | 1.4833560  |
| C | 2.9307520  | -0.6363430 | 1.1692920  |
| H | 3.4535820  | -0.9577490 | 2.0806480  |
| H | 3.6097490  | 0.0486190  | 0.6402860  |
| C | 2.6579130  | -1.7861770 | 0.2525510  |
| C | 3.5117580  | -2.8802440 | 0.1398440  |
| C | 3.2469480  | -3.8465420 | -0.8307120 |
| H | 4.3733140  | -2.9637800 | 0.8028940  |
| C | 1.3169560  | -2.5851380 | -1.4900080 |
| C | 2.1383300  | -3.6907990 | -1.6666610 |
| H | 3.9029550  | -4.7125320 | -0.9352740 |
| H | 0.4373130  | -2.4082610 | -2.1077060 |
| H | 1.9040940  | -4.4173350 | -2.4447990 |
| C | -1.8535710 | -0.1715820 | 2.1099910  |
| H | -1.4588480 | 0.1396500  | 3.0870990  |
| H | -2.8273290 | -0.6340710 | 2.3281420  |
| C | -1.6606240 | -2.2334400 | 0.8077520  |
| H | -2.2009080 | -2.8560970 | 1.5387750  |
| H | -0.9310300 | -2.8792260 | 0.2962490  |

|    |            |            |            |
|----|------------|------------|------------|
| C  | -2.0436170 | 1.0682040  | 1.2752090  |
| C  | -3.1557010 | 1.8920640  | 1.4498070  |
| C  | -1.1679100 | 2.5230020  | -0.3275880 |
| C  | -3.2569320 | 3.0681570  | 0.7103340  |
| H  | -3.9294980 | 1.6036770  | 2.1621970  |
| C  | -2.2401010 | 3.3926920  | -0.1913780 |
| H  | -0.3664060 | 2.7274990  | -1.0349620 |
| H  | -4.1219410 | 3.7224880  | 0.8316870  |
| H  | -2.2770370 | 4.2999220  | -0.7944200 |
| C  | -2.6298890 | -1.6660880 | -0.1923230 |
| C  | -2.1120560 | -0.9722770 | -1.3957660 |
| C  | -3.9988420 | -1.7914610 | -0.0410710 |
| C  | -3.0781250 | -0.2048980 | -2.1955820 |
| H  | -2.2801250 | -1.9055290 | -2.0619170 |
| C  | -4.8849670 | -1.1323660 | -0.9122520 |
| H  | -4.3988820 | -2.3628270 | 0.7978820  |
| C  | -4.4324520 | -0.3369660 | -1.9785960 |
| H  | -2.6719480 | 0.3866710  | -3.0188210 |
| H  | -5.9590440 | -1.2304890 | -0.7402690 |
| H  | -5.1460710 | 0.1859800  | -2.6160550 |
| N  | 1.7649030  | 1.5126570  | -0.7418020 |
| N  | 1.5702040  | -1.6640180 | -0.5400690 |
| N  | -1.0718330 | 1.3865210  | 0.3941990  |
| Mn | 0.3308260  | -0.0760840 | -0.1325560 |
| O  | -0.8072270 | -0.6163020 | -1.4776420 |

63

Quitnet\_MnBnTPEN\_Oxo\_G3.log

63

Final Energy = -2544.8823886400

|   |            |            |            |
|---|------------|------------|------------|
| C | 3.2534640  | 0.1724480  | 0.7095540  |
| C | 3.3425230  | -0.2475520 | -1.6044640 |
| C | 4.7290200  | -0.3358780 | -1.5699350 |
| C | 5.3842150  | -0.1661770 | -0.3482530 |
| C | 4.6382490  | 0.0882500  | 0.8058020  |
| H | 2.7621830  | -0.3681150 | -2.5198330 |
| H | 5.2801260  | -0.5373600 | -2.4886690 |
| H | 6.4718990  | -0.2359730 | -0.2908790 |
| H | 5.1209420  | 0.2186160  | 1.7748950  |
| C | 2.3504860  | 0.5050320  | 1.8713450  |
| H | 2.1990010  | 1.5936450  | 1.9112950  |
| H | 2.8114290  | 0.2157730  | 2.8272340  |
| N | 1.0393870  | -0.1505690 | 1.6660060  |
| C | -0.1041740 | 0.5328380  | 2.3166200  |
| H | -0.1527380 | 0.3027500  | 3.3930400  |
| H | 0.0372970  | 1.6161420  | 2.2288820  |
| C | -1.3970640 | 0.0837830  | 1.6524560  |
| H | -1.5457880 | -0.9875360 | 1.8371420  |
| H | -2.2490930 | 0.6170910  | 2.0989350  |
| N | -1.3723510 | 0.2784850  | 0.1628370  |
| C | 1.1087700  | -1.5973400 | 2.0143210  |
| H | 0.4209500  | -1.8219600 | 2.8431660  |
| H | 2.1130670  | -1.8338960 | 2.3949860  |
| C | 0.8213890  | -2.5054090 | 0.8509990  |
| C | 0.8045810  | -3.8933580 | 0.9933130  |

|    |            |            |            |
|----|------------|------------|------------|
| C  | 0.5800920  | -4.6865620 | -0.1296510 |
| H  | 0.9736560  | -4.3367710 | 1.9754160  |
| C  | 0.4000470  | -2.6918610 | -1.4465520 |
| C  | 0.3806340  | -4.0757610 | -1.3725620 |
| H  | 0.5656940  | -5.7741410 | -0.0387920 |
| H  | 0.2495030  | -2.1406040 | -2.3755170 |
| H  | 0.2104140  | -4.6627140 | -2.2752640 |
| C  | -1.7373140 | 1.6638440  | -0.2467900 |
| H  | -2.6223960 | 2.0168690  | 0.3015460  |
| H  | -1.9912420 | 1.6317880  | -1.3169210 |
| C  | -2.2385860 | -0.7039680 | -0.5609150 |
| H  | -1.9807200 | -1.7104650 | -0.2080310 |
| H  | -1.9760160 | -0.6281700 | -1.6230420 |
| C  | -0.5953090 | 2.6244460  | -0.1117730 |
| C  | -0.7895260 | 3.9902980  | 0.0769560  |
| C  | 1.7025480  | 2.9253260  | -0.3584390 |
| C  | 0.3146660  | 4.8416750  | 0.0369290  |
| H  | -1.7960580 | 4.3751540  | 0.2423720  |
| C  | 1.5793850  | 4.3006790  | -0.2002320 |
| H  | 2.6740460  | 2.4687060  | -0.5395280 |
| H  | 0.1876620  | 5.9157280  | 0.1821400  |
| H  | 2.4686430  | 4.9286100  | -0.2561480 |
| C  | -3.7188600 | -0.4910760 | -0.3713370 |
| C  | -4.3773130 | -0.9621700 | 0.8187590  |
| C  | -4.4747130 | 0.1841090  | -1.3833590 |
| C  | -5.7137580 | -0.7213470 | 1.0095530  |
| H  | -3.8086790 | -1.5194460 | 1.5626460  |
| C  | -5.8116020 | 0.4283720  | -1.1951610 |
| H  | -3.9757370 | 0.5050310  | -2.2985150 |
| C  | -6.4465980 | -0.0189410 | 0.0075280  |
| H  | -6.2250200 | -1.0676510 | 1.9081610  |
| H  | -6.3996750 | 0.9534590  | -1.9486910 |
| H  | -7.5129820 | 0.1683830  | 0.1518260  |
| N  | 2.6372730  | 0.0025380  | -0.4868890 |
| N  | 0.6057940  | -1.9326500 | -0.3489010 |
| N  | 0.6371350  | 2.1062430  | -0.2945560 |
| Mn | 0.6541640  | 0.0689240  | -0.4554570 |
| O  | 0.3241690  | 0.0979290  | -2.0681480 |

64

Quitnet\_MnBnTPEN\_Peroxide\_Mn3\_G1.log

64

Final Energy = -2620.4299947200

|   |           |            |            |
|---|-----------|------------|------------|
| C | 3.3662450 | -0.0730020 | 0.9572820  |
| C | 3.8488580 | -0.6581060 | -1.2400620 |
| C | 5.2007750 | -0.8244600 | -0.9510670 |
| C | 5.6359590 | -0.5973590 | 0.3563220  |
| C | 4.7043200 | -0.2242770 | 1.3257110  |
| H | 3.4471290 | -0.8332340 | -2.2403410 |
| H | 5.8927280 | -1.1313130 | -1.7363680 |
| H | 6.6877940 | -0.7215760 | 0.6218070  |
| H | 5.0034420 | -0.0583640 | 2.3618290  |
| C | 2.3026370 | 0.3471520  | 1.9422510  |
| H | 2.1890870 | 1.4403660  | 1.8937110  |
| H | 2.6252570 | 0.1111460  | 2.9723480  |

|    |            |            |            |
|----|------------|------------|------------|
| N  | 1.0159980  | -0.2648140 | 1.6019120  |
| C  | -0.1234790 | 0.4458370  | 2.1957190  |
| H  | -0.2457700 | 0.1848950  | 3.2637780  |
| H  | 0.0875840  | 1.5218780  | 2.1590930  |
| C  | -1.4237700 | 0.1369880  | 1.4714340  |
| H  | -1.6445040 | -0.9340440 | 1.5712980  |
| H  | -2.2484020 | 0.6728740  | 1.9730830  |
| N  | -1.3821020 | 0.4496230  | 0.0308340  |
| C  | 1.0194620  | -1.7059330 | 1.9022000  |
| H  | 0.6038630  | -1.9026970 | 2.9056290  |
| H  | 2.0661150  | -2.0479160 | 1.9362480  |
| C  | 0.3258460  | -2.5776820 | 0.8794890  |
| C  | -0.2251090 | -3.8126460 | 1.2376810  |
| C  | -0.7538590 | -4.6322630 | 0.2409890  |
| H  | -0.2338180 | -4.1220670 | 2.2841010  |
| C  | -0.1821120 | -2.9444660 | -1.3587900 |
| C  | -0.7251040 | -4.1964380 | -1.0869330 |
| H  | -1.1886750 | -5.6003770 | 0.4981530  |
| H  | -0.1704320 | -2.5228170 | -2.3667050 |
| H  | -1.1294690 | -4.8064950 | -1.8955800 |
| C  | -1.5433660 | 1.8849170  | -0.2521440 |
| H  | -2.3830510 | 2.3204840  | 0.3149340  |
| H  | -1.7940060 | 1.9749840  | -1.3204560 |
| C  | -2.3949190 | -0.3474180 | -0.7181210 |
| H  | -2.1661530 | -1.4047910 | -0.5411370 |
| H  | -2.2316310 | -0.1510320 | -1.7850210 |
| C  | -0.3025390 | 2.7199230  | -0.0466100 |
| C  | -0.3777920 | 4.0387870  | 0.4106330  |
| C  | 1.9875900  | 2.9104670  | -0.3751320 |
| C  | 0.7869060  | 4.8051930  | 0.4626030  |
| H  | -1.3389370 | 4.4540020  | 0.7175960  |
| C  | 1.9948980  | 4.2357140  | 0.0525520  |
| H  | 2.9071050  | 2.4133170  | -0.6935410 |
| H  | 0.7519160  | 5.8367980  | 0.8187400  |
| H  | 2.9272920  | 4.8012810  | 0.0692220  |
| C  | -3.8367640 | -0.0756710 | -0.3423850 |
| C  | -4.4639910 | -0.8178130 | 0.6710210  |
| C  | -4.5727750 | 0.9310370  | -0.9871800 |
| C  | -5.7830450 | -0.5486490 | 1.0456310  |
| H  | -3.9174040 | -1.6241030 | 1.1665510  |
| C  | -5.8919920 | 1.2041190  | -0.6158680 |
| H  | -4.1126550 | 1.5026540  | -1.7967160 |
| C  | -6.4993700 | 0.4676240  | 0.4058670  |
| H  | -6.2546870 | -1.1383270 | 1.8353060  |
| H  | -6.4493010 | 1.9904250  | -1.1305230 |
| H  | -7.5313390 | 0.6786030  | 0.6960270  |
| N  | 2.9593550  | -0.2811550 | -0.3077780 |
| N  | 0.3280450  | -2.1618520 | -0.3949630 |
| N  | 0.8686100  | 2.1739580  | -0.4115940 |
| Mn | 0.8226070  | -0.0354010 | -0.8565010 |
| O  | 1.3352480  | 0.0029550  | -2.7047460 |
| O  | -0.0458300 | -0.0003680 | -2.5787480 |

64

Quitnet\_MnBnTPEN\_Peroxide\_Mn3\_G2.log



64

|                |            |                  |            |
|----------------|------------|------------------|------------|
| Final Energy = |            | -2620.4299947200 |            |
| C              | 3.3662300  | -0.0730070       | 0.9572830  |
| C              | 3.8488380  | -0.6581240       | -1.2400580 |
| C              | 5.2007570  | -0.8244650       | -0.9510680 |
| C              | 5.6359450  | -0.5973520       | 0.3563180  |
| C              | 4.7043070  | -0.2242710       | 1.3257080  |
| H              | 3.4471060  | -0.8332630       | -2.2403340 |
| H              | 5.8927090  | -1.1313180       | -1.7363700 |
| H              | 6.6877820  | -0.7215600       | 0.6218000  |
| H              | 5.0034330  | -0.0583470       | 2.3618240  |
| C              | 2.3026250  | 0.3471520        | 1.9422540  |
| H              | 2.1890800  | 1.4403660        | 1.8937120  |
| H              | 2.6252460  | 0.1111450        | 2.9723500  |
| N              | 1.0159840  | -0.2648090       | 1.6019190  |
| C              | -0.1234900 | 0.4458500        | 2.1957210  |
| H              | -0.2457880 | 0.1849100        | 3.2637800  |
| H              | 0.0875800  | 1.5218890        | 2.1590940  |
| C              | -1.4237780 | 0.1370060        | 1.4714260  |
| H              | -1.6445140 | -0.9340260       | 1.5712810  |
| H              | -2.2484140 | 0.6728910        | 1.9730700  |
| N              | -1.3820980 | 0.4496470        | 0.0308260  |
| C              | 1.0194390  | -1.7059270       | 1.9022160  |
| H              | 0.6038200  | -1.9026810       | 2.9056400  |
| H              | 2.0660910  | -2.0479110       | 1.9362880  |
| C              | 0.3258400  | -2.5776830       | 0.8795000  |
| C              | -0.2251050 | -3.8126520       | 1.2376910  |
| C              | -0.7538380 | -4.6322790       | 0.2409990  |
| H              | -0.2338200 | -4.1220690       | 2.2841130  |
| C              | -0.1820930 | -2.9444820       | -1.3587820 |
| C              | -0.7250740 | -4.1964590       | -1.0869260 |
| H              | -1.1886440 | -5.6003960       | 0.4981620  |
| H              | -0.1704060 | -2.5228380       | -2.3666990 |
| H              | -1.1294220 | -4.8065240       | -1.8955740 |
| C              | -1.5433560 | 1.8849450        | -0.2521390 |
| H              | -2.3830330 | 2.3205140        | 0.3149500  |
| H              | -1.7940050 | 1.9750230        | -1.3204480 |
| C              | -2.3949150 | -0.3473860       | -0.7181390 |
| H              | -2.1661420 | -1.4047600       | -0.5411730 |
| H              | -2.2316320 | -0.1509820       | -1.7850360 |
| C              | -0.3025200 | 2.7199380        | -0.0466110 |
| C              | -0.3777530 | 4.0388010        | 0.4106360  |
| C              | 1.9876090  | 2.9104520        | -0.3751500 |
| C              | 0.7869570  | 4.8051910        | 0.4625990  |
| H              | -1.3388900 | 4.4540280        | 0.7176070  |
| C              | 1.9949370  | 4.2356980        | 0.0525360  |
| H              | 2.9071150  | 2.4132900        | -0.6935670 |
| H              | 0.7519830  | 5.8367960        | 0.8187390  |
| H              | 2.9273390  | 4.8012530        | 0.0691990  |
| C              | -3.8367600 | -0.0756520       | -0.3423930 |
| C              | -4.4639800 | -0.8178130       | 0.6710040  |
| C              | -4.5727800 | 0.9310600        | -0.9871720 |
| C              | -5.7830340 | -0.5486620       | 1.0456210  |
| H              | -3.9173870 | -1.6241070       | 1.1665210  |

|    |            |            |            |
|----|------------|------------|------------|
| C  | -5.8919970 | 1.2041290  | -0.6158530 |
| H  | -4.1126660 | 1.5026900  | -1.7967040 |
| C  | -6.4993660 | 0.4676170  | 0.4058750  |
| H  | -6.2546700 | -1.1383550 | 1.8352890  |
| H  | -6.4493120 | 1.9904380  | -1.1304960 |
| H  | -7.5313360 | 0.6785860  | 0.6960410  |
| N  | 2.9593360  | -0.2811740 | -0.3077730 |
| N  | 0.3280460  | -2.1618580 | -0.3949540 |
| N  | 0.8686190  | 2.1739580  | -0.4116050 |
| Mn | 0.8225870  | -0.0353980 | -0.8565020 |
| O  | 1.3352290  | 0.0029170  | -2.7047500 |
| O  | -0.0458500 | -0.0003980 | -2.5787460 |

64

Quitnet\_MnBnTPEN\_Peroxide\_Mn3\_G3.log

64

Final Energy = -2620.4287994400

|   |            |            |            |
|---|------------|------------|------------|
| C | 2.1946180  | 2.3317960  | 0.8105010  |
| C | 1.8099070  | 2.7483660  | -1.4397660 |
| C | 2.4311680  | 3.9922200  | -1.3682010 |
| C | 2.9552010  | 4.4060830  | -0.1417240 |
| C | 2.8412230  | 3.5605940  | 0.9615180  |
| H | 1.3861260  | 2.3737650  | -2.3735390 |
| H | 2.5045720  | 4.6166550  | -2.2594350 |
| H | 3.4549300  | 5.3722990  | -0.0471900 |
| H | 3.2498100  | 3.8425050  | 1.9332350  |
| C | 1.9940380  | 1.3918210  | 1.9738270  |
| H | 1.0283390  | 1.6354950  | 2.4436290  |
| H | 2.7712450  | 1.5680230  | 2.7395810  |
| N | 1.9525370  | -0.0021580 | 1.5278510  |
| C | 1.3599050  | -0.9184470 | 2.5226450  |
| H | 2.1384850  | -1.5390760 | 2.9959060  |
| H | 0.9264460  | -0.3228770 | 3.3367970  |
| C | 0.3053330  | -1.8487300 | 1.9291780  |
| H | 0.7803360  | -2.6163460 | 1.3054590  |
| H | -0.2009220 | -2.3777510 | 2.7581240  |
| N | -0.6828400 | -1.1507830 | 1.0808530  |
| C | 3.2734980  | -0.4538030 | 1.0725290  |
| H | 3.9432440  | -0.6616380 | 1.9256280  |
| H | 3.7385470  | 0.3605810  | 0.4944110  |
| C | 3.1795700  | -1.6576730 | 0.1702860  |
| C | 4.1382250  | -2.6732650 | 0.1780740  |
| C | 4.0128840  | -3.7236150 | -0.7330470 |
| H | 4.9659080  | -2.6371190 | 0.8882610  |
| C | 2.0149780  | -2.6813040 | -1.5538080 |
| C | 2.9337420  | -3.7278610 | -1.6194010 |
| H | 4.7472810  | -4.5317710 | -0.7466700 |
| H | 1.1423890  | -2.6214310 | -2.2084190 |
| H | 2.7979740  | -4.5302090 | -2.3459930 |
| C | -1.4620010 | -0.1660600 | 1.8561860  |
| H | -0.7881370 | 0.3253750  | 2.5700960  |
| H | -2.2490920 | -0.6440180 | 2.4595770  |
| C | -1.5564760 | -2.1943970 | 0.4281150  |
| H | -1.6712410 | -3.0284420 | 1.1404730  |
| H | -1.0043950 | -2.5732530 | -0.4424500 |

|    |            |            |            |
|----|------------|------------|------------|
| C  | -2.0453640 | 0.9064900  | 0.9718530  |
| C  | -3.2900680 | 1.4901720  | 1.2163630  |
| C  | -1.7191320 | 2.2305090  | -0.9024220 |
| C  | -3.7487890 | 2.4779820  | 0.3468460  |
| H  | -3.8965770 | 1.1502200  | 2.0562330  |
| C  | -2.9534420 | 2.8538500  | -0.7394520 |
| H  | -1.0627920 | 2.4723690  | -1.7413900 |
| H  | -4.7254860 | 2.9398970  | 0.5049230  |
| H  | -3.2840680 | 3.6108040  | -1.4518610 |
| C  | -2.9389540 | -1.7313810 | 0.0295440  |
| C  | -3.1774030 | -1.0619710 | -1.1810590 |
| C  | -4.0180420 | -1.9556300 | 0.8994040  |
| C  | -4.4568280 | -0.5994360 | -1.4940140 |
| H  | -2.3405870 | -0.8777800 | -1.8560610 |
| C  | -5.2983920 | -1.4910150 | 0.5886390  |
| H  | -3.8529110 | -2.4950500 | 1.8357600  |
| C  | -5.5193410 | -0.8035210 | -0.6081310 |
| H  | -4.6233690 | -0.0673550 | -2.4336710 |
| H  | -6.1240860 | -1.6673880 | 1.2819980  |
| H  | -6.5181160 | -0.4336430 | -0.8521330 |
| N  | 1.6923340  | 1.9415430  | -0.3729390 |
| N  | 2.1387150  | -1.6764210 | -0.6759410 |
| N  | -1.2776520 | 1.2906250  | -0.0578160 |
| Mn | 0.5556300  | 0.0203690  | -0.5257170 |
| O  | -0.2520650 | -0.7918590 | -2.1113160 |
| O  | 0.5712390  | 0.2690660  | -2.4298460 |

65

Triplet\_MnBnTPEN\_Hydroperoxo\_G1.log

65

Final Energy = -2620.8687140700

|   |            |            |            |
|---|------------|------------|------------|
| C | -3.2823490 | 0.0199660  | -0.8716550 |
| C | -3.4365040 | -0.4142270 | 1.4231400  |
| C | -4.8206870 | -0.5340040 | 1.3439830  |
| C | -5.4408320 | -0.3714800 | 0.1032360  |
| C | -4.6608740 | -0.0955700 | -1.0227490 |
| H | -2.8876810 | -0.5233490 | 2.3602080  |
| H | -5.3969590 | -0.7547520 | 2.2428440  |
| H | -6.5241700 | -0.4658850 | 0.0095080  |
| H | -5.1107670 | 0.0259650  | -2.0086760 |
| C | -2.3317550 | 0.3515810  | -1.9944710 |
| H | -2.1840130 | 1.4395470  | -2.0489110 |
| H | -2.7259850 | 0.0303060  | -2.9699460 |
| N | -1.0274840 | -0.2906330 | -1.6937660 |
| C | 0.1358310  | 0.3294030  | -2.3780440 |
| H | 0.1920340  | 0.0075550  | -3.4296530 |
| H | -0.0013800 | 1.4173720  | -2.3792870 |
| C | 1.3986300  | -0.0709860 | -1.6395740 |
| H | 1.5319650  | -1.1589560 | -1.6955530 |
| H | 2.2804080  | 0.3849400  | -2.1126590 |
| N | 1.3304180  | 0.2980850  | -0.1910090 |
| C | -1.1136130 | -1.7613540 | -1.9524740 |
| H | -0.5483510 | -2.0195170 | -2.8598560 |
| H | -2.1613810 | -2.0179210 | -2.1662820 |
| C | -0.6708640 | -2.5981550 | -0.7858070 |

|    |            |            |            |
|----|------------|------------|------------|
| C  | -0.4830730 | -3.9761510 | -0.9011510 |
| C  | -0.1703360 | -4.7124470 | 0.2395340  |
| H  | -0.5904070 | -4.4564870 | -1.8745410 |
| C  | -0.2387030 | -2.6746840 | 1.5040020  |
| C  | -0.0572160 | -4.0508260 | 1.4657980  |
| H  | -0.0195490 | -5.7914660 | 0.1740610  |
| H  | -0.1433470 | -2.0941690 | 2.4220000  |
| H  | 0.1784240  | -4.5898190 | 2.3837890  |
| C  | 1.6417990  | 1.7384690  | 0.0172300  |
| H  | 2.4591060  | 2.0667960  | -0.6397600 |
| H  | 1.9838060  | 1.8511010  | 1.0546640  |
| C  | 2.2741980  | -0.5496770 | 0.6207700  |
| H  | 1.9966780  | -1.5934150 | 0.4412430  |
| H  | 2.0641620  | -0.3172340 | 1.6709170  |
| C  | 0.4410520  | 2.6261390  | -0.1106490 |
| C  | 0.5592110  | 3.9944940  | -0.3530740 |
| C  | -1.8553950 | 2.8315730  | 0.2307010  |
| C  | -0.5810850 | 4.7932570  | -0.2931330 |
| H  | 1.5384280  | 4.4207020  | -0.5735950 |
| C  | -1.8087520 | 4.2030820  | 0.0199760  |
| H  | -2.7931120 | 2.3329940  | 0.4722400  |
| H  | -0.5125250 | 5.8664760  | -0.4797860 |
| H  | -2.7228170 | 4.7922160  | 0.0958150  |
| C  | 3.7386390  | -0.3447800 | 0.3115020  |
| C  | 4.3630650  | -1.0732860 | -0.7135860 |
| C  | 4.5022910  | 0.5764410  | 1.0451720  |
| C  | 5.7109160  | -0.8664100 | -1.0162160 |
| H  | 3.7962040  | -1.8211440 | -1.2727610 |
| C  | 5.8506360  | 0.7849900  | 0.7453200  |
| H  | 4.0428440  | 1.1291370  | 1.8681520  |
| C  | 6.4563720  | 0.0680980  | -0.2908710 |
| H  | 6.1819590  | -1.4425270 | -1.8157520 |
| H  | 6.4308820  | 1.5045330  | 1.3272350  |
| H  | 7.5110840  | 0.2289860  | -0.5253560 |
| N  | -2.6975150 | -0.1392920 | 0.3377570  |
| N  | -0.5294650 | -1.9682800 | 0.3944360  |
| N  | -0.7562690 | 2.0580790  | 0.1426870  |
| Mn | -0.6826260 | 0.0497260  | 0.3528420  |
| O  | -0.5293510 | 0.0976570  | 2.1626520  |
| O  | 0.2251260  | 1.2099930  | 2.6707020  |
| H  | 0.6724970  | 0.7972230  | 3.4296260  |

65

Triplet\_MnBnTPEN\_Hydroperoxo\_G2.log

65

Final Energy = -2620.8687141800

|   |           |            |            |
|---|-----------|------------|------------|
| C | 3.2821280 | 0.0193410  | 0.8719870  |
| C | 3.4366260 | -0.4148340 | -1.4227870 |
| C | 4.8207660 | -0.5349130 | -1.3433710 |
| C | 5.4407100 | -0.3725790 | -0.1024970 |
| C | 4.6605980 | -0.0965260 | 1.0233440  |
| H | 2.8879520 | -0.5238210 | -2.3599580 |
| H | 5.3971600 | -0.7557460 | -2.2421330 |
| H | 6.5240100 | -0.4672340 | -0.0085660 |
| H | 5.1103280 | 0.0248950  | 2.0093600  |

|    |            |            |            |
|----|------------|------------|------------|
| C  | 2.3314240  | 0.3512840  | 1.9946140  |
| H  | 2.1840280  | 1.4393000  | 2.0489760  |
| H  | 2.7253630  | 0.0299360  | 2.9701810  |
| N  | 1.0270000  | -0.2905360 | 1.6937070  |
| C  | -0.1362580 | 0.3299610  | 2.3776860  |
| H  | -0.1927590 | 0.0082740  | 3.4293280  |
| H  | 0.0012910  | 1.4178850  | 2.3788040  |
| C  | -1.3990320 | -0.0701420 | 1.6390250  |
| H  | -1.5326950 | -1.1580650 | 1.6951360  |
| H  | -2.2807790 | 0.3860830  | 2.1118800  |
| N  | -1.3304590 | 0.2987040  | 0.1904150  |
| C  | 1.1126190  | -1.7612620 | 1.9526290  |
| H  | 0.5468760  | -2.0191670 | 2.8597840  |
| H  | 2.1602190  | -2.0180770 | 2.1669440  |
| C  | 0.6701420  | -2.5980850 | 0.7858680  |
| C  | 0.4822400  | -3.9760600 | 0.9012610  |
| C  | 0.1696540  | -4.7124070 | -0.2394320 |
| H  | 0.5893720  | -4.4563430 | 1.8747000  |
| C  | 0.2384160  | -2.6747260 | -1.5040150 |
| C  | 0.0567900  | -4.0508490 | -1.4657530 |
| H  | 0.0187880  | -5.7914120 | -0.1739180 |
| H  | 0.1432960  | -2.0942640 | -2.4220710 |
| H  | -0.1787480 | -4.5898730 | -2.3837520 |
| C  | -1.6413930 | 1.7391340  | -0.0181230 |
| H  | -2.4589090 | 2.0677590  | 0.6384540  |
| H  | -1.9828400 | 1.8517100  | -1.0557510 |
| C  | -2.2743270 | -0.5489480 | -0.6213570 |
| H  | -1.9967070 | -1.5927050 | -0.4420980 |
| H  | -2.0644990 | -0.3163000 | -1.6715030 |
| C  | -0.4404520 | 2.6264730  | 0.1101970  |
| C  | -0.5582250 | 3.9948060  | 0.3528940  |
| C  | 1.8561280  | 2.8312360  | -0.2306500 |
| C  | 0.5823470  | 4.7932150  | 0.2933710  |
| H  | -1.5373490 | 4.4212820  | 0.5733080  |
| C  | 1.8098810  | 4.2027190  | -0.0196290 |
| H  | 2.7937330  | 2.3324300  | -0.4721480 |
| H  | 0.5140880  | 5.8664120  | 0.4802620  |
| H  | 2.7241510  | 4.7915750  | -0.0951510 |
| C  | -3.7387220 | -0.3442610 | -0.3117020 |
| C  | -4.3629850 | -1.0737660 | 0.7127730  |
| C  | -4.5024900 | 0.5777110  | -1.0443070 |
| C  | -5.7107820 | -0.8671860 | 1.0158470  |
| H  | -3.7960160 | -1.8221620 | 1.2711250  |
| C  | -5.8507780 | 0.7859780  | -0.7440050 |
| H  | -4.0432070 | 1.1312290  | -1.8668180 |
| C  | -6.4563510 | 0.0680560  | 0.2915690  |
| H  | -6.1816860 | -1.4440950 | 1.8148940  |
| H  | -6.4311090 | 1.5061140  | -1.3251010 |
| H  | -7.5110210 | 0.2287220  | 0.5263940  |
| N  | 2.6974840  | -0.1397760 | -0.3375370 |
| N  | 0.5290540  | -1.9682760 | -0.3944450 |
| N  | 0.7567380  | 2.0580780  | -0.1430200 |
| Mn | 0.6826520  | 0.0496840  | -0.3529960 |
| O  | 0.5297390  | 0.0974830  | -2.1628330 |

|   |            |           |            |
|---|------------|-----------|------------|
| O | -0.2244360 | 1.2098820 | -2.6711720 |
| H | -0.6718260 | 0.7970640 | -3.4300580 |

65

Triplet\_MnBnTPEN\_Hydroperoxo\_G3.log

65

|                |            |                  |            |
|----------------|------------|------------------|------------|
| Final Energy = |            | -2620.8614712300 |            |
| C              | -3.2301170 | -0.3508450       | -0.0657080 |
| C              | -2.4575660 | 0.3613010        | -2.1542970 |
| C              | -3.7573300 | 0.4503300        | -2.6444150 |
| C              | -4.8206530 | 0.1314010        | -1.7988210 |
| C              | -4.5532340 | -0.2701740       | -0.4876020 |
| H              | -1.5892170 | 0.5890910        | -2.7711310 |
| H              | -3.9245270 | 0.7720760        | -3.6726460 |
| H              | -5.8509020 | 0.2006630        | -2.1523850 |
| H              | -5.3586660 | -0.5163750       | 0.2049140  |
| C              | -2.8080560 | -0.8132380       | 1.3035300  |
| H              | -2.5901610 | -1.8906650       | 1.2783030  |
| H              | -3.6029110 | -0.6650340       | 2.0491390  |
| N              | -1.5656480 | -0.0941970       | 1.6812130  |
| C              | -0.7481980 | -0.8061740       | 2.6969970  |
| H              | -1.1810270 | -0.6896750       | 3.7030130  |
| H              | -0.7577600 | -1.8765280       | 2.4626230  |
| C              | 0.6530900  | -0.2304950       | 2.6652330  |
| H              | 0.6222930  | 0.8214440        | 2.9791610  |
| H              | 1.3022960  | -0.7564730       | 3.3820710  |
| N              | 1.2687870  | -0.2629610       | 1.2977000  |
| C              | -1.8744070 | 1.3073270        | 2.1049430  |
| H              | -1.5713130 | 1.4546320        | 3.1513970  |
| H              | -2.9638730 | 1.4554090        | 2.0878660  |
| C              | -1.2432680 | 2.3515180        | 1.2261470  |
| C              | -1.4105100 | 3.7144380        | 1.4806270  |
| C              | -0.8741420 | 4.6400290        | 0.5889860  |
| H              | -1.9662650 | 4.0353180        | 2.3627440  |
| C              | -0.0599250 | 2.8092310        | -0.7275670 |
| C              | -0.1986010 | 4.1780740        | -0.5447080 |
| H              | -0.9930180 | 5.7100920        | 0.7681050  |
| H              | 0.4421740  | 2.3823640        | -1.5954130 |
| H              | 0.2171110  | 4.8661930        | -1.2811260 |
| C              | 1.8501030  | -1.5934970       | 1.0015520  |
| H              | 2.4225260  | -1.9790260       | 1.8597630  |
| H              | 2.5574500  | -1.4665170       | 0.1699230  |
| C              | 2.3452220  | 0.8114560        | 1.3049770  |
| H              | 2.8263110  | 0.7656610        | 2.2944410  |
| H              | 1.8207750  | 1.7723910        | 1.2427610  |
| C              | 0.8357840  | -2.5935550       | 0.5381210  |
| C              | 1.0448540  | -3.9683920       | 0.6474020  |
| C              | -1.1202120 | -2.9345780       | -0.6823930 |
| C              | 0.1302080  | -4.8399120       | 0.0588240  |
| H              | 1.9205800  | -4.3416220       | 1.1793020  |
| C              | -0.9650140 | -4.3132260       | -0.6312800 |
| H              | -1.9603380 | -2.4836700       | -1.2086580 |
| H              | 0.2733320  | -5.9195710       | 0.1314780  |
| H              | -1.6959810 | -4.9577120       | -1.1197670 |
| C              | 3.4251040  | 0.7246470        | 0.2567760  |

|    |            |            |            |
|----|------------|------------|------------|
| C  | 3.3241130  | 1.4114540  | -0.9606170 |
| C  | 4.5940780  | -0.0122020 | 0.5158490  |
| C  | 4.3468210  | 1.3405820  | -1.9089570 |
| H  | 2.4434690  | 2.0147510  | -1.1666690 |
| C  | 5.6166120  | -0.0909770 | -0.4315100 |
| H  | 4.7068510  | -0.5294780 | 1.4719950  |
| C  | 5.4922520  | 0.5821150  | -1.6508820 |
| H  | 4.2494640  | 1.8845760  | -2.8511500 |
| H  | 6.5153400  | -0.6720330 | -0.2132570 |
| H  | 6.2918410  | 0.5251790  | -2.3930850 |
| N  | -2.2090860 | -0.0368760 | -0.8967310 |
| N  | -0.5514660 | 1.9200990  | 0.1569990  |
| N  | -0.2481440 | -2.0968050 | -0.0904880 |
| Mn | -0.3806290 | -0.0832730 | -0.0577690 |
| O  | 0.6429630  | 0.1063480  | -1.5374640 |
| O  | 0.3679540  | -0.8575190 | -2.5649420 |
| H  | 0.7394040  | -0.3989200 | -3.3383260 |

68

Triplet\_MnBnTPEN\_MeCN\_G2.log

68

|                |            |                  |            |
|----------------|------------|------------------|------------|
| Final Energy = |            | -2602.5164252900 |            |
| C              | -3.2829800 | -0.1091720       | -1.0188360 |
| C              | -3.4485870 | -0.3709620       | 1.3071950  |
| C              | -4.8304760 | -0.4951520       | 1.2284930  |
| C              | -5.4443460 | -0.4227770       | -0.0236430 |
| C              | -4.6594680 | -0.2325400       | -1.1636740 |
| H              | -2.9262350 | -0.4235510       | 2.2622490  |
| H              | -5.4093760 | -0.6492430       | 2.1391350  |
| H              | -6.5272860 | -0.5223090       | -0.1147760 |
| H              | -5.1040950 | -0.1849300       | -2.1580520 |
| C              | -2.3349480 | 0.1372420        | -2.1594280 |
| H              | -2.2048110 | 1.2172450        | -2.3154270 |
| H              | -2.7109050 | -0.2809660       | -3.1038620 |
| N              | -1.0209270 | -0.4532920       | -1.7915240 |
| C              | 0.1271330  | 0.1513510        | -2.5293130 |
| H              | 0.1705160  | -0.2394070       | -3.5568680 |
| H              | -0.0388550 | 1.2325070        | -2.5995300 |
| C              | 1.4025880  | -0.1745220       | -1.7828750 |
| H              | 1.5776850  | -1.2571510       | -1.7969400 |
| H              | 2.2665140  | 0.2991090        | -2.2689790 |
| N              | 1.3171770  | 0.2455580        | -0.3433540 |
| C              | -1.0717010 | -1.9440580       | -1.9543960 |
| H              | -0.5382600 | -2.2421030       | -2.8674140 |
| H              | -2.1208080 | -2.2412690       | -2.0996340 |
| C              | -0.5597200 | -2.6791330       | -0.7529310 |
| C              | -0.2749930 | -4.0426700       | -0.7845760 |
| C              | 0.0784280  | -4.6853150       | 0.4007220  |
| H              | -0.3405520 | -4.5876570       | -1.7267520 |
| C              | -0.1389690 | -2.5909070       | 1.5467760  |
| C              | 0.1337080  | -3.9497970       | 1.5885380  |
| H              | 0.3049080  | -5.7528740       | 0.3993450  |
| H              | -0.0868120 | -1.9748370       | 2.4427190  |
| H              | 0.3965790  | -4.4171700       | 2.5374130  |
| C              | 1.6174470  | 1.6961630        | -0.1738750 |

|    |            |            |            |
|----|------------|------------|------------|
| H  | 2.4557960  | 1.9968540  | -0.8164050 |
| H  | 1.9439000  | 1.8484040  | 0.8650250  |
| C  | 2.2813190  | -0.5676360 | 0.4962720  |
| H  | 2.0479380  | -1.6207740 | 0.3133570  |
| H  | 2.0550880  | -0.3425610 | 1.5452100  |
| C  | 0.4190890  | 2.5689980  | -0.3850870 |
| C  | 0.5360440  | 3.9262220  | -0.6784220 |
| C  | -1.8959420 | 2.7635720  | -0.1560350 |
| C  | -0.6126460 | 4.7145990  | -0.7031640 |
| H  | 1.5209640  | 4.3518530  | -0.8720560 |
| C  | -1.8477840 | 4.1244770  | -0.4220610 |
| H  | -2.8406600 | 2.2706720  | 0.0647540  |
| H  | -0.5450070 | 5.7796820  | -0.9308200 |
| H  | -2.7699630 | 4.7054140  | -0.4123030 |
| C  | 3.7385290  | -0.3025390 | 0.2031380  |
| C  | 4.4588420  | 0.6327520  | 0.9624900  |
| C  | 4.3985190  | -0.9905980 | -0.8276940 |
| C  | 5.8009640  | 0.8963740  | 0.6804130  |
| H  | 3.9720390  | 1.1529450  | 1.7910350  |
| C  | 5.7402100  | -0.7274360 | -1.1119070 |
| H  | 3.8678830  | -1.7504460 | -1.4051910 |
| C  | 6.4422520  | 0.2215020  | -0.3624680 |
| H  | 6.3481970  | 1.6258850  | 1.2812380  |
| H  | 6.2405180  | -1.2713290 | -1.9159660 |
| H  | 7.4921390  | 0.4262220  | -0.5835010 |
| N  | -2.7001890 | -0.1746450 | 0.2061510  |
| N  | -0.4664730 | -1.9711560 | 0.3930020  |
| N  | -0.7845280 | 1.9991010  | -0.1602280 |
| Mn | -0.7036380 | -0.0037620 | 0.1669080  |
| N  | -0.4441690 | 0.4440200  | 2.0746680  |
| C  | -0.3078720 | 0.8289920  | 3.1558010  |
| C  | -0.1271000 | 1.3007140  | 4.5086580  |
| H  | -0.7504060 | 2.1915120  | 4.6752030  |
| H  | -0.4194910 | 0.5063700  | 5.2116310  |
| H  | 0.9323210  | 1.5543890  | 4.6637580  |

63

Triplet\_MnBnTPEN\_Oxo\_G1.log

63

Final Energy = -2544.9006074300

|   |           |            |            |
|---|-----------|------------|------------|
| C | 2.6303430 | 1.3627860  | -0.3437130 |
| C | 1.9140400 | 0.3187580  | -2.3307920 |
| C | 3.0648280 | 0.7217920  | -2.9970890 |
| C | 4.0220860 | 1.4623400  | -2.2999270 |
| C | 3.8038250 | 1.7846000  | -0.9574820 |
| H | 1.1253230 | -0.2585450 | -2.8151230 |
| H | 3.2018450 | 0.4531660  | -4.0445180 |
| H | 4.9386510 | 1.7852760  | -2.7964630 |
| H | 4.5353650 | 2.3565520  | -0.3860740 |
| C | 2.2528260 | 1.6934770  | 1.0768790  |
| H | 1.6464350 | 2.6105980  | 1.0938200  |
| H | 3.1419950 | 1.8840700  | 1.6945580  |
| N | 1.4422140 | 0.5732370  | 1.6135410  |
| C | 0.5454810 | 0.9223380  | 2.7465020  |
| H | 1.1039400 | 0.9683010  | 3.6932890  |



|    |            |            |            |
|----|------------|------------|------------|
| H  | 0.1236680  | 1.9200800  | 2.5766260  |
| C  | -0.5280710 | -0.1452100 | 2.8143300  |
| H  | -0.0863780 | -1.1369260 | 2.9765230  |
| H  | -1.2222140 | 0.0384250  | 3.6463290  |
| N  | -1.2929010 | -0.1904450 | 1.5206060  |
| C  | 2.3186620  | -0.5791610 | 1.9834220  |
| H  | 2.2350510  | -0.7864730 | 3.0592150  |
| H  | 3.3687980  | -0.2996850 | 1.8165180  |
| C  | 2.0412910  | -1.8128230 | 1.1829860  |
| C  | 2.7578270  | -2.9907840 | 1.3947190  |
| C  | 2.5820930  | -4.0592450 | 0.5204430  |
| H  | 3.4634100  | -3.0462500 | 2.2244870  |
| C  | 1.0212480  | -2.7220370 | -0.7107880 |
| C  | 1.7189980  | -3.9096710 | -0.5704320 |
| H  | 3.1349360  | -4.9884710 | 0.6682950  |
| H  | 0.3716390  | -2.5378830 | -1.5629380 |
| H  | 1.5882860  | -4.6989240 | -1.3106810 |
| C  | -2.2289870 | 0.9758100  | 1.4496770  |
| H  | -2.5833370 | 1.2333420  | 2.4575330  |
| H  | -3.1108040 | 0.6761930  | 0.8710110  |
| C  | -2.0837270 | -1.4829010 | 1.4498710  |
| H  | -2.7495290 | -1.5112060 | 2.3249730  |
| H  | -1.3642590 | -2.3063870 | 1.5426320  |
| C  | -1.6575070 | 2.1551420  | 0.7382530  |
| C  | -2.2362310 | 3.4199040  | 0.8356110  |
| C  | -0.1936960 | 2.8943810  | -0.9215150 |
| C  | -1.7663570 | 4.4433170  | 0.0171620  |
| H  | -3.0548090 | 3.5838810  | 1.5370870  |
| C  | -0.7395130 | 4.1684420  | -0.8900880 |
| H  | 0.6075460  | 2.6525640  | -1.6145110 |
| H  | -2.2038140 | 5.4412650  | 0.0762570  |
| H  | -0.3542010 | 4.9305400  | -1.5673190 |
| C  | -2.8736770 | -1.5837690 | 0.1789220  |
| C  | -4.2102780 | -1.2238820 | 0.1025510  |
| C  | -2.1984840 | -1.9922890 | -1.0191350 |
| C  | -4.8722980 | -1.2058720 | -1.1413520 |
| H  | -4.7586480 | -0.9446790 | 1.0043810  |
| C  | -2.8818750 | -1.9641190 | -2.2751930 |
| H  | -1.3756840 | -2.6945400 | -0.9099490 |
| C  | -4.1982990 | -1.5577300 | -2.3308270 |
| H  | -5.9204880 | -0.9040010 | -1.1829430 |
| H  | -2.3493800 | -2.2875200 | -3.1707630 |
| H  | -4.7312440 | -1.5358730 | -3.2825440 |
| N  | 1.7172040  | 0.6389770  | -1.0395030 |
| N  | 1.1414470  | -1.7153130 | 0.1834140  |
| N  | -0.6290900 | 1.9144620  | -0.1003900 |
| Mn | 0.1252820  | 0.0229580  | 0.0035760  |
| O  | -0.8166950 | -0.5348530 | -1.2713480 |

63

Triplet\_MnBnTPEN\_Oxo\_G2.log

63

Final Energy = -2544.9006072200

|   |           |           |            |
|---|-----------|-----------|------------|
| C | 2.6305860 | 1.3625510 | -0.3436870 |
| C | 1.9141460 | 0.3187780 | -2.3308630 |

|   |            |            |            |
|---|------------|------------|------------|
| C | 3.0650620  | 0.7215820  | -2.9970740 |
| C | 4.0224400  | 1.4618920  | -2.2998290 |
| C | 3.8041810  | 1.7841460  | -0.9573790 |
| H | 1.1253200  | -0.2583320 | -2.8152440 |
| H | 3.2020700  | 0.4530030  | -4.0445170 |
| H | 4.9391120  | 1.7846240  | -2.7963010 |
| H | 4.5358070  | 2.3559320  | -0.3859100 |
| C | 2.2530580  | 1.6932710  | 1.0768980  |
| H | 1.6466470  | 2.6103860  | 1.0938000  |
| H | 3.1422180  | 1.8838640  | 1.6945890  |
| N | 1.4424190  | 0.5730540  | 1.6135410  |
| C | 0.5457390  | 0.9221020  | 2.7465420  |
| H | 1.1041920  | 0.9678260  | 3.6933450  |
| H | 0.1241060  | 1.9199540  | 2.5768460  |
| C | -0.5279980 | -0.1452840 | 2.8142560  |
| H | -0.0864650 | -1.1370790 | 2.9763940  |
| H | -1.2221060 | 0.0384070  | 3.6462750  |
| N | -1.2928850 | -0.1903990 | 1.5205530  |
| C | 2.3187970  | -0.5794450 | 1.9832490  |
| H | 2.2354710  | -0.7866660 | 3.0590800  |
| H | 3.3689300  | -0.3001410 | 1.8160190  |
| C | 2.0410310  | -1.8131050 | 1.1829510  |
| C | 2.7571450  | -2.9913010 | 1.3948030  |
| C | 2.5811480  | -4.0597250 | 0.5205330  |
| H | 3.4626240  | -3.0469930 | 2.2246460  |
| C | 1.0209340  | -2.7220200 | -0.7109500 |
| C | 1.7182620  | -3.9098890 | -0.5704750 |
| H | 3.1336560  | -4.9891350 | 0.6684870  |
| H | 0.3715240  | -2.5376420 | -1.5632090 |
| H | 1.5873790  | -4.6991200 | -1.3107160 |
| C | -2.2288670 | 0.9759480  | 1.4497630  |
| H | -2.5830680 | 1.2334480  | 2.4576780  |
| H | -3.1107700 | 0.6764520  | 0.8711770  |
| C | -2.0837620 | -1.4827640 | 1.4497900  |
| H | -2.7495590 | -1.5110910 | 2.3249010  |
| H | -1.3643760 | -2.3063370 | 1.5424940  |
| C | -1.6573620 | 2.1552570  | 0.7383280  |
| C | -2.2360850 | 3.4200260  | 0.8356500  |
| C | -0.1933750 | 2.8945260  | -0.9212810 |
| C | -1.7661260 | 4.4434470  | 0.0172650  |
| H | -3.0547340 | 3.5840000  | 1.5370490  |
| C | -0.7391680 | 4.1685970  | -0.8898660 |
| H | 0.6079570  | 2.6527230  | -1.6141710 |
| H | -2.2035820 | 5.4413970  | 0.0763410  |
| H | -0.3537610 | 4.9307130  | -1.5670220 |
| C | -2.8738270 | -1.5835720 | 0.1788660  |
| C | -2.1988120 | -1.9921710 | -1.0192360 |
| C | -4.2103810 | -1.2234920 | 0.1025740  |
| C | -2.8822200 | -1.9638530 | -2.2752390 |
| H | -1.3758810 | -2.6942720 | -0.9101660 |
| C | -4.8724730 | -1.2053610 | -1.1412920 |
| H | -4.7586550 | -0.9441760 | 1.0044250  |
| C | -4.1985960 | -1.5572720 | -2.3308080 |
| H | -2.3497920 | -2.2872740 | -3.1708410 |

|    |            |            |            |
|----|------------|------------|------------|
| H  | -5.9206230 | -0.9033420 | -1.1828100 |
| H  | -4.7315890 | -1.5352910 | -3.2824960 |
| N  | 1.7173130  | 0.6389750  | -1.0395660 |
| N  | 1.1413370  | -1.7153390 | 0.1832670  |
| N  | -0.6288970 | 1.9145830  | -0.1002450 |
| Mn | 0.1253850  | 0.0230640  | 0.0034990  |
| O  | -0.8165690 | -0.5344720 | -1.2714270 |

63

Triplet\_MnBnTPEN\_Oxo\_G3.log

63

Final Energy = -2544.8917261600

|   |            |            |            |
|---|------------|------------|------------|
| C | 3.2517060  | -0.0077210 | 0.7838250  |
| C | 3.3845270  | -0.5329300 | -1.5163320 |
| C | 4.7598770  | -0.6967550 | -1.4274560 |
| C | 5.3875110  | -0.5079320 | -0.1939650 |
| C | 4.6237280  | -0.1640060 | 0.9251280  |
| H | 2.8473320  | -0.6638230 | -2.4557650 |
| H | 5.3234620  | -0.9688170 | -2.3199450 |
| H | 6.4673020  | -0.6343040 | -0.0998270 |
| H | 5.0818310  | -0.0206840 | 1.9040610  |
| C | 2.3234160  | 0.3964600  | 1.8931360  |
| H | 2.2293830  | 1.4906150  | 1.9290840  |
| H | 2.6996300  | 0.0762160  | 2.8743710  |
| N | 0.9920800  | -0.1987020 | 1.6048340  |
| C | -0.1426910 | 0.5122760  | 2.2561200  |
| H | -0.2130650 | 0.2438940  | 3.3206940  |
| H | 0.0446430  | 1.5906510  | 2.2061820  |
| C | -1.4128380 | 0.1245810  | 1.5329280  |
| H | -1.6134100 | -0.9458220 | 1.6577790  |
| H | -2.2770450 | 0.6669490  | 1.9377450  |
| N | -1.3004190 | 0.3865750  | 0.0541500  |
| C | 1.0079060  | -1.6578850 | 1.9414400  |
| H | 0.4314320  | -1.8415630 | 2.8588680  |
| H | 2.0417720  | -1.9572200 | 2.1676250  |
| C | 0.5256300  | -2.5174130 | 0.8150440  |
| C | 0.2518870  | -3.8728980 | 0.9799220  |
| C | -0.0761550 | -4.6390810 | -0.1373190 |
| H | 0.3112830  | -4.3152770 | 1.9748570  |
| C | 0.1350200  | -2.6758430 | -1.4983100 |
| C | -0.1215340 | -4.0330030 | -1.3973080 |
| H | -0.2907810 | -5.7034200 | -0.0279380 |
| H | 0.0917340  | -2.1471280 | -2.4501540 |
| H | -0.3646400 | -4.5997540 | -2.2959860 |
| C | -1.5475190 | 1.8229950  | -0.2850240 |
| H | -2.3946740 | 2.2052570  | 0.2980630  |
| H | -1.8284260 | 1.8692130  | -1.3465990 |
| C | -2.2654730 | -0.4969480 | -0.7292070 |
| H | -2.0120500 | -1.5313230 | -0.4839410 |
| H | -2.0450120 | -0.3224670 | -1.7914760 |
| C | -0.3306980 | 2.6718900  | -0.1207950 |
| C | -0.3999180 | 4.0465200  | 0.0816770  |
| C | 1.9946860  | 2.7726110  | -0.3724850 |
| C | 0.7757340  | 4.7958970  | 0.0476890  |
| H | -1.3689880 | 4.5164860  | 0.2505280  |

|    |            |            |            |
|----|------------|------------|------------|
| C  | 1.9883480  | 4.1495870  | -0.2012680 |
| H  | 2.9232350  | 2.2403200  | -0.5659690 |
| H  | 0.7438950  | 5.8753590  | 0.2036290  |
| H  | 2.9290180  | 4.6970450  | -0.2584370 |
| C  | -3.7122040 | -0.2320220 | -0.4165380 |
| C  | -4.3619740 | -0.9665990 | 0.5914410  |
| C  | -4.4398880 | 0.7335290  | -1.1356590 |
| C  | -5.7004950 | -0.7209130 | 0.8940640  |
| H  | -3.8221610 | -1.7460950 | 1.1334040  |
| C  | -5.7794370 | 0.9766000  | -0.8352790 |
| H  | -3.9644980 | 1.2843610  | -1.9497060 |
| C  | -6.4099500 | 0.2561460  | 0.1856490  |
| H  | -6.1949250 | -1.2977500 | 1.6780460  |
| H  | -6.3361810 | 1.7237070  | -1.4042060 |
| H  | -7.4590230 | 0.4474480  | 0.4211800  |
| N  | 2.6620350  | -0.1900470 | -0.4287870 |
| N  | 0.4401840  | -1.9404680 | -0.4040300 |
| N  | 0.8568980  | 2.0513270  | -0.3064140 |
| Mn | 0.6909880  | 0.0368070  | -0.4882160 |
| O  | 0.3666970  | 0.1080120  | -2.0957180 |

64

Triplet\_MnBnTPEN\_Peroxide\_Mn3\_G1.log

64

Final Energy = -2620.3908182000

|   |            |            |            |
|---|------------|------------|------------|
| C | 3.3037900  | 0.1210120  | 1.0603340  |
| C | 3.7679700  | -0.5326650 | -1.1126930 |
| C | 5.1312210  | -0.6385100 | -0.8392540 |
| C | 5.5790920  | -0.3405270 | 0.4505900  |
| C | 4.6504820  | 0.0384610  | 1.4215190  |
| H | 3.3486150  | -0.7595700 | -2.0955160 |
| H | 5.8239320  | -0.9534130 | -1.6211320 |
| H | 6.6393180  | -0.4148310 | 0.7014930  |
| H | 4.9590510  | 0.2594890  | 2.4448400  |
| C | 2.2132880  | 0.5233440  | 2.0211230  |
| H | 2.0609470  | 1.6122090  | 1.9629470  |
| H | 2.5047070  | 0.2979600  | 3.0619270  |
| N | 0.9542270  | -0.1372180 | 1.6474360  |
| C | -0.2065750 | 0.5044770  | 2.2827500  |
| H | -0.2675970 | 0.2561130  | 3.3578890  |
| H | -0.0741990 | 1.5925190  | 2.2160750  |
| C | -1.4852660 | 0.0765180  | 1.5935590  |
| H | -1.6244600 | -1.0048430 | 1.7254960  |
| H | -2.3504390 | 0.5669810  | 2.0686030  |
| N | -1.4470880 | 0.3464290  | 0.1404960  |
| C | 1.0207420  | -1.5945820 | 1.9041710  |
| H | 0.4220910  | -1.8606420 | 2.7907210  |
| H | 2.0578480  | -1.8591430 | 2.1619210  |
| C | 0.6261590  | -2.4756620 | 0.7403940  |
| C | 0.4339410  | -3.8476940 | 0.9265020  |
| C | 0.1657220  | -4.6559000 | -0.1767400 |
| H | 0.5022050  | -4.2699960 | 1.9303760  |
| C | 0.2889870  | -2.6991670 | -1.5578690 |
| C | 0.1027940  | -4.0713620 | -1.4450680 |
| H | 0.0112020  | -5.7291520 | -0.0495920 |

|    |            |            |            |
|----|------------|------------|------------|
| H  | 0.2414540  | -2.1709570 | -2.5101990 |
| H  | -0.0945110 | -4.6673860 | -2.3369480 |
| C  | -1.7217830 | 1.7651110  | -0.1820800 |
| H  | -2.5343360 | 2.1761370  | 0.4372410  |
| H  | -2.0620810 | 1.7983350  | -1.2274850 |
| C  | -2.3938990 | -0.5555470 | -0.5887470 |
| H  | -2.0930340 | -1.5840310 | -0.3540130 |
| H  | -2.2185490 | -0.4008580 | -1.6599110 |
| C  | -0.5046410 | 2.6491340  | -0.1209450 |
| C  | -0.5844920 | 4.0111420  | 0.1710190  |
| C  | 1.7719200  | 2.8297990  | -0.5906530 |
| C  | 0.5670050  | 4.7937710  | 0.0720080  |
| H  | -1.5397410 | 4.4472380  | 0.4662060  |
| C  | 1.7649950  | 4.1960880  | -0.3266420 |
| H  | 2.6773540  | 2.3079440  | -0.9006460 |
| H  | 0.5281230  | 5.8608090  | 0.2997150  |
| H  | 2.6838820  | 4.7743090  | -0.4290260 |
| C  | -3.8550600 | -0.3563080 | -0.2501900 |
| C  | -4.4502390 | -1.0588010 | 0.8100010  |
| C  | -4.6452980 | 0.5422130  | -0.9845120 |
| C  | -5.7913660 | -0.8524520 | 1.1430730  |
| H  | -3.8621070 | -1.7853920 | 1.3756480  |
| C  | -5.9867580 | 0.7522320  | -0.6545320 |
| H  | -4.2106330 | 1.0772930  | -1.8322310 |
| C  | -6.5621520 | 0.0587500  | 0.4145010  |
| H  | -6.2373660 | -1.4098540 | 1.9700970  |
| H  | -6.5859260 | 1.4545860  | -1.2387090 |
| H  | -7.6114240 | 0.2201000  | 0.6725250  |
| N  | 2.8850970  | -0.1511550 | -0.1816280 |
| N  | 0.5306390  | -1.9234260 | -0.4836160 |
| N  | 0.6659450  | 2.0784760  | -0.4697940 |
| Mn | 0.6075690  | 0.0729770  | -0.6618480 |
| O  | 1.2871850  | 0.0807190  | -2.4976130 |
| O  | -0.1132800 | 0.1386060  | -2.3151460 |

64

Triplet\_MnBnTPEN\_Peroxide\_Mn3\_G2.log

64

Final Energy = -2620.3908182700

|   |            |            |            |
|---|------------|------------|------------|
| C | 3.3031800  | 0.1215350  | 1.0604020  |
| C | 3.7669240  | -0.5319760 | -1.1127850 |
| C | 5.1301870  | -0.6381300 | -0.8395340 |
| C | 5.5783140  | -0.3403850 | 0.4502600  |
| C | 4.6498960  | 0.0386700  | 1.4213490  |
| H | 3.3474220  | -0.7587100 | -2.0955730 |
| H | 5.8226930  | -0.9531180 | -1.6215590 |
| H | 6.6385550  | -0.4149270 | 0.7010240  |
| H | 4.9586410  | 0.2594960  | 2.4446590  |
| C | 2.2128890  | 0.5237540  | 2.0214620  |
| H | 2.0603110  | 1.6125840  | 1.9632260  |
| H | 2.5046830  | 0.2985030  | 3.0621940  |
| N | 0.9539410  | -0.1370740 | 1.6480800  |
| C | -0.2070400 | 0.5044620  | 2.2831180  |
| H | -0.2682510 | 0.2562460  | 3.3582840  |
| H | -0.0748420 | 1.5925250  | 2.2163280  |

|    |            |            |            |
|----|------------|------------|------------|
| C  | -1.4854750 | 0.0762070  | 1.5936520  |
| H  | -1.6243660 | -1.0052130 | 1.7254410  |
| H  | -2.3509060 | 0.5663670  | 2.0685260  |
| N  | -1.4470590 | 0.3462240  | 0.1406020  |
| C  | 1.0206220  | -1.5944030 | 1.9046620  |
| H  | 0.4214000  | -1.8607080 | 2.7907590  |
| H  | 2.0575840  | -1.8588070 | 2.1631590  |
| C  | 0.6269390  | -2.4755320 | 0.7405710  |
| C  | 0.4355850  | -3.8477080 | 0.9265220  |
| C  | 0.1678850  | -4.6559950 | -0.1767800 |
| H  | 0.5041060  | -4.2700450 | 1.9303660  |
| C  | 0.2900080  | -2.6990690 | -1.5577300 |
| C  | 0.1046060  | -4.0713710 | -1.4450510 |
| H  | 0.0140370  | -5.7293550 | -0.0497300 |
| H  | 0.2422840  | -2.1708320 | -2.5100340 |
| H  | -0.0923210 | -4.6674210 | -2.3369980 |
| C  | -1.7218700 | 1.7649020  | -0.1818340 |
| H  | -2.5344750 | 2.1758070  | 0.4375020  |
| H  | -2.0621710 | 1.7982370  | -1.2272390 |
| C  | -2.3937210 | -0.5557850 | -0.5887980 |
| H  | -2.0927140 | -1.5842510 | -0.3541520 |
| H  | -2.2183150 | -0.4009830 | -1.6599330 |
| C  | -0.5048250 | 2.6490540  | -0.1206640 |
| C  | -0.5847860 | 4.0110200  | 0.1715100  |
| C  | 1.7715920  | 2.8300910  | -0.5909600 |
| C  | 0.5665770  | 4.7938060  | 0.0722690  |
| H  | -1.5400120 | 4.4469480  | 0.4670120  |
| C  | 1.7645370  | 4.1963530  | -0.3268350 |
| H  | 2.6770000  | 2.3083790  | -0.9012530 |
| H  | 0.5276260  | 5.8608090  | 0.3001360  |
| H  | 2.6832900  | 4.7747420  | -0.4294690 |
| C  | -3.8549280 | -0.3567580 | -0.2503410 |
| C  | -4.4501270 | -1.0593930 | 0.8097500  |
| C  | -4.6452280 | 0.5416830  | -0.9846960 |
| C  | -5.7913120 | -0.8532380 | 1.1427060  |
| H  | -3.8619510 | -1.7859360 | 1.3754110  |
| C  | -5.9867460 | 0.7515150  | -0.6548290 |
| H  | -4.2105620 | 1.0768550  | -1.8323560 |
| C  | -6.5621500 | 0.0579070  | 0.4141170  |
| H  | -6.2373160 | -1.4107470 | 1.9696560  |
| H  | -6.5859490 | 1.4538160  | -1.2390320 |
| H  | -7.6114680 | 0.2191000  | 0.6720480  |
| N  | 2.8842200  | -0.1503570 | -0.1815690 |
| N  | 0.5311610  | -1.9232400 | -0.4833990 |
| N  | 0.6657490  | 2.0786050  | -0.4698250 |
| Mn | 0.6077990  | 0.0730970  | -0.6620150 |
| O  | 1.2868570  | 0.0810460  | -2.4978680 |
| O  | -0.1136400 | 0.1385580  | -2.3151710 |

6

Methanol.log

6

Final Energy = -115.7676644360

|   |           |            |           |
|---|-----------|------------|-----------|
| C | 0.6570980 | -0.0191380 | 0.0000010 |
|---|-----------|------------|-----------|

|   |            |            |            |
|---|------------|------------|------------|
| H | 1.0969670  | 0.9904910  | -0.0007480 |
| H | 1.0376680  | -0.5498310 | -0.8946250 |
| H | 1.0378020  | -0.5485630 | 0.8953310  |
| O | -0.7475310 | 0.1231490  | 0.0000030  |
| H | -1.1347790 | -0.7624570 | 0.0000120  |

69
